# Supplementary material
Source: PubMed Central journal article supplement (PMC4955733)
Supplement: NIHMS789385-supplement-ESI_-_2.pdf [file NIHMS789385-supplement-ESI_-_2.pdf]

| UniProt | Gene   | Protein Name                                                  | Average spectral counts-negative sample | Average spectral counts-positive sample | Fold enrichment |
|---------|--------|---------------------------------------------------------------|-----------------------------------------|-----------------------------------------|-----------------|
| P12821  | ACE    | HUMAN - ACE Angiotensin-converting enzyme                     | 0                                       | 79.75                                   | #DIV/0!         |
| Q71U36  | TBA1A  | HUMAN - TUBA1A Tubulin alpha-1A chain                         | 0                                       | 59.5                                    | #DIV/0!         |
| P17812  | PYRG1  | HUMAN - CTPS1 CTP synthase 1                                  | 0                                       | 43.5                                    | #DIV/0!         |
| P23921  | RIR1   | HUMAN - RRM1 Ribonucleoside-diphosphate reductase large st    | 0                                       | 35                                      | #DIV/0!         |
| P49915  | GUAA   | HUMAN - GMPS GMP synthase                                     | 0                                       | 30.5                                    | #DIV/0!         |
| P30153  | 2AAA   | HUMAN - PPP2R1A Serine/threonine-protein phosphatase 2A 6     | 0                                       | 29                                      | #DIV/0!         |
| P55786  | PSA    | HUMAN - NPEPPS Puromycin-sensitive aminopeptidase             | 0                                       | 28.75                                   | #DIV/0!         |
| O43143  | DHX15  | HUMAN - DHX15 Putative pre-mRNA-splicing factor ATP-depen     | 0                                       | 28.25                                   | #DIV/0!         |
| P15170  | ERF3A  | HUMAN - GSPT1 Eukaryotic peptide chain release factor GTP-b   | 0                                       | 24.75                                   | #DIV/0!         |
| P09874  | PARP1  | HUMAN - PARP1 Poly                                            | 0                                       | 23.5                                    | #DIV/0!         |
| Q9BXJ9  | NAA15  | HUMAN - NAA15 N-alpha-acetyltransferase 15, NatA auxiliary si | 0                                       | 23                                      | #DIV/0!         |
| B0V043  | B0V043 | HUMAN - VARS Valyl-tRNA synthetase                            | 0                                       | 20                                      | #DIV/0!         |
| Q86VP6  | CAND1  | HUMAN - CAND1 Cullin-associated NEDD8-dissociated protein     | 0                                       | 19.5                                    | #DIV/0!         |
| P04080  | CYTB   | HUMAN - CSTB Cystatin-B                                       | 0                                       | 19                                      | #DIV/0!         |
| Q93009  | UBP7   | HUMAN - USP7 Ubiquitin carboxyl-terminal hydrolase 7          | 0                                       | 18                                      | #DIV/0!         |
| Q9Y2L1  | RRP44  | HUMAN - DIS3 Exosome complex exonuclease RRP44                | 0                                       | 18                                      | #DIV/0!         |
| Q13748  | TBA3C  | HUMAN - TUBA3D Tubulin alpha-3C/D chain                       | 0                                       | 18                                      | #DIV/0!         |
| P29144  | TPP2   | HUMAN - TPP2 Tripeptidyl-peptidase 2                          | 0                                       | 17.5                                    | #DIV/0!         |
| Q16576  | RBBP7  | HUMAN - RBBP7 Histone-binding protein RBBP7                   | 0                                       | 16.75                                   | #DIV/0!         |
| O95757  | HS74L  | HUMAN - HSPA4L Heat shock 70 kDa protein 4L                   | 0                                       | 16.75                                   | #DIV/0!         |
| P27816  | MAP4   | HUMAN - MAP4 Microtubule-associated protein 4                 | 0                                       | 16.25                                   | #DIV/0!         |
| Q92598  | HS105  | HUMAN - HSPH1 Heat shock protein 105 kDa                      | 0                                       | 15.75                                   | #DIV/0!         |
| O75663  | TIPRL  | HUMAN - TIPRL TIP41-like protein                              | 0                                       | 14.75                                   | #DIV/0!         |
| Q7Z6Z7  | HUWE1  | HUMAN - HUWE1 E3 ubiquitin-protein ligase HUWE1               | 0                                       | 14.75                                   | #DIV/0!         |

|        |       |                                                                |   |       |         |
|--------|-------|----------------------------------------------------------------|---|-------|---------|
| P63151 | 2ABA  | HUMAN - PPP2R2A Serine/threonine-protein phosphatase 2A 5      | 0 | 14.5  | #DIV/0! |
| Q9BTE3 | MCMBP | HUMAN - MCMBP Mini-chromosome maintenance complex-binc         | 0 | 14.25 | #DIV/0! |
| A0AVT1 | UBA6  | HUMAN - UBA6 Ubiquitin-like modifier-activating enzyme 6       | 0 | 14.25 | #DIV/0! |
| P45974 | UBP5  | HUMAN - USP5 Ubiquitin carboxyl-terminal hydrolase 5           | 0 | 14.25 | #DIV/0! |
| O75643 | U520  | HUMAN - SNRNP200 U5 small nuclear ribonucleoprotein 200 kL     | 0 | 14.25 | #DIV/0! |
| P21266 | GSTM3 | HUMAN - GSTM3 Glutathione S-transferase Mu 3                   | 0 | 14    | #DIV/0! |
| O00429 | DNM1L | HUMAN - DNM1L Dynamin-1-like protein                           | 0 | 14    | #DIV/0! |
| Q92945 | FUBP2 | HUMAN - KHSRP Far upstream element-binding protein 2           | 0 | 14    | #DIV/0! |
| Q13155 | AIMP2 | HUMAN - AIMP2 Aminoacyl tRNA synthase complex-interacting      | 0 | 14    | #DIV/0! |
| Q13310 | PABP4 | HUMAN - PABPC4 Polyadenylate-binding protein 4                 | 0 | 14    | #DIV/0! |
| Q15021 | CND1  | HUMAN - NCAPD2 Condensin complex subunit 1                     | 0 | 14    | #DIV/0! |
| P56192 | SYMC  | HUMAN - MARS Methionine--tRNA ligase, cytoplasmic              | 0 | 13.75 | #DIV/0! |
| Q9H3U1 | UN45A | HUMAN - UNC45A Protein unc-45 homolog A                        | 0 | 13.75 | #DIV/0! |
| P31948 | STIP1 | HUMAN - STIP1 Stress-induced-phosphoprotein 1                  | 0 | 13.5  | #DIV/0! |
| Q9ULV4 | COR1C | HUMAN - CORO1C Coronin-1C                                      | 0 | 12.75 | #DIV/0! |
| P52701 | MSH6  | HUMAN - MSH6 DNA mismatch repair protein Msh6                  | 0 | 12.5  | #DIV/0! |
| P41252 | SYIC  | HUMAN - IARS Isoleucine--tRNA ligase, cytoplasmic              | 0 | 12.5  | #DIV/0! |
| P11940 | PABP1 | HUMAN - PABPC1 Polyadenylate-binding protein 1                 | 0 | 12    | #DIV/0! |
| Q04637 | IF4G1 | HUMAN - EIF4G1 Eukaryotic translation initiation factor 4 gamm | 0 | 12    | #DIV/0! |
| O60271 | JIP4  | HUMAN - SPAG9 C-Jun-amino-terminal kinase-interacting prote    | 0 | 11.5  | #DIV/0! |
| Q07666 | KHDR1 | HUMAN - KHDRBS1 KH domain-containing, RNA-binding, signa       | 0 | 11.5  | #DIV/0! |
| Q13200 | PSMD2 | HUMAN - PSMD2 26S proteasome non-ATPase regulatory subu        | 0 | 11.25 | #DIV/0! |
| P61221 | ABCE1 | HUMAN - ABCE1 ATP-binding cassette sub-family E member 1       | 0 | 11    | #DIV/0! |
| Q06210 | GFPT1 | HUMAN - GFPT1 Glucosamine--fructose-6-phosphate aminotrar      | 0 | 11    | #DIV/0! |
| Q7KZF4 | SND1  | HUMAN - SND1 Staphylococcal nuclease domain-containing prc     | 0 | 11    | #DIV/0! |
| Q9H4A4 | AMPB  | HUMAN - RNPEP Aminopeptidase B                                 | 0 | 10.75 | #DIV/0! |
| Q9NTJ3 | SMC4  | HUMAN - SMC4 Structural maintenance of chromosomes protei      | 0 | 10.75 | #DIV/0! |
| Q9UI26 | IPO11 | HUMAN - IPO11 Importin-11                                      | 0 | 10.5  | #DIV/0! |
| Q93008 | USP9X | HUMAN - USP9X Probable ubiquitin carboxyl-terminal hydrolase   | 0 | 10.5  | #DIV/0! |
| P46109 | CRKL  | HUMAN - CRKL Crk-like protein                                  | 0 | 10.25 | #DIV/0! |
| Q9BTW9 | TBCD  | HUMAN - TBCD Tubulin-specific chaperone D                      | 0 | 10.25 | #DIV/0! |

|        |        |                                                                  |   |       |         |
|--------|--------|------------------------------------------------------------------|---|-------|---------|
| Q99460 | PSMD1  | HUMAN - PSMD1 26S proteasome non-ATPase regulatory subu          | 0 | 10.25 | #DIV/0! |
| P78347 | GTF2I  | HUMAN - GTF2I General transcription factor II-I                  | 0 | 10.25 | #DIV/0! |
| Q6PKG0 | LARP1  | HUMAN - LARP1 La-related protein 1                               | 0 | 10.25 | #DIV/0! |
| Q14166 | TTL12  | HUMAN - TTL12 Tubulin--tyrosine ligase-like protein 12           | 0 | 10    | #DIV/0! |
| Q9HB71 | CYBP   | HUMAN - CACYBP Calcyclin-binding protein                         | 0 | 9.75  | #DIV/0! |
| P42858 | HD     | HUMAN - HTT Huntingtin                                           | 0 | 9.75  | #DIV/0! |
| Q13838 | DX39B  | HUMAN - DDX39B Spliceosome RNA helicase DDX39B                   | 0 | 9.5   | #DIV/0! |
| Q96FW1 | OTUB1  | HUMAN - OTUB1 Ubiquitin thioesterase OTUB1                       | 0 | 9.5   | #DIV/0! |
| P43246 | MSH2   | HUMAN - MSH2 DNA mismatch repair protein Msh2                    | 0 | 9.5   | #DIV/0! |
| P53618 | COPB   | HUMAN - COPB1 Coatomer subunit beta                              | 0 | 9.5   | #DIV/0! |
| Q9UHD1 | CHRD1  | HUMAN - CHORDC1 Cysteine and histidine-rich domain-contain       | 0 | 9.25  | #DIV/0! |
| P34932 | HSP74  | HUMAN - HSPA4 Heat shock 70 kDa protein 4                        | 0 | 9.25  | #DIV/0! |
| P55884 | EIF3B  | HUMAN - EIF3B Eukaryotic translation initiation factor 3 subunit | 0 | 9.25  | #DIV/0! |
| Q96F07 | CYFP2  | HUMAN - CYFIP2 Cytoplasmic FMR1-interacting protein 2            | 0 | 9.25  | #DIV/0! |
| O60343 | TBCD4  | HUMAN - TBC1D4 TBC1 domain family member 4                       | 0 | 9.25  | #DIV/0! |
| Q96P70 | IPO9   | HUMAN - IPO9 Importin-9                                          | 0 | 9.25  | #DIV/0! |
| P54136 | SYRC   | HUMAN - RARS Arginine--tRNA ligase, cytoplasmic                  | 0 | 9     | #DIV/0! |
| Q86X55 | CARM1  | HUMAN - CARM1 Histone-arginine methyltransferase CARM1           | 0 | 9     | #DIV/0! |
| Q7L576 | CYFP1  | HUMAN - CYFIP1 Cytoplasmic FMR1-interacting protein 1            | 0 | 9     | #DIV/0! |
| P51610 | HCFC1  | HUMAN - HCFC1 Host cell factor 1                                 | 0 | 9     | #DIV/0! |
| Q9NRF8 | PYRG2  | HUMAN - CTPS2 CTP synthase 2                                     | 0 | 9     | #DIV/0! |
| Q9UM54 | MYO6   | HUMAN - MYO6 Unconventional myosin-VI                            | 0 | 9     | #DIV/0! |
| P61088 | UBE2N  | HUMAN - UBE2N Ubiquitin-conjugating enzyme E2 N                  | 0 | 8.75  | #DIV/0! |
| Q15813 | TBCE   | HUMAN - TBCE Tubulin-specific chaperone E                        | 0 | 8.75  | #DIV/0! |
| P31689 | DNJA1  | HUMAN - DNAJA1 DnaJ homolog subfamily A member 1                 | 0 | 8.75  | #DIV/0! |
| Q15645 | PCH2   | HUMAN - TRIP13 Pachytene checkpoint protein 2 homolog            | 0 | 8.5   | #DIV/0! |
| Q07866 | KLC1   | HUMAN - KLC1 Kinesin light chain 1                               | 0 | 8.5   | #DIV/0! |
| E7EVH7 | E7EVH7 | HUMA - KLC1 Kinesin light chain 1                                | 0 | 8.5   | #DIV/0! |
| Q8N3C0 | ASCC3  | HUMAN - ASCC3 Activating signal cointegrator 1 complex subur     | 0 | 8.5   | #DIV/0! |
| P39019 | RS19   | HUMAN - RPS19 40S ribosomal protein S19                          | 0 | 8.25  | #DIV/0! |
| P25786 | PSA1   | HUMAN - PSMA1 Proteasome subunit alpha type-1                    | 0 | 8.25  | #DIV/0! |

|        |       |                                                             |   |      |         |
|--------|-------|-------------------------------------------------------------|---|------|---------|
| O60506 | HNRPQ | HUMAN - SYNCRIP Heterogeneous nuclear ribonucleoprotein C   | 0 | 8.25 | #DIV/0! |
| P49588 | SYAC  | HUMAN - AARS Alanine--tRNA ligase, cytoplasmic              | 0 | 8.25 | #DIV/0! |
| P51812 | KS6A3 | HUMAN - RPS6KA3 Ribosomal protein S6 kinase alpha-3         | 0 | 8.25 | #DIV/0! |
| Q6IBS0 | TWF2  | HUMAN - TWF2 Twinfilin-2                                    | 0 | 8    | #DIV/0! |
| Q06124 | PTN11 | HUMAN - PTPN11 Tyrosine-protein phosphatase non-receptor t  | 0 | 8    | #DIV/0! |
| Q9NTK5 | OLA1  | HUMAN - OLA1 Obg-like ATPase 1                              | 0 | 8    | #DIV/0! |
| Q9HAV4 | XPO5  | HUMAN - XPO5 Exportin-5                                     | 0 | 8    | #DIV/0! |
| Q9NQ88 | TIGAR | HUMAN - TIGAR Fructose-2,6-bisphosphatase TIGAR             | 0 | 7.75 | #DIV/0! |
| P52888 | THOP1 | HUMAN - THOP1 Thimet oligopeptidase                         | 0 | 7.75 | #DIV/0! |
| Q15366 | PCBP2 | HUMAN - PCBP2 Poly(rC)-binding protein 2                    | 0 | 7.75 | #DIV/0! |
| P38606 | VATA  | HUMAN - ATP6V1A V-type proton ATPase catalytic subunit A    | 0 | 7.75 | #DIV/0! |
| Q15042 | RB3GP | HUMAN - RAB3GAP1 Rab3 GTPase-activating protein catalytic   | 0 | 7.75 | #DIV/0! |
| Q7Z4Q2 | HEAT3 | HUMAN - HEATR3 HEAT repeat-containing protein 3             | 0 | 7.75 | #DIV/0! |
| Q00341 | VIGLN | HUMAN - HDLBP Vigilin                                       | 0 | 7.75 | #DIV/0! |
| Q14694 | UBP10 | HUMAN - USP10 Ubiquitin carboxyl-terminal hydrolase 10      | 0 | 7.75 | #DIV/0! |
| Q9Y2V2 | CHSP1 | HUMAN - CARHSP1 Calcium-regulated heat stable protein 1     | 0 | 7.5  | #DIV/0! |
| P60981 | DEST  | HUMAN - DSTN Destrin                                        | 0 | 7.5  | #DIV/0! |
| Q9NRN7 | ADPPT | HUMAN - AASDHPPT L-aminoadipate-semialdehyde dehydroge      | 0 | 7.5  | #DIV/0! |
| O00232 | PSD12 | HUMAN - PSMD12 26S proteasome non-ATPase regulatory sub     | 0 | 7.5  | #DIV/0! |
| Q9NSD9 | SYFB  | HUMAN - FARSB Phenylalanine--tRNA ligase beta subunit       | 0 | 7.5  | #DIV/0! |
| Q12874 | SF3A3 | HUMAN - SF3A3 Splicing factor 3A subunit 3                  | 0 | 7.5  | #DIV/0! |
| Q9UNN5 | FAF1  | HUMAN - FAF1 FAS-associated factor 1                        | 0 | 7.5  | #DIV/0! |
| P55196 | AFAD  | HUMAN - MLLT4 Afadin                                        | 0 | 7.5  | #DIV/0! |
| Q15365 | PCBP1 | HUMAN - PCBP1 Poly(rC)-binding protein 1                    | 0 | 7.25 | #DIV/0! |
| Q9C0B1 | FTO   | HUMAN - FTO Alpha-ketoglutarate-dependent dioxygenase FTC   | 0 | 7.25 | #DIV/0! |
| P30520 | PURA2 | HUMAN - ADSS Adenylosuccinate synthetase isozyme 2          | 0 | 7.25 | #DIV/0! |
| Q13263 | TIF1B | HUMAN - TRIM28 Transcription intermediary factor 1-beta     | 0 | 7.25 | #DIV/0! |
| P57737 | CORO7 | HUMAN - CORO7 Coronin-7                                     | 0 | 7.25 | #DIV/0! |
| Q15233 | NONO  | HUMAN - NONO Non-POU domain-containing octamer-binding p    | 0 | 7.25 | #DIV/0! |
| Q8WUM4 | PDC6I | HUMAN - PDCD6IP Programmed cell death 6-interacting proteir | 0 | 7    | #DIV/0! |
| Q9Y5L0 | TNPO3 | HUMAN - TNPO3 Transportin-3                                 | 0 | 7    | #DIV/0! |

|        |       |                                                                  |   |      |         |
|--------|-------|------------------------------------------------------------------|---|------|---------|
| Q9Y678 | COPG1 | HUMAN - COPG1 Coatomer subunit gamma-1                           | 0 | 7    | #DIV/0! |
| Q00839 | HNRPU | HUMAN - HNRNPU Heterogeneous nuclear ribonucleoprotein U         | 0 | 7    | #DIV/0! |
| Q92900 | RENT1 | HUMAN - UPF1 Regulator of nonsense transcripts 1                 | 0 | 7    | #DIV/0! |
| Q13162 | PRDX4 | HUMAN - PRDX4 Peroxiredoxin-4                                    | 0 | 6.75 | #DIV/0! |
| O60256 | KPRB  | HUMAN - PRPSAP2 Phosphoribosyl pyrophosphate synthase-a:         | 0 | 6.75 | #DIV/0! |
| Q66LE6 | 2ABD  | HUMAN - PPP2R2D Serine/threonine-protein phosphatase 2A 5        | 0 | 6.75 | #DIV/0! |
| P51114 | FXR1  | HUMAN - FXR1 Fragile X mental retardation syndrome-related p     | 0 | 6.75 | #DIV/0! |
| Q9Y262 | EIF3L | HUMAN - EIF3L Eukaryotic translation initiation factor 3 subunit | 0 | 6.75 | #DIV/0! |
| P42224 | STAT1 | HUMAN - STAT1 Signal transducer and activator of transcription   | 0 | 6.75 | #DIV/0! |
| O95163 | ELP1  | HUMAN - IKBKAP Elongator complex protein 1                       | 0 | 6.75 | #DIV/0! |
| Q9UPU5 | UBP24 | HUMAN - USP24 Ubiquitin carboxyl-terminal hydrolase 24           | 0 | 6.75 | #DIV/0! |
| Q9H9A6 | LRC40 | HUMAN - LRRC40 Leucine-rich repeat-containing protein 40         | 0 | 6.5  | #DIV/0! |
| O75131 | CPNE3 | HUMAN - CPNE3 Copine-3                                           | 0 | 6.5  | #DIV/0! |
| Q9H0C8 | ILKAP | HUMAN - ILKAP Integrin-linked kinase-associated serine/threoni   | 0 | 6.5  | #DIV/0! |
| Q9H993 | CF211 | HUMAN - C6orf211 UPF0364 protein C6orf211                        | 0 | 6.5  | #DIV/0! |
| P52732 | KIF11 | HUMAN - KIF11 Kinesin-like protein KIF11                         | 0 | 6.5  | #DIV/0! |
| Q9Y490 | TLN1  | HUMAN - TLN1 Talin-1                                             | 0 | 6.5  | #DIV/0! |
| Q14566 | MCM6  | HUMAN - MCM6 DNA replication licensing factor MCM6               | 0 | 6.5  | #DIV/0! |
| Q9UL46 | PSME2 | HUMAN - PSME2 Proteasome activator complex subunit 2             | 0 | 6.25 | #DIV/0! |
| O15355 | PPM1G | HUMAN - PPM1G Protein phosphatase 1G                             | 0 | 6.25 | #DIV/0! |
| P47914 | RL29  | HUMAN - RPL29 60S ribosomal protein L29                          | 0 | 6.25 | #DIV/0! |
| O43847 | NRDC  | HUMAN - NRD1 Nardilysin                                          | 0 | 6.25 | #DIV/0! |
| P11216 | PYGB  | HUMAN - PYGB Glycogen phosphorylase, brain form                  | 0 | 6.25 | #DIV/0! |
| Q15717 | ELAV1 | HUMAN - ELAVL1 ELAV-like protein 1                               | 0 | 6    | #DIV/0! |
| P51003 | PAPOA | HUMAN - PAPOLA Poly(A) polymerase alpha                          | 0 | 6    | #DIV/0! |
| P31943 | HNRH1 | HUMAN - HNRNPH1 Heterogeneous nuclear ribonucleoprotein I        | 0 | 6    | #DIV/0! |
| P52292 | IMA2  | HUMAN - KPNA2 Importin subunit alpha-2                           | 0 | 6    | #DIV/0! |
| P30566 | PUR8  | HUMAN - ADSL Adenylosuccinate lyase                              | 0 | 6    | #DIV/0! |
| O95373 | IPO7  | HUMAN - IPO7 Importin-7                                          | 0 | 6    | #DIV/0! |
| Q9Y5Y2 | NUBP2 | HUMAN - NUBP2 Cytosolic Fe-S cluster assembly factor NUBP2       | 0 | 5.75 | #DIV/0! |
| P41227 | NAA10 | HUMAN - NAA10 N-alpha-acetyltransferase 10                       | 0 | 5.75 | #DIV/0! |

|        |        |                                                                                         |   |      |         |
|--------|--------|-----------------------------------------------------------------------------------------|---|------|---------|
| Q96PZ0 | PUS7   | HUMAN - PUS7 Pseudouridylate synthase 7 homolog                                         | 0 | 5.75 | #DIV/0! |
| P19174 | PLCG1  | HUMAN - PLCG1 1-phosphatidylinositol 4,5-bisphosphate phosphatase                       | 0 | 5.75 | #DIV/0! |
| O60502 | NCOAT  | HUMAN - MGEA5 Bifunctional protein NCOAT                                                | 0 | 5.75 | #DIV/0! |
| P46379 | BAG6   | HUMAN - BAG6 Large proline-rich protein BAG6                                            | 0 | 5.75 | #DIV/0! |
| P23443 | KS6B1  | HUMAN - RPS6KB1 Ribosomal protein S6 kinase beta-1                                      | 0 | 5.75 | #DIV/0! |
| P28482 | MK01   | HUMAN - MAPK1 Mitogen-activated protein kinase 1                                        | 0 | 5.75 | #DIV/0! |
| Q14CX7 | NAA25  | HUMAN - NAA25 N-alpha-acetyltransferase 25, NatB auxiliary subunit                      | 0 | 5.75 | #DIV/0! |
| Q5VYK3 | ECM29  | HUMAN - ECM29 Proteasome-associated protein ECM29 homolog                               | 0 | 5.75 | #DIV/0! |
| P61758 | PFD3   | HUMAN - VBP1 Prefoldin subunit 3                                                        | 0 | 5.5  | #DIV/0! |
| Q9BQA1 | MEP50  | HUMAN - WDR77 Methylosome protein 50                                                    | 0 | 5.5  | #DIV/0! |
| P47756 | CAPZB  | HUMAN - CAPZB F-actin-capping protein subunit beta                                      | 0 | 5.5  | #DIV/0! |
| P46063 | RECQ1  | HUMAN - RECQL ATP-dependent DNA helicase Q1                                             | 0 | 5.5  | #DIV/0! |
| P63208 | SKP1   | HUMAN - SKP1 S-phase kinase-associated protein 1                                        | 0 | 5.25 | #DIV/0! |
| Q9NQ75 | EXOS3  | HUMAN - EXOSC3 Exosome complex component RRP40                                          | 0 | 5.25 | #DIV/0! |
| Q13057 | COASY  | HUMAN - COASY Bifunctional coenzyme A synthase                                          | 0 | 5.25 | #DIV/0! |
| P15121 | ALDR   | HUMAN - AKR1B1 Aldose reductase                                                         | 0 | 5.25 | #DIV/0! |
| P56537 | IF6    | HUMAN - EIF6 Eukaryotic translation initiation factor 6                                 | 0 | 5.25 | #DIV/0! |
| Q9UI10 | EI2BD  | HUMAN - EIF2B4 Translation initiation factor eIF-2B subunit delta                       | 0 | 5.25 | #DIV/0! |
| P23381 | SYWC   | HUMAN - WARS Tryptophan--tRNA ligase, cytoplasmic                                       | 0 | 5.25 | #DIV/0! |
| Q16881 | TRXR1  | HUMAN - TXNRD1 Thioredoxin reductase 1, cytoplasmic                                     | 0 | 5.25 | #DIV/0! |
| Q15418 | KS6A1  | HUMAN - RPS6KA1 Ribosomal protein S6 kinase alpha-1                                     | 0 | 5.25 | #DIV/0! |
| Q9H6Z4 | RANB3  | HUMAN - RANBP3 Ran-binding protein 3                                                    | 0 | 5.25 | #DIV/0! |
| P54577 | SYYC   | HUMAN - YARS Tyrosine--tRNA ligase, cytoplasmic                                         | 0 | 5.25 | #DIV/0! |
| Q9H0D6 | XRN2   | HUMAN - XRN2 5'-3' exoribonuclease 2                                                    | 0 | 5.25 | #DIV/0! |
| O14929 | HAT1   | HUMAN - HAT1 Histone acetyltransferase type B catalytic subunit                         | 0 | 5.25 | #DIV/0! |
| P62714 | PP2AB  | HUMAN - PPP2CB Serine/threonine-protein phosphatase 2A catalytic subunit                | 0 | 5.25 | #DIV/0! |
| P67775 | PP2AA  | HUMAN - PPP2CA Serine/threonine-protein phosphatase 2A catalytic subunit                | 0 | 5.25 | #DIV/0! |
| O60313 | OPA1   | HUMAN - OPA1 Dynamin-like 120 kDa protein, mitochondrial                                | 0 | 5.25 | #DIV/0! |
| Q92538 | GBF1   | HUMAN - GBF1 Golgi-specific brefeldin A-resistance guanine nucleotide exchange factor 1 | 0 | 5.25 | #DIV/0! |
| H3BN98 | H3BN98 | HUMAN - Uncharacterized protein                                                         | 0 | 5.25 | #DIV/0! |
| P37802 | TAGL2  | HUMAN - TAGLN2 Transgelin-2                                                             | 0 | 5    | #DIV/0! |

|        |         |                                                               |   |      |         |
|--------|---------|---------------------------------------------------------------|---|------|---------|
| Q9Y3Z3 | SAMH1   | HUMAN - SAMHD1 SAM domain and HD domain-containing pro        | 0 | 5    | #DIV/0! |
| P51858 | HDGF    | HUMAN - HDGF Hepatoma-derived growth factor                   | 0 | 5    | #DIV/0! |
| Q99497 | PARK7   | HUMAN - PARK7 Protein DJ-1                                    | 0 | 5    | #DIV/0! |
| Q99615 | DNJC7   | HUMAN - DNAJC7 DnaJ homolog subfamily C member 7              | 0 | 5    | #DIV/0! |
| O95352 | ATG7    | HUMAN - ATG7 Ubiquitin-like modifier-activating enzyme ATG7   | 0 | 5    | #DIV/0! |
| Q02750 | MP2K1   | HUMAN - MAP2K1 Dual specificity mitogen-activated protein kin | 0 | 5    | #DIV/0! |
| P27361 | MK03    | HUMAN - MAPK3 Mitogen-activated protein kinase 3              | 0 | 5    | #DIV/0! |
| Q14C86 | GAPD1   | HUMAN - GAPVD1 GTPase-activating protein and VPS9 domair      | 0 | 5    | #DIV/0! |
| Q15020 | SART3   | HUMAN - SART3 Squamous cell carcinoma antigen recognized      | 0 | 5    | #DIV/0! |
| Q14203 | DCTN1   | HUMAN - DCTN1 Dynactin subunit 1                              | 0 | 5    | #DIV/0! |
| O60264 | SMCA5   | HUMAN - SMARCA5 SWI/SNF-related matrix-associated actin-c     | 0 | 5    | #DIV/0! |
| Q9HCN3 | TMM - T | HUMAN - Transmembrane protein 8A                              | 0 | 5    | #DIV/0! |
| P04843 | RPN1    | HUMAN - RPN1 Dolichyl-diphosphooligosaccharide--protein glyc  | 0 | 5    | #DIV/0! |
| P40616 | ARL1    | HUMAN - ARL1 ADP-ribosylation factor-like protein 1           | 0 | 4.75 | #DIV/0! |
| Q9Y3F4 | STRAP   | HUMAN - STRAP Serine-threonine kinase receptor-associated p   | 0 | 4.75 | #DIV/0! |
| Q92597 | NDRG1   | HUMAN - NDRG1 Protein NDRG1                                   | 0 | 4.75 | #DIV/0! |
| P61201 | CSN2    | HUMAN - COPS2 COP9 signalosome complex subunit 2              | 0 | 4.75 | #DIV/0! |
| Q08J23 | NSUN2   | HUMAN - NSUN2 tRNA (cytosine(34)-C(5))-methyltransferase      | 0 | 4.75 | #DIV/0! |
| Q06203 | PUR1    | HUMAN - PPAT Amidophosphoribosyltransferase                   | 0 | 4.75 | #DIV/0! |
| Q9H3P7 | GCP60   | HUMAN - ACBD3 Golgi resident protein GCP60                    | 0 | 4.75 | #DIV/0! |
| Q9NR45 | SIAS    | HUMAN - NANS Sialic acid synthase                             | 0 | 4.75 | #DIV/0! |
| Q8NEZ5 | FBX22   | HUMAN - FBXO22 F-box only protein 22                          | 0 | 4.75 | #DIV/0! |
| Q14444 | CAPR1   | HUMAN - CAPRIN1 Caprin-1                                      | 0 | 4.75 | #DIV/0! |
| Q9Y265 | RUVB1   | HUMAN - RUVBL1 RuvB-like 1                                    | 0 | 4.75 | #DIV/0! |
| P17844 | DDX5    | HUMAN - DDX5 Probable ATP-dependent RNA helicase DDX5         | 0 | 4.75 | #DIV/0! |
| Q9Y310 | RTCB    | HUMAN - C22orf28 tRNA-splicing ligase RtcB homolog            | 0 | 4.75 | #DIV/0! |
| Q9C0C9 | UBE2O   | HUMAN - UBE2O Ubiquitin-conjugating enzyme E2 O               | 0 | 4.75 | #DIV/0! |
| Q9UL63 | MKLN1   | HUMAN - MKLN1 Muskelin                                        | 0 | 4.75 | #DIV/0! |
| Q7Z3U7 | MON2    | HUMAN - MON2 Protein MON2 homolog                             | 0 | 4.75 | #DIV/0! |
| P54819 | KAD2    | HUMAN - AK2 Adenylate kinase 2, mitochondrial                 | 0 | 4.75 | #DIV/0! |
| Q9UBD5 | ORC3    | HUMAN - ORC3 Origin recognition complex subunit 3             | 0 | 4.75 | #DIV/0! |

|        |       |                                                                |   |      |         |
|--------|-------|----------------------------------------------------------------|---|------|---------|
| Q6P2Q9 | PRP8  | HUMAN - PRPF8 Pre-mRNA-processing-splicing factor 8            | 0 | 4.75 | #DIV/0! |
| Q9P287 | BCCIP | HUMAN - BCCIP BRCA2 and CDKN1A-interacting protein             | 0 | 4.5  | #DIV/0! |
| Q01581 | HMCS1 | HUMAN - HMGCS1 Hydroxymethylglutaryl-CoA synthase, cytopl      | 0 | 4.5  | #DIV/0! |
| Q9H9Q2 | CSN7B | HUMAN - COPS7B COP9 signalosome complex subunit 7b             | 0 | 4.5  | #DIV/0! |
| Q8NBF2 | NHLC2 | HUMAN - NHLRC2 NHL repeat-containing protein 2                 | 0 | 4.5  | #DIV/0! |
| Q9BUF5 | TBB6  | HUMAN - TUBB6 Tubulin beta-6 chain                             | 0 | 4.5  | #DIV/0! |
| P68402 | PA1B2 | HUMAN - PAFAH1B2 Platelet-activating factor acetylhydrolase II | 0 | 4.5  | #DIV/0! |
| Q99543 | DNJC2 | HUMAN - DNAJC2 DnaJ homolog subfamily C member 2               | 0 | 4.5  | #DIV/0! |
| Q01780 | EXOSX | HUMAN - EXOSC10 Exosome component 10                           | 0 | 4.5  | #DIV/0! |
| O75534 | CSDE1 | HUMAN - CSDE1 Cold shock domain-containing protein E1          | 0 | 4.5  | #DIV/0! |
| Q9NVE7 | PANK4 | HUMAN - PANK4 Pantothenate kinase 4                            | 0 | 4.5  | #DIV/0! |
| O43747 | AP1G1 | HUMAN - AP1G1 AP-1 complex subunit gamma-1                     | 0 | 4.5  | #DIV/0! |
| P43243 | MATR3 | HUMAN - MATR3 Matrin-3                                         | 0 | 4.5  | #DIV/0! |
| Q8TEQ6 | GEMI5 | HUMAN - GEMIN5 Gem-associated protein 5                        | 0 | 4.5  | #DIV/0! |
| P02768 | ALBU  | HUMAN - ALB Serum albumin                                      | 0 | 4.5  | #DIV/0! |
| P31946 | 1433B | HUMAN - YWHAB 14-3-3 protein beta/alpha                        | 0 | 4.25 | #DIV/0! |
| Q6IA86 | ELP2  | HUMAN - ELP2 Elongator complex protein 2                       | 0 | 4.25 | #DIV/0! |
| Q96SB4 | SRPK1 | HUMAN - SRPK1 SRSF protein kinase 1                            | 0 | 4.25 | #DIV/0! |
| Q15417 | CNN3  | HUMAN - CNN3 Calponin-3                                        | 0 | 4.25 | #DIV/0! |
| P50570 | DYN2  | HUMAN - DNM2 Dynamin-2                                         | 0 | 4.25 | #DIV/0! |
| P40763 | STAT3 | HUMAN - STAT3 Signal transducer and activator of transcription | 0 | 4.25 | #DIV/0! |
| Q96T76 | MMS19 | HUMAN - MMS19 MMS19 nucleotide excision repair protein hon     | 0 | 4.25 | #DIV/0! |
| Q15477 | SKIV2 | HUMAN - SKIV2L Helicase SKI2W                                  | 0 | 4.25 | #DIV/0! |
| O60841 | IF2P  | HUMAN - EIF5B Eukaryotic translation initiation factor 5B      | 0 | 4.25 | #DIV/0! |
| Q7L5N1 | CSN6  | HUMAN - COPS6 COP9 signalosome complex subunit 6               | 0 | 4.25 | #DIV/0! |
| Q13617 | CUL2  | HUMAN - CUL2 Cullin-2                                          | 0 | 4.25 | #DIV/0! |
| O00471 | EXOC5 | HUMAN - EXOC5 Exocyst complex component 5                      | 0 | 4.25 | #DIV/0! |
| Q9BSJ8 | ESYT1 | HUMAN - ESYT1 Extended synaptotagmin-1                         | 0 | 4.25 | #DIV/0! |
| Q15631 | TSN   | HUMAN - TSN Translin                                           | 0 | 4    | #DIV/0! |
| Q04760 | LGUL  | HUMAN - GLO1 Lactoylglutathione lyase                          | 0 | 4    | #DIV/0! |
| P07355 | ANXA2 | HUMAN - ANXA2 Annexin A2                                       | 0 | 4    | #DIV/0! |



|        |        |                                                                            |   |      |         |
|--------|--------|----------------------------------------------------------------------------|---|------|---------|
| Q99426 | TBCB   | HUMAN - TBCB Tubulin-folding cofactor B                                    | 0 | 4    | #DIV/0! |
| O75821 | EIF3G  | HUMAN - EIF3G Eukaryotic translation initiation factor 3 subunit           | 0 | 4    | #DIV/0! |
| Q13619 | CUL4A  | HUMAN - CUL4A Cullin-4A                                                    | 0 | 4    | #DIV/0! |
| P50990 | TCPQ   | HUMAN - CCT8 T-complex protein 1 subunit theta                             | 0 | 4    | #DIV/0! |
| P55265 | DSRAD  | HUMAN - ADAR Double-stranded RNA-specific adenosine deaminase              | 0 | 4    | #DIV/0! |
| Q9Y4X5 | ARI1   | HUMAN - ARIH1 E3 ubiquitin-protein ligase ARIH1                            | 0 | 4    | #DIV/0! |
| P55072 | TERA   | HUMAN - VCP Transitional endoplasmic reticulum ATPase                      | 0 | 4    | #DIV/0! |
| Q9H2G2 | SLK    | HUMAN - SLK STE20-like serine/threonine-protein kinase                     | 0 | 4    | #DIV/0! |
| Q9ULT8 | HECD1  | HUMAN - HECTD1 E3 ubiquitin-protein ligase HECTD1                          | 0 | 4    | #DIV/0! |
| B4DEV8 | B4DEV8 | HUMAN - PSMA1 Proteasome subunit alpha type                                | 0 | 4    | #DIV/0! |
| P30101 | PDIA3  | HUMAN - PDIA3 Protein disulfide-isomerase A3                               | 0 | 4    | #DIV/0! |
| Q9Y2T2 | AP3M1  | HUMAN - AP3M1 AP-3 complex subunit mu-1                                    | 0 | 4    | #DIV/0! |
| O00442 | RTCA   | HUMAN - RTCA RNA 3'-terminal phosphate cyclase                             | 0 | 4    | #DIV/0! |
| O75832 | PSD10  | HUMAN - PSMD10 26S proteasome non-ATPase regulatory subunit 10             | 0 | 4    | #DIV/0! |
| O95347 | SMC2   | HUMAN - SMC2 Structural maintenance of chromosomes protein 2               | 0 | 4    | #DIV/0! |
| P49736 | MCM2   | HUMAN - MCM2 DNA replication licensing factor MCM2                         | 0 | 4    | #DIV/0! |
| P54886 | P5CS   | HUMAN - ALDH18A1 Delta-1-pyrroline-5-carboxylate synthase                  | 0 | 4    | #DIV/0! |
| Q9BQG0 | MBB1A  | HUMAN - MYBBP1A Myb-binding protein 1A                                     | 0 | 4    | #DIV/0! |
| Q96DG6 | CMBL   | HUMAN - CMBL Carboxymethylenebutenolidase homolog                          | 0 | 3.75 | #DIV/0! |
| Q86UV5 | UBP48  | HUMAN - USP48 Ubiquitin carboxyl-terminal hydrolase 48                     | 0 | 3.75 | #DIV/0! |
| O95456 | PSMG1  | HUMAN - PSMG1 Proteasome assembly chaperone 1                              | 0 | 3.75 | #DIV/0! |
| Q01433 | AMPD2  | HUMAN - AMPD2 AMP deaminase 2                                              | 0 | 3.75 | #DIV/0! |
| Q14008 | CKAP5  | HUMAN - CKAP5 Cytoskeleton-associated protein 5                            | 0 | 3.75 | #DIV/0! |
| Q7Z4G4 | TRM11  | HUMAN - TRMT11 tRNA (guanine(10)-N2)-methyltransferase hC                  | 0 | 3.75 | #DIV/0! |
| Q5H9R7 | PPP6R3 | HUMAN - PPP6R3 Serine/threonine-protein phosphatase 6 regulatory subunit 3 | 0 | 3.75 | #DIV/0! |
| Q92599 | 8-Sep  | HUMAN - SEPT8 Septin-8                                                     | 0 | 3.75 | #DIV/0! |
| Q15067 | ACOX1  | HUMAN - ACOX1 Peroxisomal acyl-coenzyme A oxidase 1                        | 0 | 3.75 | #DIV/0! |
| O60306 | AQR    | HUMAN - AQR Intron-binding protein aquarius                                | 0 | 3.75 | #DIV/0! |
| Q9NXF1 | TEX10  | HUMAN - TEX10 Testis-expressed sequence 10 protein                         | 0 | 3.75 | #DIV/0! |
| Q9UGP8 | SEC63  | HUMAN - SEC63 Translocation protein SEC63 homolog                          | 0 | 3.75 | #DIV/0! |
| P53621 | COPA   | HUMAN - COPA Coatamer subunit alpha                                        | 0 | 3.75 | #DIV/0! |

|        |       |                                                               |   |      |         |
|--------|-------|---------------------------------------------------------------|---|------|---------|
| Q8NE71 | ABCF1 | HUMAN - ABCF1 ATP-binding cassette sub-family F member 1      | 0 | 3.75 | #DIV/0! |
| P62140 | PP1B  | HUMAN - PPP1CB Serine/threonine-protein phosphatase PP1-b     | 0 | 3.5  | #DIV/0! |
| O95336 | 6PGL  | HUMAN - PGLS 6-phosphogluconolactonase                        | 0 | 3.5  | #DIV/0! |
| P12955 | PEPD  | HUMAN - PEPD Xaa-Pro dipeptidase                              | 0 | 3.5  | #DIV/0! |
| Q9UNM6 | PSD13 | HUMAN - PSMD13 26S proteasome non-ATPase regulatory sub       | 0 | 3.5  | #DIV/0! |
| Q12792 | TWF1  | HUMAN - TWF1 Twinfilin-1                                      | 0 | 3.5  | #DIV/0! |
| Q92841 | DDX17 | HUMAN - DDX17 Probable ATP-dependent RNA helicase DDX1        | 0 | 3.5  | #DIV/0! |
| Q9H118 | ASCC2 | HUMAN - ASCC2 Activating signal cointegrator 1 complex subur  | 0 | 3.5  | #DIV/0! |
| P42166 | LAP2A | HUMAN - TMPO Lamina-associated polypeptide 2, isoform alph    | 0 | 3.5  | #DIV/0! |
| P49589 | SYCC  | HUMAN - CARS Cysteine--tRNA ligase, cytoplasmic               | 0 | 3.5  | #DIV/0! |
| O00203 | AP3B1 | HUMAN - AP3B1 AP-3 complex subunit beta-1                     | 0 | 3.5  | #DIV/0! |
| Q15334 | L2GL1 | HUMAN - LLGL1 Lethal(2) giant larvae protein homolog 1        | 0 | 3.5  | #DIV/0! |
| P46060 | RAGP1 | HUMAN - RANGAP1 Ran GTPase-activating protein 1               | 0 | 3.5  | #DIV/0! |
| Q14240 | IF4A2 | HUMAN - EIF4A2 Eukaryotic initiation factor 4A-II             | 0 | 3.5  | #DIV/0! |
| Q15459 | SF3A1 | HUMAN - SF3A1 Splicing factor 3A subunit 1                    | 0 | 3.5  | #DIV/0! |
| O94808 | GFPT2 | HUMAN - GFPT2 Glucosamine--fructose-6-phosphate aminotrar     | 0 | 3.5  | #DIV/0! |
| Q9H2M9 | RBGPR | HUMAN - RAB3GAP2 Rab3 GTPase-activating protein non-cata      | 0 | 3.5  | #DIV/0! |
| P17858 | K6PL  | HUMAN - PFKL 6-phosphofructokinase, liver type                | 0 | 3.5  | #DIV/0! |
| Q52LJ0 | FA98B | HUMAN - FAM98B Protein FAM98B                                 | 0 | 3.25 | #DIV/0! |
| Q13177 | PAK2  | HUMAN - PAK2 Serine/threonine-protein kinase PAK 2            | 0 | 3.25 | #DIV/0! |
| Q96H79 | ZCCHL | HUMAN - ZC3HAV1L Zinc finger CCCH-type antiviral protein 1-li | 0 | 3.25 | #DIV/0! |
| P50225 | ST1A1 | HUMAN - SULT1A1 Sulfotransferase 1A1                          | 0 | 3.25 | #DIV/0! |
| P50226 | ST1A2 | HUMAN - SULT1A2 Sulfotransferase 1A2                          | 0 | 3.25 | #DIV/0! |
| Q96115 | SCLY  | HUMAN - SCLY Selenocysteine lyase                             | 0 | 3.25 | #DIV/0! |
| Q12765 | SCRN1 | HUMAN - SCRN1 Secernin-1                                      | 0 | 3.25 | #DIV/0! |
| O14744 | ANM5  | HUMAN - PRMT5 Protein arginine N-methyltransferase 5          | 0 | 3.25 | #DIV/0! |
| Q92769 | HDAC2 | HUMAN - HDAC2 Histone deacetylase 2                           | 0 | 3.25 | #DIV/0! |
| Q8NFF5 | FAD1  | HUMAN - FLAD1 FAD synthase                                    | 0 | 3.25 | #DIV/0! |
| O43684 | BUB3  | HUMAN - BUB3 Mitotic checkpoint protein BUB3                  | 0 | 3.25 | #DIV/0! |
| Q6P3X3 | TTC27 | HUMAN - TTC27 Tetratricopeptide repeat protein 27             | 0 | 3.25 | #DIV/0! |
| Q92973 | TNPO1 | HUMAN - TNPO1 Transportin-1                                   | 0 | 3.25 | #DIV/0! |

|        |       |                                                                      |   |      |         |
|--------|-------|----------------------------------------------------------------------|---|------|---------|
| P33176 | KINH  | HUMAN - KIF5B Kinesin-1 heavy chain                                  | 0 | 3.25 | #DIV/0! |
| O75044 | SRGP2 | HUMAN - SRGAP2 SLIT-ROBO Rho GTPase-activating protein               | 0 | 3.25 | #DIV/0! |
| Q9H3S7 | PTN23 | HUMAN - PTPN23 Tyrosine-protein phosphatase non-receptor tyrosine    | 0 | 3.25 | #DIV/0! |
| Q9UMS4 | PRP19 | HUMAN - PRPF19 Pre-mRNA-processing factor 19                         | 0 | 3.25 | #DIV/0! |
| O00148 | DX39A | HUMAN - DDX39A ATP-dependent RNA helicase DDX39A                     | 0 | 3.25 | #DIV/0! |
| P33316 | DUT   | HUMAN - DUT Deoxyuridine 5'-triphosphate nucleotidohydrolase         | 0 | 3.25 | #DIV/0! |
| O95394 | AGM1  | HUMAN - PGM3 Phosphoacetylglucosamine mutase                         | 0 | 3.25 | #DIV/0! |
| P10155 | RO60  | HUMAN - TROVE2 60 kDa SS-A/Ro ribonucleoprotein                      | 0 | 3.25 | #DIV/0! |
| Q9BSJ2 | GCP2  | HUMAN - TUBGCP2 Gamma-tubulin complex component 2                    | 0 | 3.25 | #DIV/0! |
| Q9UHB9 | SRP68 | HUMAN - SRP68 Signal recognition particle 68 kDa protein             | 0 | 3.25 | #DIV/0! |
| P09960 | LKHA4 | HUMAN - LTA4H Leukotriene A-4 hydrolase                              | 0 | 3.25 | #DIV/0! |
| O75153 | CLU   | HUMAN - KIAA0664 Clustered mitochondria protein homolog              | 0 | 3.25 | #DIV/0! |
| Q13616 | CUL1  | HUMAN - CUL1 Cullin-1                                                | 0 | 3.25 | #DIV/0! |
| P42704 | LPPRC | HUMAN - LRPPRC Leucine-rich PPR motif-containing protein, nuclear    | 0 | 3.25 | #DIV/0! |
| Q9ULK4 | MED23 | HUMAN - MED23 Mediator of RNA polymerase II transcription subunit 23 | 0 | 3.25 | #DIV/0! |
| P13693 | TCTP  | HUMAN - TPT1 Translationally-controlled tumor protein                | 0 | 3    | #DIV/0! |
| Q8NC51 | PAIRB | HUMAN - SERBP1 Plasminogen activator inhibitor 1 RNA-binding protein | 0 | 3    | #DIV/0! |
| P35237 | SPB6  | HUMAN - SERPINB6 Serpin B6                                           | 0 | 3    | #DIV/0! |
| Q29RF7 | PDS5A | HUMAN - PDS5A Sister chromatid cohesion protein PDS5 homolog A       | 0 | 3    | #DIV/0! |
| P18858 | DNL1  | HUMAN - LIG1 DNA ligase 1                                            | 0 | 3    | #DIV/0! |
| O94888 | UBXN7 | HUMAN - UBXN7 UBX domain-containing protein 7                        | 0 | 3    | #DIV/0! |
| Q92747 | ARC1A | HUMAN - ARPC1A Actin-related protein 2/3 complex subunit 1A          | 0 | 3    | #DIV/0! |
| Q9UNE7 | CHIP  | HUMAN - STUB1 E3 ubiquitin-protein ligase CHIP                       | 0 | 3    | #DIV/0! |
| Q6P2E9 | EDC4  | HUMAN - EDC4 Enhancer of mRNA-decapping protein 4                    | 0 | 3    | #DIV/0! |
| Q15386 | UBE3C | HUMAN - UBE3C Ubiquitin-protein ligase E3C                           | 0 | 3    | #DIV/0! |
| Q8N1G4 | LRC47 | HUMAN - LRRC47 Leucine-rich repeat-containing protein 47             | 0 | 3    | #DIV/0! |
| Q9P253 | VPS18 | HUMAN - VPS18 Vacuolar protein sorting-associated protein 18         | 0 | 3    | #DIV/0! |
| Q96QU8 | XPO6  | HUMAN - XPO6 Exportin-6                                              | 0 | 3    | #DIV/0! |
| Q6P158 | DHX57 | HUMAN - DHX57 Putative ATP-dependent RNA helicase DHX57              | 0 | 3    | #DIV/0! |
| Q9Y6Y8 | S23IP | HUMAN - SEC23IP SEC23-interacting protein                            | 0 | 3    | #DIV/0! |
| Q12769 | NU160 | HUMAN - NUP160 Nuclear pore complex protein Nup160                   | 0 | 3    | #DIV/0! |

|        |       |                                                            |   |      |         |
|--------|-------|------------------------------------------------------------|---|------|---------|
| P07384 | CAN1  | HUMAN - CAPN1 Calpain-1 catalytic subunit                  | 0 | 3    | #DIV/0! |
| P17174 | AATC  | HUMAN - GOT1 Aspartate aminotransferase, cytoplasmic       | 0 | 2.75 | #DIV/0! |
| P41240 | CSK   | HUMAN - CSK Tyrosine-protein kinase CSK                    | 0 | 2.75 | #DIV/0! |
| Q9NR46 | SHLB2 | HUMAN - SH3GLB2 Endophilin-B2                              | 0 | 2.75 | #DIV/0! |
| O14910 | LIN7A | HUMAN - LIN7A Protein lin-7 homolog A                      | 0 | 2.75 | #DIV/0! |
| Q9NUP9 | LIN7C | HUMAN - LIN7C Protein lin-7 homolog C                      | 0 | 2.75 | #DIV/0! |
| P49005 | DPOD2 | HUMAN - POLD2 DNA polymerase delta subunit 2               | 0 | 2.75 | #DIV/0! |
| P55039 | DRG2  | HUMAN - DRG2 Developmentally-regulated GTP-binding proteir | 0 | 2.75 | #DIV/0! |
| Q8N163 | K1967 | HUMAN - KIAA1967 DBIRD complex subunit KIAA1967            | 0 | 2.75 | #DIV/0! |
| O43264 | ZW10  | HUMAN - ZW10 Centromere/kinetochore protein zw10 homolog   | 0 | 2.75 | #DIV/0! |
| Q9NSK0 | KLC4  | HUMAN - KLC4 Kinesin light chain 4                         | 0 | 2.75 | #DIV/0! |
| P42285 | SK2L2 | HUMAN - SKIV2L2 Superkiller viralicidic activity 2-like 2  | 0 | 2.75 | #DIV/0! |
| Q0IIM8 | TBC8B | HUMAN - TBC1D8B TBC1 domain family member 8B               | 0 | 2.75 | #DIV/0! |
| P42345 | MTOR  | HUMAN - MTOR Serine/threonine-protein kinase mTOR          | 0 | 2.75 | #DIV/0! |
| P62273 | RS29  | HUMAN - RPS29 40S ribosomal protein S29                    | 0 | 2.75 | #DIV/0! |
| P49903 | SPS1  | HUMAN - SEPHS1 Selenide, water dikinase 1                  | 0 | 2.75 | #DIV/0! |
| Q5VWZ2 | LYPL1 | HUMAN - LYPLAL1 Lysophospholipase-like protein 1           | 0 | 2.75 | #DIV/0! |
| P11172 | UMPS  | HUMAN - UMPS Uridine 5'-monophosphate synthase             | 0 | 2.75 | #DIV/0! |
| Q16555 | DPYL2 | HUMAN - DPYSL2 Dihydropyrimidinase-related protein 2       | 0 | 2.75 | #DIV/0! |
| Q3YEC7 | RABL6 | HUMAN - RABL6 Rab-like protein 6                           | 0 | 2.75 | #DIV/0! |
| Q9UUK9 | NUDT5 | HUMAN - NUDT5 ADP-sugar pyrophosphatase                    | 0 | 2.75 | #DIV/0! |
| Q9BQ70 | TCF25 | HUMAN - TCF25 Transcription factor 25                      | 0 | 2.75 | #DIV/0! |
| P35573 | GDE   | HUMAN - AGL Glycogen debranching enzyme                    | 0 | 2.75 | #DIV/0! |
| O00267 | SPT5H | HUMAN - SUPT5H Transcription elongation factor SPT5        | 0 | 2.75 | #DIV/0! |
| O95248 | MTMR5 | HUMAN - SBF1 Myotubularin-related protein 5                | 0 | 2.75 | #DIV/0! |
| Q5JTH9 | RRP12 | HUMAN - RRP12 RRP12-like protein                           | 0 | 2.75 | #DIV/0! |
| Q9BV86 | NTM1A | HUMAN - NTMT1 N-terminal Xaa-Pro-Lys N-methyltransferase 1 | 0 | 2.5  | #DIV/0! |
| O60678 | ANM3  | HUMAN - PRMT3 Protein arginine N-methyltransferase 3       | 0 | 2.5  | #DIV/0! |
| Q9H974 | QTRD1 | HUMAN - QTRTD1 Queuine tRNA-ribosyltransferase subunit QT  | 0 | 2.5  | #DIV/0! |
| Q8N6T3 | ARFG1 | HUMAN - ARFGAP1 ADP-ribosylation factor GTPase-activating  | 0 | 2.5  | #DIV/0! |
| P49902 | 5NTC  | HUMAN - NT5C2 Cytosolic purine 5'-nucleotidase             | 0 | 2.5  | #DIV/0! |

|        |       |                                                              |   |      |         |
|--------|-------|--------------------------------------------------------------|---|------|---------|
| Q8TEX9 | IPO4  | HUMAN - IPO4 Importin-4                                      | 0 | 2.5  | #DIV/0! |
| P28340 | DPOD1 | HUMAN - POLD1 DNA polymerase delta catalytic subunit         | 0 | 2.5  | #DIV/0! |
| Q00653 | NFKB2 | HUMAN - NFKB2 Nuclear factor NF-kappa-B p100 subunit         | 0 | 2.5  | #DIV/0! |
| Q14839 | CHD4  | HUMAN - CHD4 Chromodomain-helicase-DNA-binding protein 4     | 0 | 2.5  | #DIV/0! |
| Q9UKN8 | TF3C4 | HUMAN - GTF3C4 General transcription factor 3C polypeptide 4 | 0 | 2.5  | #DIV/0! |
| O95155 | UBE4B | HUMAN - UBE4B Ubiquitin conjugation factor E4 B              | 0 | 2.5  | #DIV/0! |
| P50851 | LRBA  | HUMAN - LRBA Lipopolysaccharide-responsive and beige-like a  | 0 | 2.5  | #DIV/0! |
| O75694 | NU155 | HUMAN - NUP155 Nuclear pore complex protein Nup155           | 0 | 2.5  | #DIV/0! |
| Q6YHU6 | THADA | HUMAN - THADA Thyroid adenoma-associated protein             | 0 | 2.5  | #DIV/0! |
| Q9Y2A7 | NCKP1 | HUMAN - NCKAP1 Nck-associated protein 1                      | 0 | 2.5  | #DIV/0! |
| Q92879 | CELF1 | HUMAN - CELF1 CUGBP Elav-like family member 1                | 0 | 2.5  | #DIV/0! |
| Q7L2J0 | MEPCE | HUMAN - MEPCE 7SK snRNA methylphosphate capping enzym        | 0 | 2.5  | #DIV/0! |
| Q9Y5P4 | C43BP | HUMAN - COL4A3BP Collagen type IV alpha-3-binding protein    | 0 | 2.5  | #DIV/0! |
| Q13148 | TADBP | HUMAN - TARDBP TAR DNA-binding protein 43                    | 0 | 2.5  | #DIV/0! |
| Q9UBF8 | PI4KB | HUMAN - PI4KB Phosphatidylinositol 4-kinase beta             | 0 | 2.5  | #DIV/0! |
| Q9NQX3 | GEPH  | HUMAN - GPHN Gephyrin                                        | 0 | 2.5  | #DIV/0! |
| Q08AM6 | VAC14 | HUMAN - VAC14 Protein VAC14 homolog                          | 0 | 2.5  | #DIV/0! |
| Q96RS6 | NUDC1 | HUMAN - NUDCD1 NudC domain-containing protein 1              | 0 | 2.5  | #DIV/0! |
| O15228 | GNPAT | HUMAN - GNPAT Dihydroxyacetone phosphate acyltransferase     | 0 | 2.5  | #DIV/0! |
| Q13618 | CUL3  | HUMAN - CUL3 Cullin-3                                        | 0 | 2.5  | #DIV/0! |
| Q14160 | SCRIB | HUMAN - SCRIB Protein scribble homolog                       | 0 | 2.5  | #DIV/0! |
| Q9BWH6 | RPAP1 | HUMAN - RPAP1 RNA polymerase II-associated protein 1         | 0 | 2.5  | #DIV/0! |
| Q5T4S7 | UBR4  | HUMAN - UBR4 E3 ubiquitin-protein ligase UBR4                | 0 | 2.5  | #DIV/0! |
| Q9P0L0 | VAPA  | HUMAN - VAPA Vesicle-associated membrane protein-associat    | 0 | 2.5  | #DIV/0! |
| Q86Y56 | HEAT2 | HUMAN - HEATR2 HEAT repeat-containing protein 2              | 0 | 2.5  | #DIV/0! |
| Q14997 | PSME4 | HUMAN - PSME4 Proteasome activator complex subunit 4         | 0 | 2.5  | #DIV/0! |
| Q9H4A6 | GOLP3 | HUMAN - GOLPH3 Golgi phosphoprotein 3                        | 0 | 2.25 | #DIV/0! |
| Q9Y2Z0 | SUGT1 | HUMAN - SUGT1 Suppressor of G2 allele of SKP1 homolog        | 0 | 2.25 | #DIV/0! |
| Q5JVF3 | PCID2 | HUMAN - PCID2 PCI domain-containing protein 2                | 0 | 2.25 | #DIV/0! |
| P14550 | AK1A1 | HUMAN - AKR1A1 Alcohol dehydrogenase                         | 0 | 2.25 | #DIV/0! |
| Q8TEA1 | NSUN6 | HUMAN - NSUN6 Putative methyltransferase NSUN6               | 0 | 2.25 | #DIV/0! |

|        |       |                                                                   |   |      |         |
|--------|-------|-------------------------------------------------------------------|---|------|---------|
| Q9Y6G9 | DC1L1 | HUMAN - DYNC1LI1 Cytoplasmic dynein 1 light intermediate chain    | 0 | 2.25 | #DIV/0! |
| Q9NW68 | BSDC1 | HUMAN - BSDC1 BSD domain-containing protein 1                     | 0 | 2.25 | #DIV/0! |
| O94830 | DDHD2 | HUMAN - DDHD2 Phospholipase DDHD2                                 | 0 | 2.25 | #DIV/0! |
| Q96SU4 | OSBL9 | HUMAN - OSBPL9 Oxysterol-binding protein-related protein 9        | 0 | 2.25 | #DIV/0! |
| Q9H4L7 | SMRCD | HUMAN - SMARCAD1 SWI/SNF-related matrix-associated actin          | 0 | 2.25 | #DIV/0! |
| Q92625 | ANS1A | HUMAN - ANKS1A Ankyrin repeat and SAM domain-containing protein 1 | 0 | 2.25 | #DIV/0! |
| P49773 | HINT1 | HUMAN - HINT1 Histidine triad nucleotide-binding protein 1        | 0 | 2.25 | #DIV/0! |
| Q15003 | CND2  | HUMAN - NCAPH Condensin complex subunit 2                         | 0 | 2.25 | #DIV/0! |
| P19784 | CSK22 | HUMAN - CSNK2A2 Casein kinase II subunit alpha'                   | 0 | 2.25 | #DIV/0! |
| P00390 | GSHR  | HUMAN - GSR Glutathione reductase, mitochondrial                  | 0 | 2.25 | #DIV/0! |
| O95671 | ASML  | HUMAN - ASMTL N-acetylserotonin O-methyltransferase-like protein  | 0 | 2.25 | #DIV/0! |
| Q8N3F8 | MILK1 | HUMAN - MICALL1 MICAL-like protein 1                              | 0 | 2.25 | #DIV/0! |
| Q92995 | UBP13 | HUMAN - USP13 Ubiquitin carboxyl-terminal hydrolase 13            | 0 | 2.25 | #DIV/0! |
| P15311 | EZRI  | HUMAN - EZR Ezrin                                                 | 0 | 2.25 | #DIV/0! |
| Q9H6S0 | YTDC2 | HUMAN - YTHDC2 Probable ATP-dependent RNA helicase YTHDC2         | 0 | 2.25 | #DIV/0! |
| Q9Y520 | PRC2C | HUMAN - PRRC2C Protein PRRC2C                                     | 0 | 2.25 | #DIV/0! |
| Q9H857 | NT5D2 | HUMAN - NT5DC2 5'-nucleotidase domain-containing protein 2        | 0 | 2.25 | #DIV/0! |
| Q8TDN6 | BRX1  | HUMAN - BRX1 Ribosome biogenesis protein BRX1 homolog             | 0 | 2.25 | #DIV/0! |
| Q13509 | TBB3  | HUMAN - TUBB3 Tubulin beta-3 chain                                | 0 | 2.25 | #DIV/0! |
| Q9BXP5 | SRRT  | HUMAN - SRRT Serrate RNA effector molecule homolog                | 0 | 2.25 | #DIV/0! |
| P35579 | MYH9  | HUMAN - MYH9 Myosin-9                                             | 0 | 2.25 | #DIV/0! |
| Q9NSI6 | BRWD1 | HUMAN - BRWD1 Bromodomain and WD repeat-containing protein 1      | 0 | 2.25 | #DIV/0! |
| O00487 | PSDE  | HUMAN - PSMD14 26S proteasome non-ATPase regulatory subunit 14    | 0 | 2    | #DIV/0! |
| Q9UBV8 | PEF1  | HUMAN - PEF1 Peflin                                               | 0 | 2    | #DIV/0! |
| Q9Y4P1 | ATG4B | HUMAN - ATG4B Cysteine protease ATG4B                             | 0 | 2    | #DIV/0! |
| Q5T6V5 | CI064 | HUMAN - C9orf64 UPF0553 protein C9orf64                           | 0 | 2    | #DIV/0! |
| O76003 | GLRX3 | HUMAN - GLRX3 Glutaredoxin-3                                      | 0 | 2    | #DIV/0! |
| Q96FV9 | THOC1 | HUMAN - THOC1 THO complex subunit 1                               | 0 | 2    | #DIV/0! |
| Q05048 | CSTF1 | HUMAN - CSTF1 Cleavage stimulation factor subunit 1               | 0 | 2    | #DIV/0! |
| Q5TBB1 | RNH2B | HUMAN - RNASEH2B Ribonuclease H2 subunit B                        | 0 | 2    | #DIV/0! |
| P53041 | PPP5  | HUMAN - PPP5C Serine/threonine-protein phosphatase 5              | 0 | 2    | #DIV/0! |

|        |       |                                                              |   |   |         |
|--------|-------|--------------------------------------------------------------|---|---|---------|
| Q86WB0 | NIPA  | HUMAN - ZC3HC1 Nuclear-interacting partner of ALK            | 0 | 2 | #DIV/0! |
| Q14974 | IMB1  | HUMAN - KPNB1 Importin subunit beta-1                        | 0 | 2 | #DIV/0! |
| O43252 | PAPS1 | HUMAN - PAPSS1 Bifunctional 3'-phosphoadenosine 5'-phosph    | 0 | 2 | #DIV/0! |
| P22681 | CBL   | HUMAN - CBL E3 ubiquitin-protein ligase CBL                  | 0 | 2 | #DIV/0! |
| O60610 | DIAP1 | HUMAN - DIAPH1 Protein diaphanous homolog 1                  | 0 | 2 | #DIV/0! |
| O94966 | UBP19 | HUMAN - USP19 Ubiquitin carboxyl-terminal hydrolase 19       | 0 | 2 | #DIV/0! |
| Q8NB90 | SPAT5 | HUMAN - SPATA5 Spermatogenesis-associated protein 5          | 0 | 2 | #DIV/0! |
| O75155 | CAND2 | HUMAN - CAND2 Cullin-associated NEDD8-dissociated protein    | 0 | 2 | #DIV/0! |
| Q66K74 | MAP1S | HUMAN - MAP1S Microtubule-associated protein 1S              | 0 | 2 | #DIV/0! |
| Q6YN16 | HSDL2 | HUMAN - HSDL2 Hydroxysteroid dehydrogenase-like protein 2    | 0 | 2 | #DIV/0! |
| Q9UJ70 | NAGK  | HUMAN - NAGK N-acetyl-D-glucosamine kinase                   | 0 | 2 | #DIV/0! |
| P52209 | 6PGD  | HUMAN - PGD 6-phosphogluconate dehydrogenase, decarboxyl     | 0 | 2 | #DIV/0! |
| Q9BWU0 | NADAP | HUMAN - SLC4A1AP Kanadaplin                                  | 0 | 2 | #DIV/0! |
| Q13330 | MTA1  | HUMAN - MTA1 Metastasis-associated protein MTA1              | 0 | 2 | #DIV/0! |
| Q9Y4C2 | F115A | HUMAN - FAM115A Protein FAM115A                              | 0 | 2 | #DIV/0! |
| Q9NZL4 | HPBP1 | HUMAN - HSPBP1 Hsp70-binding protein 1                       | 0 | 2 | #DIV/0! |
| Q2NL82 | TSR1  | HUMAN - TSR1 Pre-rRNA-processing protein TSR1 homolog        | 0 | 2 | #DIV/0! |
| Q9BXB4 | OSB11 | HUMAN - OSBPL11 Oxysterol-binding protein-related protein 11 | 0 | 2 | #DIV/0! |
| P49593 | PPM1F | HUMAN - PPM1F Protein phosphatase 1F                         | 0 | 2 | #DIV/0! |
| Q8WVJ2 | NUDC2 | HUMAN - NUDCD2 NudC domain-containing protein 2              | 0 | 2 | #DIV/0! |
| P0C0S5 | H2AZ  | HUMAN - H2AFZ Histone H2A.Z                                  | 0 | 2 | #DIV/0! |
| Q9BTM1 | H2AJ  | HUMAN - H2AFJ Histone H2A.J                                  | 0 | 2 | #DIV/0! |
| Q96QV6 | H2A1A | HUMAN - HIST1H2AA Histone H2A type 1-A                       | 0 | 2 | #DIV/0! |
| Q71UI9 | H2AV  | HUMAN - H2AFV Histone H2A.V                                  | 0 | 2 | #DIV/0! |
| Q16777 | H2A2C | HUMAN - HIST2H2AC Histone H2A type 2-C                       | 0 | 2 | #DIV/0! |
| P16104 | H2AX  | HUMAN - H2AFX Histone H2A.x                                  | 0 | 2 | #DIV/0! |
| P0C0S8 | H2A1  | HUMAN - HIST1H2AM Histone H2A type 1                         | 0 | 2 | #DIV/0! |
| Q9UHY1 | NRBP  | HUMAN - NRBP1 Nuclear receptor-binding protein               | 0 | 2 | #DIV/0! |
| P35520 | CBS   | HUMAN - CBS Cystathionine beta-synthase                      | 0 | 2 | #DIV/0! |
| Q9H7D7 | WDR26 | HUMAN - WDR26 WD repeat-containing protein 26                | 0 | 2 | #DIV/0! |
| Q14258 | TRI25 | HUMAN - TRIM25 E3 ubiquitin/ISG15 ligase TRIM25              | 0 | 2 | #DIV/0! |

|        |        |                                                                  |   |      |         |
|--------|--------|------------------------------------------------------------------|---|------|---------|
| Q92466 | DDB2   | HUMAN - DDB2 DNA damage-binding protein 2                        | 0 | 2    | #DIV/0! |
| Q13045 | FLII   | HUMAN - FLII Protein flightless-1 homolog                        | 0 | 2    | #DIV/0! |
| O43156 | TTI1   | HUMAN - TTI1 TELO2-interacting protein 1 homolog                 | 0 | 2    | #DIV/0! |
| Q14683 | SMC1A  | HUMAN - SMC1A Structural maintenance of chromosomes prot         | 0 | 2    | #DIV/0! |
| O43795 | MYO1B  | HUMAN - MYO1B Unconventional myosin-Ib                           | 0 | 2    | #DIV/0! |
| O14936 | CSKP   | HUMAN - CASK Peripheral plasma membrane protein CASK             | 0 | 2    | #DIV/0! |
| Q5VZK9 | LR16A  | HUMAN - LRRC16A Leucine-rich repeat-containing protein 16A       | 0 | 2    | #DIV/0! |
| Q12955 | ANK3   | HUMAN - ANK3 Ankyrin-3                                           | 0 | 2    | #DIV/0! |
| Q7Z2T5 | TRM1L  | HUMAN - TRMT1L TRMT1-like protein                                | 0 | 2    | #DIV/0! |
| Q01082 | SPTB2  | HUMAN - SPTBN1 Spectrin beta chain, non-erythrocytic 1           | 0 | 2    | #DIV/0! |
| P55795 | HNRH2  | HUMAN - HNRNPH2 Heterogeneous nuclear ribonucleoprotein I        | 0 | 2    | #DIV/0! |
| Q8N442 | GUF1   | HUMAN - GUF1 Translation factor GUF1, mitochondrial              | 0 | 2    | #DIV/0! |
| Q7Z4W1 | DCXR   | HUMAN - DCXR L-xylulose reductase                                | 0 | 1.75 | #DIV/0! |
| Q9UIC8 | LCMT1  | HUMAN - LCMT1 Leucine carboxyl methyltransferase 1               | 0 | 1.75 | #DIV/0! |
| Q16543 | CDC37  | HUMAN - CDC37 Hsp90 co-chaperone Cdc37                           | 0 | 1.75 | #DIV/0! |
| Q14232 | EI2BA  | HUMAN - EIF2B1 Translation initiation factor eIF-2B subunit alpl | 0 | 1.75 | #DIV/0! |
| O15371 | EIF3D  | HUMAN - EIF3D Eukaryotic translation initiation factor 3 subunit | 0 | 1.75 | #DIV/0! |
| Q9NZT2 | OGFR   | HUMAN - OGFR Opioid growth factor receptor                       | 0 | 1.75 | #DIV/0! |
| Q86XI2 | CNDG2  | HUMAN - NCAPG2 Condensin-2 complex subunit G2                    | 0 | 1.75 | #DIV/0! |
| Q7Z3T8 | ZFY16  | HUMAN - ZFYVE16 Zinc finger FYVE domain-containing protein       | 0 | 1.75 | #DIV/0! |
| Q7LBC6 | KDM3B  | HUMAN - KDM3B Lysine-specific demethylase 3B                     | 0 | 1.75 | #DIV/0! |
| Q96GX9 | MTNB   | HUMAN - APIP Probable methylthioribulose-1-phosphate dehydi      | 0 | 1.75 | #DIV/0! |
| Q99611 | SPS2   | HUMAN - SEPHS2 Selenide, water dikinase 2                        | 0 | 1.75 | #DIV/0! |
| Q96DI7 | SNR40  | HUMAN - SNRNP40 U5 small nuclear ribonucleoprotein 40 kDa        | 0 | 1.75 | #DIV/0! |
| O94903 | PROSC  | HUMAN - PROSC Proline synthase co-transcribed bacterial horr     | 0 | 1.75 | #DIV/0! |
| Q9UN36 | NDRG2  | HUMAN - NDRG2 Protein NDRG2                                      | 0 | 1.75 | #DIV/0! |
| Q16539 | MK14   | HUMAN - MAPK14 Mitogen-activated protein kinase 14               | 0 | 1.75 | #DIV/0! |
| A6NHG4 | DDTL   | HUMAN - DDTL D-dopachrome decarboxylase-like protein             | 0 | 1.75 | #DIV/0! |
| P30046 | DOPD   | HUMAN - DDT D-dopachrome decarboxylase                           | 0 | 1.75 | #DIV/0! |
| Q969Q0 | RL36L  | HUMAN - RPL36AL 60S ribosomal protein L36a-like                  | 0 | 1.75 | #DIV/0! |
| H7BZ11 | H7BZ11 | HUMA - Uncharacterized protein                                   | 0 | 1.75 | #DIV/0! |



|        |           |                                                              |   |      |         |
|--------|-----------|--------------------------------------------------------------|---|------|---------|
| O14579 | COPE      | HUMAN - COPE Coatomer subunit epsilon                        | 0 | 1.75 | #DIV/0! |
| O00541 | PESC      | HUMAN - PES1 Pescadillo homolog                              | 0 | 1.75 | #DIV/0! |
| I3L080 | I3L080    | HUMA - HDGFRP2 Hepatoma-derived growth factor-related prot   | 0 | 1.75 | #DIV/0! |
| P43686 | PRS6B     | HUMAN - PSMC4 26S protease regulatory subunit 6B             | 0 | 1.75 | #DIV/0! |
| Q8WU90 | ZC3HF     | HUMAN - ZC3H15 Zinc finger CCCH domain-containing protein    | 0 | 1.75 | #DIV/0! |
| Q9H270 | VPS11     | HUMAN - VPS11 Vacuolar protein sorting-associated protein 11 | 0 | 1.75 | #DIV/0! |
| Q96JM3 | CHAP1     | HUMAN - CHAMP1 Chromosome alignment-maintaining phosph       | 0 | 1.75 | #DIV/0! |
| Q86UE8 | TLK2      | HUMAN - TLK2 Serine/threonine-protein kinase tousled-like 2  | 0 | 1.75 | #DIV/0! |
| P14868 | SYDC      | HUMAN - DARS Aspartate--tRNA ligase, cytoplasmic             | 0 | 1.75 | #DIV/0! |
| Q9UNH7 | SNX6      | HUMAN - SNX6 Sorting nexin-6                                 | 0 | 1.75 | #DIV/0! |
| Q9Y266 | NUDC      | HUMAN - NUDC Nuclear migration protein nudC                  | 0 | 1.75 | #DIV/0! |
| P14735 | IDE       | HUMAN - IDE Insulin-degrading enzyme                         | 0 | 1.75 | #DIV/0! |
| Q9BWE0 | REPI1     | HUMAN - REPIN1 Replication initiator 1                       | 0 | 1.75 | #DIV/0! |
| O43491 | E41L2     | HUMAN - EPB41L2 Band 4.1-like protein 2                      | 0 | 1.75 | #DIV/0! |
| Q15436 | SC23A     | HUMAN - SEC23A Protein transport protein Sec23A              | 0 | 1.75 | #DIV/0! |
| Q86X10 | RLGPB     | HUMAN - RALGAPB Ral GTPase-activating protein subunit beta   | 0 | 1.75 | #DIV/0! |
| Q9NNW5 | WDR6      | HUMAN - WDR6 WD repeat-containing protein 6                  | 0 | 1.75 | #DIV/0! |
| Q5SRE5 | NU188     | HUMAN - NUP188 Nucleoporin NUP188 homolog                    | 0 | 1.75 | #DIV/0! |
| Q15059 | BRD3      | HUMAN - BRD3 Bromodomain-containing protein 3                | 0 | 1.75 | #DIV/0! |
| Q8WZ42 | TIT - TTI | HUMAN - Titin                                                | 0 | 1.75 | #DIV/0! |
| P36405 | ARL3      | HUMAN - ARL3 ADP-ribosylation factor-like protein 3          | 0 | 1.75 | #DIV/0! |
| Q08211 | DHX9      | HUMAN - DHX9 ATP-dependent RNA helicase A                    | 0 | 1.75 | #DIV/0! |
| Q9UQ16 | DYN3      | HUMAN - DNM3 Dynamin-3                                       | 0 | 1.75 | #DIV/0! |
| Q9NVI1 | FANCI     | HUMAN - FANCI Fanconi anemia group I protein                 | 0 | 1.75 | #DIV/0! |
| Q9BZE9 | ASPC1     | HUMAN - ASPSCR1 Tether containing UBX domain for GLUT4       | 0 | 1.5  | #DIV/0! |
| Q8N5D0 | WDTC1     | HUMAN - WDTC1 WD and tetratricopeptide repeats protein 1     | 0 | 1.5  | #DIV/0! |
| P26196 | DDX6      | HUMAN - DDX6 Probable ATP-dependent RNA helicase DDX6        | 0 | 1.5  | #DIV/0! |
| Q96G46 | DUS3L     | HUMAN - DUS3L tRNA-dihydrouridine(47) synthase               | 0 | 1.5  | #DIV/0! |
| Q96EB1 | ELP4      | HUMAN - ELP4 Elongator complex protein 4                     | 0 | 1.5  | #DIV/0! |
| Q99575 | POP1      | HUMAN - POP1 Ribonucleases P/MRP protein subunit POP1        | 0 | 1.5  | #DIV/0! |
| Q8NCA5 | FA98A     | HUMAN - FAM98A Protein FAM98A                                | 0 | 1.5  | #DIV/0! |

|        |       |                                                              |   |     |         |
|--------|-------|--------------------------------------------------------------|---|-----|---------|
| Q66K14 | TBC9B | HUMAN - TBC1D9B TBC1 domain family member 9B                 | 0 | 1.5 | #DIV/0! |
| Q05193 | DYN1  | HUMAN - DNM1 Dynamin-1                                       | 0 | 1.5 | #DIV/0! |
| Q7Z2Z2 | ETUD1 | HUMAN - EFTUD1 Elongation factor Tu GTP-binding domain-co    | 0 | 1.5 | #DIV/0! |
| P35080 | PROF2 | HUMAN - PFN2 Profilin-2                                      | 0 | 1.5 | #DIV/0! |
| Q14353 | GAMT  | HUMAN - GAMT Guanidinoacetate N-methyltransferase            | 0 | 1.5 | #DIV/0! |
| Q92530 | PSMF1 | HUMAN - PSMF1 Proteasome inhibitor PI31 subunit              | 0 | 1.5 | #DIV/0! |
| P61513 | RL37A | HUMAN - RPL37A 60S ribosomal protein L37a                    | 0 | 1.5 | #DIV/0! |
| P06493 | CDK1  | HUMAN - CDK1 Cyclin-dependent kinase 1                       | 0 | 1.5 | #DIV/0! |
| P53365 | ARFP2 | HUMAN - ARFIP2 Arfaptin-2                                    | 0 | 1.5 | #DIV/0! |
| P20839 | IMDH1 | HUMAN - IMPDH1 Inosine-5'-monophosphate dehydrogenase 1      | 0 | 1.5 | #DIV/0! |
| P40123 | CAP2  | HUMAN - CAP2 Adenylyl cyclase-associated protein 2           | 0 | 1.5 | #DIV/0! |
| Q96QC0 | PP1RA | HUMAN - PPP1R10 Serine/threonine-protein phosphatase 1 reg   | 0 | 1.5 | #DIV/0! |
| O94776 | MTA2  | HUMAN - MTA2 Metastasis-associated protein MTA2              | 0 | 1.5 | #DIV/0! |
| Q96IZ6 | MET2A | HUMAN - METTL2A Methyltransferase-like protein 2A            | 0 | 1.5 | #DIV/0! |
| Q6NYC1 | JMJD6 | HUMAN - JMJD6 Bifunctional arginine demethylase and lysyl-hy | 0 | 1.5 | #DIV/0! |
| Q15637 | SF01  | HUMAN - SF1 Splicing factor 1                                | 0 | 1.5 | #DIV/0! |
| Q9Y5X1 | SNX9  | HUMAN - SNX9 Sorting nexin-9                                 | 0 | 1.5 | #DIV/0! |
| P13807 | GYS1  | HUMAN - GYS1 Glycogen                                        | 0 | 1.5 | #DIV/0! |
| P46459 | NSF   | HUMAN - NSF Vesicle-fusing ATPase                            | 0 | 1.5 | #DIV/0! |
| P22087 | FBRL  | HUMAN - FBL rRNA 2'-O-methyltransferase fibrillar            | 0 | 1.5 | #DIV/0! |
| Q9Y4E8 | UBP15 | HUMAN - USP15 Ubiquitin carboxyl-terminal hydrolase 15       | 0 | 1.5 | #DIV/0! |
| Q13596 | SNX1  | HUMAN - SNX1 Sorting nexin-1                                 | 0 | 1.5 | #DIV/0! |
| Q8NHU6 | TDRD7 | HUMAN - TDRD7 Tudor domain-containing protein 7              | 0 | 1.5 | #DIV/0! |
| O60749 | SNX2  | HUMAN - SNX2 Sorting nexin-2                                 | 0 | 1.5 | #DIV/0! |
| Q92888 | ARHG1 | HUMAN - ARHGEF1 Rho guanine nucleotide exchange factor 1     | 0 | 1.5 | #DIV/0! |
| P48506 | GSH1  | HUMAN - GCLC Glutamate--cysteine ligase catalytic subunit    | 0 | 1.5 | #DIV/0! |
| Q16513 | PKN2  | HUMAN - PKN2 Serine/threonine-protein kinase N2              | 0 | 1.5 | #DIV/0! |
| Q9BQ52 | RNZZ  | HUMAN - ELAC2 Zinc phosphodiesterase ELAC protein 2          | 0 | 1.5 | #DIV/0! |
| Q96RU2 | UBP28 | HUMAN - USP28 Ubiquitin carboxyl-terminal hydrolase 28       | 0 | 1.5 | #DIV/0! |
| Q27J81 | INF2  | HUMAN - INF2 Inverted formin-2                               | 0 | 1.5 | #DIV/0! |
| P20585 | MSH3  | HUMAN - MSH3 DNA mismatch repair protein Msh3                | 0 | 1.5 | #DIV/0! |

|         |        |                                                               |   |     |         |
|---------|--------|---------------------------------------------------------------|---|-----|---------|
| O75717  | WDHD1  | HUMAN - WDHD1 WD repeat and HMG-box DNA-binding protei        | 0 | 1.5 | #DIV/0! |
| Q92922  | SMRC1  | HUMAN - SMARCC1 SWI/SNF complex subunit SMARCC1               | 0 | 1.5 | #DIV/0! |
| P22059  | OSBP1  | HUMAN - OSBP Oxysterol-binding protein 1                      | 0 | 1.5 | #DIV/0! |
| O15294  | OGT1   | HUMAN - OGT UDP-N-acetylglucosamine--peptide N-acetylgluc     | 0 | 1.5 | #DIV/0! |
| Q96EK7  | F120B  | HUMAN - FAM120B Constitutive coactivator of peroxisome prolii | 0 | 1.5 | #DIV/0! |
| Q96CW5  | GCP3   | HUMAN - TUBGCP3 Gamma-tubulin complex component 3             | 0 | 1.5 | #DIV/0! |
| Q14669  | TRIPC  | HUMAN - TRIP12 E3 ubiquitin-protein ligase TRIP12             | 0 | 1.5 | #DIV/0! |
| Q9BWJ5  | SF3B5  | HUMAN - SF3B5 Splicing factor 3B subunit 5                    | 0 | 1.5 | #DIV/0! |
| Q9P035  | HACD3  | HUMAN - PTPLAD1 3-hydroxyacyl-CoA dehydratase 3               | 0 | 1.5 | #DIV/0! |
| P27824  | CALX   | HUMAN - CANX Calnexin                                         | 0 | 1.5 | #DIV/0! |
| Q9UBT2  | SAE2   | HUMAN - UBA2 SUMO-activating enzyme subunit 2                 | 0 | 1.5 | #DIV/0! |
| P35249  | RFC4   | HUMAN - RFC4 Replication factor C subunit 4                   | 0 | 1.5 | #DIV/0! |
| P30048  | PRDX3  | HUMAN - PRDX3 Thioredoxin-dependent peroxide reductase, m     | 0 | 1.5 | #DIV/0! |
| O76021  | RL1D1  | HUMAN - RSL1D1 Ribosomal L1 domain-containing protein 1       | 0 | 1.5 | #DIV/0! |
| Q32P51  | RA1L2  | HUMAN - HNRNPA1L2 Heterogeneous nuclear ribonucleoprotei      | 0 | 1.5 | #DIV/0! |
| Q96A72  | MGN2   | HUMAN - MAGOHB Protein mago nashi homolog 2                   | 0 | 1.5 | #DIV/0! |
| Q99714  | HCD2   | HUMAN - HSD17B10 3-hydroxyacyl-CoA dehydrogenase type-2       | 0 | 1.5 | #DIV/0! |
| Q10713  | MPPA   | HUMAN - PMPCA Mitochondrial-processing peptidase subunit a    | 0 | 1.5 | #DIV/0! |
| P40939  | ECHA   | HUMAN - HADHA Trifunctional enzyme subunit alpha, mitochon    | 0 | 1.5 | #DIV/0! |
| O15269  | SPTC1  | HUMAN - SPTLC1 Serine palmitoyltransferase 1                  | 0 | 1.5 | #DIV/0! |
| Q7L2E3  | DHX30  | HUMAN - DHX30 Putative ATP-dependent RNA helicase DHX30       | 0 | 1.5 | #DIV/0! |
| Q9Y2X7  | GIT1   | HUMAN - GIT1 ARF GTPase-activating protein GIT1               | 0 | 1.5 | #DIV/0! |
| P49591  | SYSC   | HUMAN - SARS Serine--tRNA ligase, cytoplasmic                 | 0 | 1.5 | #DIV/0! |
| P26358  | DNMT1  | HUMAN - DNMT1 DNA (cytosine-5)-methyltransferase 1            | 0 | 1.5 | #DIV/0! |
| P25440  | BRD2   | HUMAN - BRD2 Bromodomain-containing protein 2                 | 0 | 1.5 | #DIV/0! |
| B0V073  | B0V073 | HUMA - BRD2 Bromodomain-containing protein 2                  | 0 | 1.5 | #DIV/0! |
| O95602  | RPA1   | HUMAN - POLR1A DNA-directed RNA polymerase I subunit RP,      | 0 | 1.5 | #DIV/0! |
| Q92621  | NU205  | HUMAN - NUP205 Nuclear pore complex protein Nup205            | 0 | 1.5 | #DIV/0! |
| P36873  | PP1G   | HUMAN - PPP1CC Serine/threonine-protein phosphatase PP1-c     | 0 | 1.5 | #DIV/0! |
| O15523  | DDX3Y  | HUMAN - DDX3Y ATP-dependent RNA helicase DDX3Y                | 0 | 1.5 | #DIV/0! |
| Q8I WV8 | UBR2   | HUMAN - UBR2 E3 ubiquitin-protein ligase UBR2                 | 0 | 1.5 | #DIV/0! |

|        |       |                                                                  |   |      |         |
|--------|-------|------------------------------------------------------------------|---|------|---------|
| P58546 | MTPN  | HUMAN - MTPN Myotrophin                                          | 0 | 1.25 | #DIV/0! |
| Q9BSD7 | NTPCR | HUMAN - NTPCR Cancer-related nucleoside-triphosphatase           | 0 | 1.25 | #DIV/0! |
| Q15019 | 2-Sep | HUMAN - SEPT2 Septin-2                                           | 0 | 1.25 | #DIV/0! |
| O00303 | EIF3F | HUMAN - EIF3F Eukaryotic translation initiation factor 3 subunit | 0 | 1.25 | #DIV/0! |
| Q06546 | GABPA | HUMAN - GABPA GA-binding protein alpha chain                     | 0 | 1.25 | #DIV/0! |
| Q99832 | TCPH  | HUMAN - CCT7 T-complex protein 1 subunit eta                     | 0 | 1.25 | #DIV/0! |
| Q13547 | HDAC1 | HUMAN - HDAC1 Histone deacetylase 1                              | 0 | 1.25 | #DIV/0! |
| Q9UJU6 | DBNL  | HUMAN - DBNL Drebrin-like protein                                | 0 | 1.25 | #DIV/0! |
| Q9ULA0 | DNPEP | HUMAN - DNPEP Aspartyl aminopeptidase                            | 0 | 1.25 | #DIV/0! |
| Q9BY77 | PDIP3 | HUMAN - POLDIP3 Polymerase delta-interacting protein 3           | 0 | 1.25 | #DIV/0! |
| P46976 | GLYG  | HUMAN - GYG1 Glycogenin-1                                        | 0 | 1.25 | #DIV/0! |
| Q9UHD8 | 9-Sep | HUMAN - SEPT9 Septin-9                                           | 0 | 1.25 | #DIV/0! |
| Q15437 | SC23B | HUMAN - SEC23B Protein transport protein Sec23B                  | 0 | 1.25 | #DIV/0! |
| Q9NZI8 | IF2B1 | HUMAN - IGF2BP1 Insulin-like growth factor 2 mRNA-binding pr     | 0 | 1.25 | #DIV/0! |
| Q9Y4R8 | TELO2 | HUMAN - TELO2 Telomere length regulation protein TEL2 homc       | 0 | 1.25 | #DIV/0! |
| Q6L8Q7 | PDE12 | HUMAN - PDE12 2',5'-phosphodiesterase 12                         | 0 | 1.25 | #DIV/0! |
| Q6NZY4 | ZCHC8 | HUMAN - ZCCHC8 Zinc finger CCHC domain-containing protein        | 0 | 1.25 | #DIV/0! |
| Q9BXW9 | FACD2 | HUMAN - FANCD2 Fanconi anemia group D2 protein                   | 0 | 1.25 | #DIV/0! |
| P55201 | BRPF1 | HUMAN - BRPF1 Peregrin                                           | 0 | 1.25 | #DIV/0! |
| P60903 | S10AA | HUMAN - S100A10 Protein S100-A10                                 | 0 | 1.25 | #DIV/0! |
| P10599 | THIO  | HUMAN - TXN Thioredoxin                                          | 0 | 1.25 | #DIV/0! |
| Q9Y224 | CN166 | HUMAN - C14orf166 UPF0568 protein C14orf166                      | 0 | 1.25 | #DIV/0! |
| Q9HBK9 | AS3MT | HUMAN - AS3MT Arsenite methyltransferase                         | 0 | 1.25 | #DIV/0! |
| P62280 | RS11  | HUMAN - RPS11 40S ribosomal protein S11                          | 0 | 1.25 | #DIV/0! |
| Q99439 | CNN2  | HUMAN - CNN2 Calponin-2                                          | 0 | 1.25 | #DIV/0! |
| Q9NQW7 | XPP1  | HUMAN - XPNPEP1 Xaa-Pro aminopeptidase 1                         | 0 | 1.25 | #DIV/0! |
| P23193 | TCEA1 | HUMAN - TCEA1 Transcription elongation factor A protein 1        | 0 | 1.25 | #DIV/0! |
| P60900 | PSA6  | HUMAN - PSMA6 Proteasome subunit alpha type-6                    | 0 | 1.25 | #DIV/0! |
| P04632 | CPNS1 | HUMAN - CAPNS1 Calpain small subunit 1                           | 0 | 1.25 | #DIV/0! |
| Q9BY32 | ITPA  | HUMAN - ITPA Inosine triphosphate pyrophosphatase                | 0 | 1.25 | #DIV/0! |
| P08243 | ASNS  | HUMAN - ASNS Asparagine synthetase                               | 0 | 1.25 | #DIV/0! |

|        |         |                                                             |   |      |         |
|--------|---------|-------------------------------------------------------------|---|------|---------|
| O60716 | CTND1   | HUMAN - CTNND1 Catenin delta-1                              | 0 | 1.25 | #DIV/0! |
| P30740 | ILEU    | HUMAN - SERPINB1 Leukocyte elastase inhibitor               | 0 | 1.25 | #DIV/0! |
| Q86TB9 | PATL1   | HUMAN - PATL1 Protein PAT1 homolog 1                        | 0 | 1.25 | #DIV/0! |
| Q00534 | CDK6    | HUMAN - CDK6 Cyclin-dependent kinase 6                      | 0 | 1.25 | #DIV/0! |
| Q9NWX4 | CD027   | HUMAN - C4orf27 UPF0609 protein C4orf27                     | 0 | 1.25 | #DIV/0! |
| P25788 | PSA3    | HUMAN - PSMA3 Proteasome subunit alpha type-3               | 0 | 1.25 | #DIV/0! |
| Q9BXW6 | OSBL1   | HUMAN - OSBPL1A Oxysterol-binding protein-related protein 1 | 0 | 1.25 | #DIV/0! |
| O60563 | CCNT1   | HUMAN - CCNT1 Cyclin-T1                                     | 0 | 1.25 | #DIV/0! |
| Q8IYS1 | P20D2   | HUMAN - PM20D2 Peptidase M20 domain-containing protein 2    | 0 | 1.25 | #DIV/0! |
| Q9HC35 | EMAL4   | HUMAN - EML4 Echinoderm microtubule-associated protein-like | 0 | 1.25 | #DIV/0! |
| Q9Y450 | HBS1L   | HUMAN - HBS1L HBS1-like protein                             | 0 | 1.25 | #DIV/0! |
| Q9BS26 | ERP44   | HUMAN - ERP44 Endoplasmic reticulum resident protein 44     | 0 | 1.25 | #DIV/0! |
| Q9C0D3 | ZY11B   | HUMAN - ZYG11B Protein zyg-11 homolog B                     | 0 | 1.25 | #DIV/0! |
| Q9Y6R4 | M3K4    | HUMAN - MAP3K4 Mitogen-activated protein kinase kinase kina | 0 | 1.25 | #DIV/0! |
| P36915 | GNL1    | HUMAN - GNL1 Guanine nucleotide-binding protein-like 1      | 0 | 1.25 | #DIV/0! |
| P51784 | UBP11   | HUMAN - USP11 Ubiquitin carboxyl-terminal hydrolase 11      | 0 | 1.25 | #DIV/0! |
| Q9UBN7 | HDAC6   | HUMAN - HDAC6 Histone deacetylase 6                         | 0 | 1.25 | #DIV/0! |
| Q86W56 | PARG    | HUMAN - PARG Poly(ADP-ribose) glycohydrolase                | 0 | 1.25 | #DIV/0! |
| Q9NZB2 | F120A   | HUMAN - FAM120A Constitutive coactivator of PPAR-gamma-lik  | 0 | 1.25 | #DIV/0! |
| Q02952 | AKA12   | HUMAN - AKAP12 A-kinase anchor protein 12                   | 0 | 1.25 | #DIV/0! |
| Q04206 | TF65    | HUMAN - RELA Transcription factor p65                       | 0 | 1.25 | #DIV/0! |
| Q9NTZ6 | RBM12   | HUMAN - RBM12 RNA-binding protein 12                        | 0 | 1.25 | #DIV/0! |
| Q16531 | DDB1    | HUMAN - DDB1 DNA damage-binding protein 1                   | 0 | 1.25 | #DIV/0! |
| Q9BPX3 | CND3    | HUMAN - NCAPG Condensin complex subunit 3                   | 0 | 1.25 | #DIV/0! |
| Q02388 | CO7 - C | HUMAN -Collagen alpha-1(VII) chain                          | 0 | 1.25 | #DIV/0! |
| P35658 | NU214   | HUMAN - NUP214 Nuclear pore complex protein Nup214          | 0 | 1.25 | #DIV/0! |
| O60885 | BRD4    | HUMAN - BRD4 Bromodomain-containing protein 4               | 0 | 1.25 | #DIV/0! |
| Q58F21 | BRDT    | HUMAN - BRDT Bromodomain testis-specific protein            | 0 | 1.25 | #DIV/0! |
| P62834 | RAP1A   | HUMAN - RAP1A Ras-related protein Rap-1A                    | 0 | 1.25 | #DIV/0! |
| P49721 | PSB2    | HUMAN - PSMB2 Proteasome subunit beta type-2                | 0 | 1.25 | #DIV/0! |
| P40938 | RFC3    | HUMAN - RFC3 Replication factor C subunit 3                 | 0 | 1.25 | #DIV/0! |

|        |          |                                                                  |   |      |         |
|--------|----------|------------------------------------------------------------------|---|------|---------|
| Q7L2H7 | EIF3M    | HUMAN - EIF3M Eukaryotic translation initiation factor 3 subunit | 0 | 1.25 | #DIV/0! |
| O75436 | VP26A    | HUMAN - VPS26A Vacuolar protein sorting-associated protein 2     | 0 | 1.25 | #DIV/0! |
| Q13451 | FKBP5    | HUMAN - FKBP5 Peptidyl-prolyl cis-trans isomerase FKBP5          | 0 | 1.25 | #DIV/0! |
| Q99798 | ACON     | HUMAN - ACO2 Aconitate hydratase, mitochondrial                  | 0 | 1.25 | #DIV/0! |
| P27797 | CALR     | HUMAN - CALR Calreticulin                                        | 0 | 1.25 | #DIV/0! |
| Q8IYI6 | EXOC8    | HUMAN - EXOC8 Exocyst complex component 8                        | 0 | 1.25 | #DIV/0! |
| Q5SY16 | NOL9     | HUMAN - NOL9 Polynucleotide 5'-hydroxyl-kinase NOL9              | 0 | 1.25 | #DIV/0! |
| P51116 | FXR2     | HUMAN - FXR2 Fragile X mental retardation syndrome-related p     | 0 | 1.25 | #DIV/0! |
| P35221 | CTNA1    | HUMAN - CTNNA1 Catenin alpha-1                                   | 0 | 1.25 | #DIV/0! |
| Q96SB8 | SMC6     | HUMAN - SMC6 Structural maintenance of chromosomes protei        | 0 | 1.25 | #DIV/0! |
| O94850 | DEN - DI | DEN - DDN Dendrin                                                | 0 | 1.25 | #DIV/0! |
| Q14139 | UBE4A    | HUMAN - UBE4A Ubiquitin conjugation factor E4 A                  | 0 | 1.25 | #DIV/0! |
| Q14684 | RRP1B    | HUMAN - RRP1B Ribosomal RNA processing protein 1 homolog         | 0 | 1.25 | #DIV/0! |
| Q96KG9 | NTKL     | HUMAN - SCYL1 N-terminal kinase-like protein                     | 0 | 1.25 | #DIV/0! |
| Q05519 | SRS11    | HUMAN - SRSF11 Serine/arginine-rich splicing factor 11           | 0 | 1.25 | #DIV/0! |
| P47712 | PA24A    | HUMAN - PLA2G4A Cytosolic phospholipase A2                       | 0 | 1.25 | #DIV/0! |
| P33993 | MCM7     | HUMAN - MCM7 DNA replication licensing factor MCM7               | 0 | 1.25 | #DIV/0! |
| P51532 | SMCA4    | HUMAN - SMARCA4 Transcription activator BRG1                     | 0 | 1.25 | #DIV/0! |
| Q14315 | FLNC     | HUMAN - FLNC Filamin-C                                           | 0 | 1.25 | #DIV/0! |
| P43487 | RANG     | HUMAN - RANBP1 Ran-specific GTPase-activating protein            | 0 | 1.25 | #DIV/0! |
| Q8N3U4 | STAG2    | HUMAN - STAG2 Cohesin subunit SA-2                               | 0 | 1.25 | #DIV/0! |
| Q86W42 | THOC6    | HUMAN - THOC6 THO complex subunit 6 homolog                      | 0 | 1    | #DIV/0! |
| O95983 | MBD3     | HUMAN - MBD3 Methyl-CpG-binding domain protein 3                 | 0 | 1    | #DIV/0! |
| P18077 | RL35A    | HUMAN - RPL35A 60S ribosomal protein L35a                        | 0 | 1    | #DIV/0! |
| P0CB43 | F203B    | HUMAN - FAM203B Protein FAM203B                                  | 0 | 1    | #DIV/0! |
| Q14195 | DPYL3    | HUMAN - DPYSL3 Dihydropyrimidinase-related protein 3             | 0 | 1    | #DIV/0! |
| P62873 | GBB1     | HUMAN - GNB1 Guanine nucleotide-binding protein G(I)/G(S)/G      | 0 | 1    | #DIV/0! |
| P62879 | GBB2     | HUMAN - GNB2 Guanine nucleotide-binding protein G(I)/G(S)/G      | 0 | 1    | #DIV/0! |
| P35250 | RFC2     | HUMAN - RFC2 Replication factor C subunit 2                      | 0 | 1    | #DIV/0! |
| Q8NHV4 | NEDD1    | HUMAN - NEDD1 Protein NEDD1                                      | 0 | 1    | #DIV/0! |
| Q6P1J9 | CDC73    | HUMAN - CDC73 Parafibromin                                       | 0 | 1    | #DIV/0! |

|        |          |                                                                 |   |   |         |
|--------|----------|-----------------------------------------------------------------|---|---|---------|
| O43865 | SAHH2    | HUMAN - AHCYL1 Putative adenosylhomocysteinase 2                | 0 | 1 | #DIV/0! |
| Q96HN2 | SAHH3    | HUMAN - AHCYL2 Putative adenosylhomocysteinase 3                | 0 | 1 | #DIV/0! |
| Q9NZW5 | MPP6     | HUMAN - MPP6 MAGUK p55 subfamily member 6                       | 0 | 1 | #DIV/0! |
| Q14432 | PDE - PI | HUMAN - cGMP-inhibited 3',5'-cyclic phosphodiesterase A         | 0 | 1 | #DIV/0! |
| Q8IZ83 | A16A1    | HUMAN - ALDH16A1 Aldehyde dehydrogenase family 16 memb          | 0 | 1 | #DIV/0! |
| Q8WZ42 | TITIN    | HUMAN - TTN Titin                                               | 0 | 1 | #DIV/0! |
| Q9C005 | DPY30    | HUMAN - DPY30 Protein dpy-30 homolog                            | 0 | 1 | #DIV/0! |
| Q2TAA2 | IAH1     | HUMAN - IAH1 Isoamyl acetate-hydrolyzing esterase 1 homolog     | 0 | 1 | #DIV/0! |
| Q9Y3E2 | BOLA1    | HUMAN - BOLA1 BolA-like protein 1                               | 0 | 1 | #DIV/0! |
| P42566 | EPS15    | HUMAN - EPS15 Epidermal growth factor receptor substrate 15     | 0 | 1 | #DIV/0! |
| Q969T7 | 5NT3L    | HUMAN - NT5C3L Cytosolic 5'-nucleotidase III-like protein       | 0 | 1 | #DIV/0! |
| Q9BVA0 | KTNB1    | HUMAN - KATNB1 Katanin p80 WD40-containing subunit B1           | 0 | 1 | #DIV/0! |
| P16930 | FAAA     | HUMAN - FAH Fumarylacetoacetase                                 | 0 | 1 | #DIV/0! |
| Q96SY0 | CO044    | HUMAN - C15orf44 UPF0464 protein C15orf44                       | 0 | 1 | #DIV/0! |
| E2QRD5 | E2QRD5   | HUMA - C15orf38-AP3S2 Protein C15orf38-AP3S2                    | 0 | 1 | #DIV/0! |
| P04818 | TYSY     | HUMAN - TYMS Thymidylate synthase                               | 0 | 1 | #DIV/0! |
| Q9BW91 | NUDT9    | HUMAN - NUDT9 ADP-ribose pyrophosphatase, mitochondrial         | 0 | 1 | #DIV/0! |
| P29083 | T2EA     | HUMAN - GTF2E1 General transcription factor IIE subunit 1       | 0 | 1 | #DIV/0! |
| Q92734 | TFG      | HUMAN - TFG Protein TFG                                         | 0 | 1 | #DIV/0! |
| O75569 | PRKRA    | HUMAN - PRKRA Interferon-inducible double stranded RNA-dep      | 0 | 1 | #DIV/0! |
| Q5TA45 | INT11    | HUMAN - CPSF3L Integrator complex subunit 11                    | 0 | 1 | #DIV/0! |
| O00560 | SDCB1    | HUMAN - SDCBP Syntenin-1                                        | 0 | 1 | #DIV/0! |
| Q9UJY5 | GGA1     | HUMAN - GGA1 ADP-ribosylation factor-binding protein GGA1       | 0 | 1 | #DIV/0! |
| O60934 | NBN      | HUMAN - NBN Nibrin                                              | 0 | 1 | #DIV/0! |
| Q9BQ67 | GRWD1    | HUMAN - GRWD1 Glutamate-rich WD repeat-containing protein       | 0 | 1 | #DIV/0! |
| O15144 | ARPC2    | HUMAN - ARPC2 Actin-related protein 2/3 complex subunit 2       | 0 | 1 | #DIV/0! |
| P04040 | CATA     | HUMAN - CAT Catalase                                            | 0 | 1 | #DIV/0! |
| P13861 | KAP2     | HUMAN - PRKAR2A cAMP-dependent protein kinase type II- $\alpha$ | 0 | 1 | #DIV/0! |
| Q96KB5 | TOPK     | HUMAN - PBK Lymphokine-activated killer T-cell-originated prot  | 0 | 1 | #DIV/0! |
| P12081 | SYHC     | HUMAN - HARS Histidine--tRNA ligase, cytoplasmic                | 0 | 1 | #DIV/0! |
| Q9UPN9 | TRI33    | HUMAN - TRIM33 E3 ubiquitin-protein ligase TRIM33               | 0 | 1 | #DIV/0! |

|        |       |                                                                |   |   |         |
|--------|-------|----------------------------------------------------------------|---|---|---------|
| Q8TC07 | TBC15 | HUMAN - TBC1D15 TBC1 domain family member 15                   | 0 | 1 | #DIV/0! |
| Q92688 | AN32B | HUMAN - ANP32B Acidic leucine-rich nuclear phosphoprotein 3:   | 0 | 1 | #DIV/0! |
| Q9BVS4 | RIOK2 | HUMAN - RIOK2 Serine/threonine-protein kinase RIO2             | 0 | 1 | #DIV/0! |
| Q9BV44 | THUM3 | HUMAN - THUMPD3 THUMP domain-containing protein 3              | 0 | 1 | #DIV/0! |
| O43592 | XPOT  | HUMAN - XPOT Exportin-T                                        | 0 | 1 | #DIV/0! |
| O60763 | USO1  | HUMAN - USO1 General vesicular transport factor p115           | 0 | 1 | #DIV/0! |
| Q9UHI6 | DDX20 | HUMAN - DDX20 Probable ATP-dependent RNA helicase DDX2         | 0 | 1 | #DIV/0! |
| Q99755 | PI51A | HUMAN - PIP5K1A Phosphatidylinositol 4-phosphate 5-kinase ty   | 0 | 1 | #DIV/0! |
| Q8IU88 | MINA  | HUMAN - MINA MYC-induced nuclear antigen                       | 0 | 1 | #DIV/0! |
| Q8WV99 | HNRL1 | HUMAN - HNRPLL Heterogeneous nuclear ribonucleoprotein L-l     | 0 | 1 | #DIV/0! |
| Q9UID3 | VPS51 | HUMAN - VPS51 Vacuolar protein sorting-associated protein 51   | 0 | 1 | #DIV/0! |
| Q9UJ41 | RABX5 | HUMAN - RABGEF1 Rab5 GDP/GTP exchange factor                   | 0 | 1 | #DIV/0! |
| P51692 | STA5B | HUMAN - STAT5B Signal transducer and activator of transcriptic | 0 | 1 | #DIV/0! |
| O15357 | SHIP2 | HUMAN - INPPL1 Phosphatidylinositol 3,4,5-trisphosphate 5-ph   | 0 | 1 | #DIV/0! |
| P42695 | CNDD3 | HUMAN - NCAPD3 Condensin-2 complex subunit D3                  | 0 | 1 | #DIV/0! |
| Q5T447 | HECD3 | HUMAN - HECTD3 E3 ubiquitin-protein ligase HECTD3              | 0 | 1 | #DIV/0! |
| O94822 | LTN1  | HUMAN - LTN1 E3 ubiquitin-protein ligase listerin              | 0 | 1 | #DIV/0! |
| P16157 | ANK1  | HUMAN - ANK1 Ankyrin-1                                         | 0 | 1 | #DIV/0! |
| Q86T10 | TBCD1 | HUMAN - TBC1D1 TBC1 domain family member 1                     | 0 | 1 | #DIV/0! |
| Q5JSZ5 | PRC2B | HUMAN - PRRC2B Protein PRRC2B                                  | 0 | 1 | #DIV/0! |
| Q01484 | ANK2  | HUMAN - ANK2 Ankyrin-2                                         | 0 | 1 | #DIV/0! |
| P60866 | RS20  | HUMAN - RPS20 40S ribosomal protein S20                        | 0 | 1 | #DIV/0! |
| Q07021 | C1QBP | HUMAN - C1QBP Complement component 1 Q subcomponent-t          | 0 | 1 | #DIV/0! |
| Q13185 | CBX3  | HUMAN - CBX3 Chromobox protein homolog 3                       | 0 | 1 | #DIV/0! |
| P53004 | BIEA  | HUMAN - BLVRA Biliverdin reductase A                           | 0 | 1 | #DIV/0! |
| O75083 | WDR1  | HUMAN - WDR1 WD repeat-containing protein 1                    | 0 | 1 | #DIV/0! |
| Q9UI12 | VATH  | HUMAN - ATP6V1H V-type proton ATPase subunit H                 | 0 | 1 | #DIV/0! |
| P51946 | CCNH  | HUMAN - CCNH Cyclin-H                                          | 0 | 1 | #DIV/0! |
| Q96BW5 | PTER  | HUMAN - PTER Phosphotriesterase-related protein                | 0 | 1 | #DIV/0! |
| Q92990 | GLMN  | HUMAN - GLMN Glomulin                                          | 0 | 1 | #DIV/0! |
| Q9P289 | MST4  | HUMAN - MST4 Serine/threonine-protein kinase MST4              | 0 | 1 | #DIV/0! |



|        |       |                                                                        |   |   |         |
|--------|-------|------------------------------------------------------------------------|---|---|---------|
| Q9ULE6 | PALD  | HUMAN - PALD1 Paladin                                                  | 0 | 1 | #DIV/0! |
| O00743 | PPP6  | HUMAN - PPP6C Serine/threonine-protein phosphatase 6 catalytic subunit | 0 | 1 | #DIV/0! |
| Q9UJX3 | APC7  | HUMAN - ANAPC7 Anaphase-promoting complex subunit 7                    | 0 | 1 | #DIV/0! |
| Q96QK1 | VPS35 | HUMAN - VPS35 Vacuolar protein sorting-associated protein 35           | 0 | 1 | #DIV/0! |
| Q13620 | CUL4B | HUMAN - CUL4B Cullin-4B                                                | 0 | 1 | #DIV/0! |
| Q9H9F9 | ARP5  | HUMAN - ACTR5 Actin-related protein 5                                  | 0 | 1 | #DIV/0! |
| Q15345 | LRC41 | HUMAN - LRRC41 Leucine-rich repeat-containing protein 41               | 0 | 1 | #DIV/0! |
| P35219 | CAH8  | HUMAN - CA8 Carbonic anhydrase-related protein                         | 0 | 1 | #DIV/0! |
| Q9BZH6 | WDR11 | HUMAN - WDR11 WD repeat-containing protein 11                          | 0 | 1 | #DIV/0! |
| Q96JG6 | CC132 | HUMAN - CCDC132 Coiled-coil domain-containing protein 132              | 0 | 1 | #DIV/0! |
| Q13131 | AAPK1 | HUMAN - PRKAA1 5'-AMP-activated protein kinase catalytic subunit 1     | 0 | 1 | #DIV/0! |
| Q15057 | ACAP2 | HUMAN - ACAP2 Arf-GAP with coiled-coil, ANK repeat and PH domain       | 0 | 1 | #DIV/0! |
| Q9NRG9 | AAAS  | HUMAN - AAAS Aladin                                                    | 0 | 1 | #DIV/0! |
| O95782 | AP2A1 | HUMAN - AP2A1 AP-2 complex subunit alpha-1                             | 0 | 1 | #DIV/0! |
| Q4G0J3 | LARP7 | HUMAN - LARP7 La-related protein 7                                     | 0 | 1 | #DIV/0! |
| Q13017 | RHG05 | HUMAN - ARHGAP5 Rho GTPase-activating protein 5                        | 0 | 1 | #DIV/0! |
| O60547 | GMDS  | HUMAN - GMDS GDP-mannose 4,6 dehydratase                               | 0 | 1 | #DIV/0! |
| Q8WWM7 | ATX2L | HUMAN - ATXN2L Ataxin-2-like protein                                   | 0 | 1 | #DIV/0! |
| Q9UIA9 | XPO7  | HUMAN - XPO7 Exportin-7                                                | 0 | 1 | #DIV/0! |
| O00291 | HIP1  | HUMAN - HIP1 Huntingtin-interacting protein 1                          | 0 | 1 | #DIV/0! |
| Q09161 | NCBP1 | HUMAN - NCBP1 Nuclear cap-binding protein subunit 1                    | 0 | 1 | #DIV/0! |
| P33992 | MCM5  | HUMAN - MCM5 DNA replication licensing factor MCM5                     | 0 | 1 | #DIV/0! |
| P26038 | MOES  | HUMAN - MSN Moesin                                                     | 0 | 1 | #DIV/0! |
| O14981 | BTA1  | HUMAN - BTAF1 TATA-binding protein-associated factor 172               | 0 | 1 | #DIV/0! |
| Q9UPY3 | DICER | HUMAN - DICER1 Endoribonuclease Dicer                                  | 0 | 1 | #DIV/0! |
| Q9P2K8 | E2AK4 | HUMAN - EIF2AK4 Eukaryotic translation initiation factor 2-alpha       | 0 | 1 | #DIV/0! |
| P28370 | SMCA1 | HUMAN - SMARCA1 Probable global transcription activator SMARCA1        | 0 | 1 | #DIV/0! |
| Q7Z478 | DHX29 | HUMAN - DHX29 ATP-dependent RNA helicase DHX29                         | 0 | 1 | #DIV/0! |
| A5YKK6 | CNOT1 | HUMAN - CNOT1 CCR4-NOT transcription complex subunit 1                 | 0 | 1 | #DIV/0! |
| O75116 | ROCK2 | HUMAN - ROCK2 Rho-associated protein kinase 2                          | 0 | 1 | #DIV/0! |
| P17655 | CAN2  | HUMAN - CAPN2 Calpain-2 catalytic subunit                              | 0 | 1 | #DIV/0! |

|        |         |                                                             |   |      |         |
|--------|---------|-------------------------------------------------------------|---|------|---------|
| Q5JRX3 | PREP    | HUMAN - PITRM1 Presequence protease, mitochondrial          | 0 | 1    | #DIV/0! |
| Q9Y277 | VDAC3   | HUMAN - VDAC3 Voltage-dependent anion-selective channel pr  | 0 | 1    | #DIV/0! |
| P04179 | SODM    | HUMAN - SOD2 Superoxide dismutase                           | 0 | 1    | #DIV/0! |
| Q04446 | GLGB    | HUMAN - GBE1 1,4-alpha-glucan-branching enzyme              | 0 | 1    | #DIV/0! |
| P42574 | CASP3   | HUMAN - CASP3 Caspase-3                                     | 0 | 0.75 | #DIV/0! |
| P28066 | PSA5    | HUMAN - PSMA5 Proteasome subunit alpha type-5               | 0 | 0.75 | #DIV/0! |
| Q8IVD9 | NUDC3   | HUMAN - NUDCD3 NudC domain-containing protein 3             | 0 | 0.75 | #DIV/0! |
| Q6DKJ4 | NXN     | HUMAN - NXN Nucleoredoxin                                   | 0 | 0.75 | #DIV/0! |
| P07203 | GPX1    | HUMAN - GPX1 Glutathione peroxidase 1                       | 0 | 0.75 | #DIV/0! |
| P53350 | PLK1    | HUMAN - PLK1 Serine/threonine-protein kinase PLK1           | 0 | 0.75 | #DIV/0! |
| Q9HAS0 | NJMU    | HUMAN - C17orf75 Protein Njmu-R1                            | 0 | 0.75 | #DIV/0! |
| Q9HAD4 | WDR41   | HUMAN - WDR41 WD repeat-containing protein 41               | 0 | 0.75 | #DIV/0! |
| Q9NRR5 | UBQL4   | HUMAN - UBQLN4 Ubiquilin-4                                  | 0 | 0.75 | #DIV/0! |
| Q9NWV8 | BABA1   | HUMAN - BABAM1 BRISC and BRCA1-A complex member 1           | 0 | 0.75 | #DIV/0! |
| P02533 | K1C14   | HUMAN - KRT14 Keratin, type I cytoskeletal 14               | 0 | 0.75 | #DIV/0! |
| Q6VY07 | PACS1   | HUMAN - PACS1 Phosphofurin acidic cluster sorting protein 1 | 0 | 0.75 | #DIV/0! |
| O94855 | SC24D   | HUMAN - SEC24D Protein transport protein Sec24D             | 0 | 0.75 | #DIV/0! |
| A6H8Y1 | BDP1    | HUMAN - BDP1 Transcription factor TFIIIB component B" homol | 0 | 0.75 | #DIV/0! |
| Q8N6M0 | OTU6B   | HUMAN - OTUD6B OTU domain-containing protein 6B             | 0 | 0.75 | #DIV/0! |
| Q9UKY7 | CDV - C | HUMAN -Protein CDV3 homolog                                 | 0 | 0.75 | #DIV/0! |
| P48507 | GSH0    | HUMAN - GCLM Glutamate--cysteine ligase regulatory subunit  | 0 | 0.75 | #DIV/0! |
| O00299 | CLIC1   | HUMAN - CLIC1 Chloride intracellular channel protein 1      | 0 | 0.75 | #DIV/0! |
| P61254 | RL26    | HUMAN - RPL26 60S ribosomal protein L26                     | 0 | 0.75 | #DIV/0! |
| P51452 | DUS3    | HUMAN - DUSP3 Dual specificity protein phosphatase 3        | 0 | 0.75 | #DIV/0! |
| Q12948 | FOXC1   | HUMAN - FOXC1 Forkhead box protein C1                       | 0 | 0.75 | #DIV/0! |
| P61289 | PSME3   | HUMAN - PSME3 Proteasome activator complex subunit 3        | 0 | 0.75 | #DIV/0! |
| Q9BQG2 | NUD12   | HUMAN - NUDT12 Peroxisomal NADH pyrophosphatase NUDT        | 0 | 0.75 | #DIV/0! |
| Q00796 | DHSO    | HUMAN - SORD Sorbitol dehydrogenase                         | 0 | 0.75 | #DIV/0! |
| Q9BRX2 | PELO    | HUMAN - PELO Protein pelota homolog                         | 0 | 0.75 | #DIV/0! |
| Q14137 | BOP1    | HUMAN - BOP1 Ribosome biogenesis protein BOP1               | 0 | 0.75 | #DIV/0! |
| Q9Y243 | AKT3    | HUMAN - AKT3 RAC-gamma serine/threonine-protein kinase      | 0 | 0.75 | #DIV/0! |

|        |       |                                                              |   |      |         |
|--------|-------|--------------------------------------------------------------|---|------|---------|
| Q9BY41 | HDAC8 | HUMAN - HDAC8 Histone deacetylase 8                          | 0 | 0.75 | #DIV/0! |
| Q9NZ52 | GGA3  | HUMAN - GGA3 ADP-ribosylation factor-binding protein GGA3    | 0 | 0.75 | #DIV/0! |
| P53367 | ARFP1 | HUMAN - ARFIP1 Arfaptin-1                                    | 0 | 0.75 | #DIV/0! |
| Q04323 | UBXN1 | HUMAN - UBXN1 UBX domain-containing protein 1                | 0 | 0.75 | #DIV/0! |
| Q96C19 | EFHD2 | HUMAN - EFHD2 EF-hand domain-containing protein D2           | 0 | 0.75 | #DIV/0! |
| Q70Z53 | F10C1 | HUMAN - FRA10AC1 Protein FRA10AC1                            | 0 | 0.75 | #DIV/0! |
| Q5T2E6 | CJ076 | HUMAN - C10orf76 UPF0668 protein C10orf76                    | 0 | 0.75 | #DIV/0! |
| Q8N6R0 | MET13 | HUMAN - METTL13 Methyltransferase-like protein 13            | 0 | 0.75 | #DIV/0! |
| Q9Y6E2 | BZW2  | HUMAN - BZW2 Basic leucine zipper and W2 domain-containing   | 0 | 0.75 | #DIV/0! |
| P32780 | TF2H1 | HUMAN - GTF2H1 General transcription factor IIH subunit 1    | 0 | 0.75 | #DIV/0! |
| P16383 | GCFC2 | HUMAN - GCFC2 GC-rich sequence DNA-binding factor 2          | 0 | 0.75 | #DIV/0! |
| Q15008 | PSMD6 | HUMAN - PSMD6 26S proteasome non-ATPase regulatory subu      | 0 | 0.75 | #DIV/0! |
| P55212 | CASP6 | HUMAN - CASP6 Caspase-6                                      | 0 | 0.75 | #DIV/0! |
| O95793 | STAU1 | HUMAN - STAU1 Double-stranded RNA-binding protein Staufen    | 0 | 0.75 | #DIV/0! |
| Q9H9E3 | COG4  | HUMAN - COG4 Conserved oligomeric Golgi complex subunit 4    | 0 | 0.75 | #DIV/0! |
| Q8TD19 | NEK9  | HUMAN - NEK9 Serine/threonine-protein kinase Nek9            | 0 | 0.75 | #DIV/0! |
| P19525 | E2AK2 | HUMAN - EIF2AK2 Interferon-induced, double-stranded RNA-ac   | 0 | 0.75 | #DIV/0! |
| Q9NVR2 | INT10 | HUMAN - INTS10 Integrator complex subunit 10                 | 0 | 0.75 | #DIV/0! |
| O43815 | STRN  | HUMAN - STRN Striatin                                        | 0 | 0.75 | #DIV/0! |
| Q9Y5U2 | TSSC4 | HUMAN - TSSC4 Protein TSSC4                                  | 0 | 0.75 | #DIV/0! |
| Q01970 | PLCB3 | HUMAN - PLCB3 1-phosphatidylinositol 4,5-bisphosphate phosp  | 0 | 0.75 | #DIV/0! |
| Q9NRY5 | F1142 | HUMAN - FAM114A2 Protein FAM114A2                            | 0 | 0.75 | #DIV/0! |
| Q8WW22 | DNJA4 | HUMAN - DNAJA4 DnaJ homolog subfamily A member 4             | 0 | 0.75 | #DIV/0! |
| Q8IYB5 | SMAP1 | HUMAN - SMAP1 Stromal membrane-associated protein 1          | 0 | 0.75 | #DIV/0! |
| Q8TAQ2 | SMRC2 | HUMAN - SMARCC2 SWI/SNF complex subunit SMARCC2              | 0 | 0.75 | #DIV/0! |
| Q9C0I1 | MTMRC | HUMAN - MTMR12 Myotubularin-related protein 12               | 0 | 0.75 | #DIV/0! |
| Q6SZW1 | SARM1 | HUMAN - SARM1 Sterile alpha and TIR motif-containing protein | 0 | 0.75 | #DIV/0! |
| Q9H5H4 | ZN768 | HUMAN - ZNF768 Zinc finger protein 768                       | 0 | 0.75 | #DIV/0! |
| Q9NRY4 | RHG35 | HUMAN - ARHGAP35 Rho GTPase-activating protein 35            | 0 | 0.75 | #DIV/0! |
| Q13111 | CAF1A | HUMAN - CHAF1A Chromatin assembly factor 1 subunit A         | 0 | 0.75 | #DIV/0! |
| Q05209 | PTN12 | HUMAN - PTPN12 Tyrosine-protein phosphatase non-receptor t   | 0 | 0.75 | #DIV/0! |

|        |        |                                                                  |   |      |         |
|--------|--------|------------------------------------------------------------------|---|------|---------|
| Q7Z2W4 | ZCCHV  | HUMAN - ZC3HAV1 Zinc finger CCCH-type antiviral protein 1        | 0 | 0.75 | #DIV/0! |
| P46821 | MAP1B  | HUMAN - MAP1B Microtubule-associated protein 1B                  | 0 | 0.75 | #DIV/0! |
| O43719 | HTSF1  | HUMAN - HTATSF1 HIV Tat-specific factor 1                        | 0 | 0.75 | #DIV/0! |
| Q9BW71 | HIRP3  | HUMAN - HIRIP3 HIRA-interacting protein 3                        | 0 | 0.75 | #DIV/0! |
| Q92796 | DLG3   | HUMAN - DLG3 Disks large homolog 3                               | 0 | 0.75 | #DIV/0! |
| Q9Y547 | HSB11  | HUMAN - HSPB11 Heat shock protein beta-11                        | 0 | 0.75 | #DIV/0! |
| P05198 | IF2A   | HUMAN - EIF2S1 Eukaryotic translation initiation factor 2 subuni | 0 | 0.75 | #DIV/0! |
| Q15257 | PTPA   | HUMAN - PPP2R4 Serine/threonine-protein phosphatase 2A act       | 0 | 0.75 | #DIV/0! |
| P29966 | MARCS  | HUMAN - MARCKS Myristoylated alanine-rich C-kinase substrat      | 0 | 0.75 | #DIV/0! |
| Q06323 | PSME1  | HUMAN - PSME1 Proteasome activator complex subunit 1             | 0 | 0.75 | #DIV/0! |
| P06732 | KCRM   | HUMAN - CKM Creatine kinase M-type                               | 0 | 0.75 | #DIV/0! |
| P45880 | VDAC2  | HUMAN - VDAC2 Voltage-dependent anion-selective channel pr       | 0 | 0.75 | #DIV/0! |
| Q8WUA2 | PPIL4  | HUMAN - PPIL4 Peptidyl-prolyl cis-trans isomerase-like 4         | 0 | 0.75 | #DIV/0! |
| O75439 | MPPB   | HUMAN - PMPCB Mitochondrial-processing peptidase subunit b       | 0 | 0.75 | #DIV/0! |
| P04844 | RPN2   | HUMAN - RPN2 Dolichyl-diphosphooligosaccharide--protein glyco    | 0 | 0.75 | #DIV/0! |
| O43390 | HNRPR  | HUMAN - HNRNPR Heterogeneous nuclear ribonucleoprotein R         | 0 | 0.75 | #DIV/0! |
| P09622 | DLDH   | HUMAN - DLD Dihydrolipoyl dehydrogenase, mitochondrial           | 0 | 0.75 | #DIV/0! |
| A6NE09 | A6NE09 | HUMA - RPSAP58 Protein RPSAP58                                   | 0 | 0.75 | #DIV/0! |
| P04181 | OAT    | HUMAN - OAT Ornithine aminotransferase, mitochondrial            | 0 | 0.75 | #DIV/0! |
| Q8IWX8 | CHERP  | HUMAN - CHERP Calcium homeostasis endoplasmic reticulum p        | 0 | 0.75 | #DIV/0! |
| Q8N1F7 | NUP93  | HUMAN - NUP93 Nuclear pore complex protein Nup93                 | 0 | 0.75 | #DIV/0! |
| Q14156 | EFR3A  | HUMAN - EFR3A Protein EFR3 homolog A                             | 0 | 0.75 | #DIV/0! |
| Q92974 | ARHG2  | HUMAN - ARHGEF2 Rho guanine nucleotide exchange factor 2         | 0 | 0.75 | #DIV/0! |
| Q15392 | DHC24  | HUMAN - DHCR24 Delta(24)-sterol reductase                        | 0 | 0.75 | #DIV/0! |
| Q8NI36 | WDR36  | HUMAN - WDR36 WD repeat-containing protein 36                    | 0 | 0.75 | #DIV/0! |
| Q8TCG1 | CIP2A  | HUMAN - KIAA1524 Protein CIP2A                                   | 0 | 0.75 | #DIV/0! |
| P16615 | AT2A2  | HUMAN - ATP2A2 Sarcoplasmic/endoplasmic reticulum calcium        | 0 | 0.75 | #DIV/0! |
| Q9GZR7 | DDX24  | HUMAN - DDX24 ATP-dependent RNA helicase DDX24                   | 0 | 0.75 | #DIV/0! |
| P51659 | DHB4   | HUMAN - HSD17B4 Peroxisomal multifunctional enzyme type 2        | 0 | 0.75 | #DIV/0! |
| O43242 | PSMD3  | HUMAN - PSMD3 26S proteasome non-ATPase regulatory subu          | 0 | 0.75 | #DIV/0! |
| Q9Y263 | PLAP   | HUMAN - PLAA Phospholipase A-2-activating protein                | 0 | 0.75 | #DIV/0! |

|        |          |                                                                 |   |      |         |
|--------|----------|-----------------------------------------------------------------|---|------|---------|
| Q15029 | U5S1     | HUMAN - EFTUD2 116 kDa U5 small nuclear ribonucleoprotein       | 0 | 0.75 | #DIV/0! |
| Q92797 | SYMPK    | HUMAN - SYMPK Symplekin                                         | 0 | 0.75 | #DIV/0! |
| Q13033 | STRN3    | HUMAN - STRN3 Striatin-3                                        | 0 | 0.75 | #DIV/0! |
| P78344 | IF4G2    | HUMAN - EIF4G2 Eukaryotic translation initiation factor 4 gamma | 0 | 0.75 | #DIV/0! |
| Q8NCE2 | MTMRE    | HUMAN - MTMR14 Myotubularin-related protein 14                  | 0 | 0.75 | #DIV/0! |
| Q96KP1 | EXOC2    | HUMAN - EXOC2 Exocyst complex component 2                       | 0 | 0.75 | #DIV/0! |
| Q9HCE1 | MOV10    | HUMAN - MOV10 Putative helicase MOV-10                          | 0 | 0.75 | #DIV/0! |
| P17480 | UBF - U1 | HUMAN - Nucleolar transcription factor 1                        | 0 | 0.75 | #DIV/0! |
| P08237 | K6PF     | HUMAN - PFKM 6-phosphofructokinase, muscle type                 | 0 | 0.75 | #DIV/0! |
| Q9P265 | DIP2B    | HUMAN - DIP2B Disco-interacting protein 2 homolog B             | 0 | 0.75 | #DIV/0! |
| P54652 | HSP72    | HUMAN - HSPA2 Heat shock-related 70 kDa protein 2               | 0 | 0.75 | #DIV/0! |
| Q8N110 | DOCK4    | HUMAN - DOCK4 Dedicator of cytokinesis protein 4                | 0 | 0.75 | #DIV/0! |
| O75122 | CLAP2    | HUMAN - CLASP2 CLIP-associating protein 2                       | 0 | 0.75 | #DIV/0! |
| Q9Y5B9 | SP16H    | HUMAN - SUPT16H FACT complex subunit SPT16                      | 0 | 0.75 | #DIV/0! |
| Q9Y6D5 | BIG2     | HUMAN - ARFGEF2 Brefeldin A-inhibited guanine nucleotide-ex     | 0 | 0.75 | #DIV/0! |
| Q8IX18 | DHX40    | HUMAN - DHX40 Probable ATP-dependent RNA helicase DHX4          | 0 | 0.75 | #DIV/0! |
| Q6Y7W6 | PERQ2    | HUMAN - GIGYF2 PERQ amino acid-rich with GYF domain-cont        | 0 | 0.75 | #DIV/0! |
| Q9NR30 | DDX21    | HUMAN - DDX21 Nucleolar RNA helicase 2                          | 0 | 0.75 | #DIV/0! |
| Q9Y5A9 | YTHD2    | HUMAN - YTHDF2 YTH domain family protein 2                      | 0 | 0.75 | #DIV/0! |
| P42356 | PI4KA    | HUMAN - PI4KA Phosphatidylinositol 4-kinase alpha               | 0 | 0.75 | #DIV/0! |
| P52948 | NUP98    | HUMAN - NUP98 Nuclear pore complex protein Nup98-Nup96          | 0 | 0.75 | #DIV/0! |
| Q13813 | SPTN1    | HUMAN - SPTAN1 Spectrin alpha chain, non-erythrocytic 1         | 0 | 0.75 | #DIV/0! |
| Q8N201 | INT1     | HUMAN - INTS1 Integrator complex subunit 1                      | 0 | 0.75 | #DIV/0! |
| Q3KQU3 | MA7D1    | HUMAN - MAP7D1 MAP7 domain-containing protein 1                 | 0 | 0.75 | #DIV/0! |
| O00411 | RPOM     | HUMAN - POLRMT DNA-directed RNA polymerase, mitochondri         | 0 | 0.75 | #DIV/0! |
| A6NHR9 | SMHD1    | HUMAN - SMCHD1 Structural maintenance of chromosomes fle        | 0 | 0.75 | #DIV/0! |
| P50748 | KNTC1    | HUMAN - KNTC1 Kinetochores-associated protein 1                 | 0 | 0.75 | #DIV/0! |
| Q709C8 | VP13C    | HUMAN - VPS13C Vacuolar protein sorting-associated protein 1    | 0 | 0.75 | #DIV/0! |
| Q562R1 | ACTBL    | HUMAN - ACTBL2 Beta-actin-like protein 2                        | 0 | 0.75 | #DIV/0! |
| P24390 | ERD21    | HUMAN - KDELR1 ER lumen protein retaining receptor 1            | 0 | 0.75 | #DIV/0! |
| Q01968 | OCRL     | HUMAN - OCRL Inositol polyphosphate 5-phosphatase OCRL-1        | 0 | 0.75 | #DIV/0! |

|        |          |                                                               |   |      |         |
|--------|----------|---------------------------------------------------------------|---|------|---------|
| Q99436 | PSB7     | HUMAN - PSMB7 Proteasome subunit beta type-7                  | 0 | 0.75 | #DIV/0! |
| P05023 | AT1A1    | HUMAN - ATP1A1 Sodium/potassium-transporting ATPase subu      | 0 | 0.75 | #DIV/0! |
| O43149 | ZZEF1    | HUMAN - ZZEF1 Zinc finger ZZ-type and EF-hand domain-conta    | 0 | 0.75 | #DIV/0! |
| P40855 | PEX19    | HUMAN - PEX19 Peroxisomal biogenesis factor 19                | 0 | 0.5  | #DIV/0! |
| Q96G28 | CC104    | HUMAN - CCDC104 Coiled-coil domain-containing protein 104     | 0 | 0.5  | #DIV/0! |
| Q03111 | ENL - MI | HUMAN -T1 Protein ENL                                         | 0 | 0.5  | #DIV/0! |
| Q9H773 | DCTP1    | HUMAN - DCTPP1 dCTP pyrophosphatase 1                         | 0 | 0.5  | #DIV/0! |
| P49354 | FNTA     | HUMAN - FNTA Protein farnesyltransferase/geranylgeranyltrans  | 0 | 0.5  | #DIV/0! |
| H0YE66 | H0YE66   | HUMAN - Uncharacterized protein                               | 0 | 0.5  | #DIV/0! |
| Q1ET66 | Q1ET66   | HUMAN - ST1A5 Phenol sulfotransferase 1A5*1A possible alteri  | 0 | 0.5  | #DIV/0! |
| P19338 | NUC - N  | HUMAN - Nucleolin                                             | 0 | 0.5  | #DIV/0! |
| Q99733 | NP1L4    | HUMAN - NAP1L4 Nucleosome assembly protein 1-like 4           | 0 | 0.5  | #DIV/0! |
| Q96CN7 | ISOC1    | HUMAN - ISOC1 Isochorismatase domain-containing protein 1     | 0 | 0.5  | #DIV/0! |
| Q8N4J0 | CI041    | HUMAN - C9orf41 UPF0586 protein C9orf41                       | 0 | 0.5  | #DIV/0! |
| Q96EB6 | SIR1     | HUMAN - SIRT1 NAD-dependent protein deacetylase sirtuin-1     | 0 | 0.5  | #DIV/0! |
| Q9NP61 | ARFG3    | HUMAN - ARFGAP3 ADP-ribosylation factor GTPase-activating     | 0 | 0.5  | #DIV/0! |
| Q5R372 | RBG1L    | HUMAN - RABGAP1L Rab GTPase-activating protein 1-like         | 0 | 0.5  | #DIV/0! |
| P38432 | COIL     | HUMAN - COIL Coilin                                           | 0 | 0.5  | #DIV/0! |
| Q9NQ75 | CASS4    | HUMAN - CASS4 Cas scaffolding protein family member 4         | 0 | 0.5  | #DIV/0! |
| O15111 | IKKA     | HUMAN - CHUK Inhibitor of nuclear factor kappa-B kinase subui | 0 | 0.5  | #DIV/0! |
| Q9NXH9 | TRM1     | HUMAN - TRMT1 tRNA (guanine(26)-N(2))-dimethyltransferase     | 0 | 0.5  | #DIV/0! |
| Q14677 | EPN4     | HUMAN - CLINT1 Clathrin interactor 1                          | 0 | 0.5  | #DIV/0! |
| P06400 | RB       | HUMAN - RB1 Retinoblastoma-associated protein                 | 0 | 0.5  | #DIV/0! |
| Q8IY67 | RAVR1    | HUMAN - RAVR1 Ribonucleoprotein PTB-binding 1                 | 0 | 0.5  | #DIV/0! |
| Q641Q2 | FA21A    | HUMAN - FAM21A WASH complex subunit FAM21A                    | 0 | 0.5  | #DIV/0! |
| Q17RW2 | COO - C  | HUMAN -Collagen alpha-1(XXIV) chain                           | 0 | 0.5  | #DIV/0! |
| Q14028 | CNG - C  | HUMAN -Cyclic nucleotide-gated cation channel beta-1          | 0 | 0.5  | #DIV/0! |
| Q86VF7 | NRAP     | HUMAN - NRAP Nebulin-related-anchoring protein                | 0 | 0.5  | #DIV/0! |
| A8TX70 | CO6A5    | HUMAN - COL6A5 Collagen alpha-5(VI) chain                     | 0 | 0.5  | #DIV/0! |
| Q15154 | PCM - P  | HUMAN -Pericentriolar material 1 protein                      | 0 | 0.5  | #DIV/0! |
| Q5HYC2 | K2026    | HUMAN - KIAA2026 Uncharacterized protein KIAA2026             | 0 | 0.5  | #DIV/0! |

|        |          |                                                                |   |     |         |
|--------|----------|----------------------------------------------------------------|---|-----|---------|
| P62891 | RL39     | HUMAN - RPL39 60S ribosomal protein L39                        | 0 | 0.5 | #DIV/0! |
| Q16778 | H2B2E    | HUMAN - HIST2H2BE Histone H2B type 2-E                         | 0 | 0.5 | #DIV/0! |
| Q99880 | H2B1L    | HUMAN - HIST1H2BL Histone H2B type 1-L                         | 0 | 0.5 | #DIV/0! |
| Q99879 | H2B1M    | HUMAN - HIST1H2BM Histone H2B type 1-M                         | 0 | 0.5 | #DIV/0! |
| Q8N257 | H2B3B    | HUMAN - HIST3H2BB Histone H2B type 3-B                         | 0 | 0.5 | #DIV/0! |
| Q5QNW6 | H2B2F    | HUMAN - HIST2H2BF Histone H2B type 2-F                         | 0 | 0.5 | #DIV/0! |
| P07305 | H10      | HUMAN - H1F0 Histone H1.0                                      | 0 | 0.5 | #DIV/0! |
| Q9NQG5 | RPR1B    | HUMAN - RPRD1B Regulation of nuclear pre-mRNA domain-co        | 0 | 0.5 | #DIV/0! |
| Q5SRE7 | PHYD1    | HUMAN - PHYHD1 Phytanoyl-CoA dioxygenase domain-contain        | 0 | 0.5 | #DIV/0! |
| Q96SI1 | KCD15    | HUMAN - KCTD15 BTB/POZ domain-containing protein KCTD1!        | 0 | 0.5 | #DIV/0! |
| P32929 | CGL      | HUMAN - CTH Cystathionine gamma-lyase                          | 0 | 0.5 | #DIV/0! |
| Q96P16 | RPR1A    | HUMAN - RPRD1A Regulation of nuclear pre-mRNA domain-co        | 0 | 0.5 | #DIV/0! |
| O96019 | ACL6A    | HUMAN - ACTL6A Actin-like protein 6A                           | 0 | 0.5 | #DIV/0! |
| Q7Z5L9 | I2BP2    | HUMAN - IRF2BP2 Interferon regulatory factor 2-binding protein | 0 | 0.5 | #DIV/0! |
| Q96A49 | SYAP1    | HUMAN - SYAP1 Synapse-associated protein 1                     | 0 | 0.5 | #DIV/0! |
| Q9Y6K9 | NEMO     | HUMAN - IKBKG NF-kappa-B essential modulator                   | 0 | 0.5 | #DIV/0! |
| Q9BSU1 | CP070    | HUMAN - C16orf70 UPF0183 protein C16orf70                      | 0 | 0.5 | #DIV/0! |
| Q15025 | TNI - TN | HUMAN- TNFAIP3-interacting protein 1                           | 0 | 0.5 | #DIV/0! |
| P60660 | MYL6     | HUMAN - MYL6 Myosin light polypeptide 6                        | 0 | 0.5 | #DIV/0! |
| P27695 | APEX1    | HUMAN - APEX1 DNA-(apurinic or apyrimidinic site) lyase        | 0 | 0.5 | #DIV/0! |
| P24941 | CDK2     | HUMAN - CDK2 Cyclin-dependent kinase 2                         | 0 | 0.5 | #DIV/0! |
| P07741 | APT      | HUMAN - APRT Adenine phosphoribosyltransferase                 | 0 | 0.5 | #DIV/0! |
| O00401 | WASL     | HUMAN - WASL Neural Wiskott-Aldrich syndrome protein           | 0 | 0.5 | #DIV/0! |
| Q9BR61 | ACBD6    | HUMAN - ACBD6 Acyl-CoA-binding domain-containing protein 6     | 0 | 0.5 | #DIV/0! |
| Q9UL25 | RAB21    | HUMAN - RAB21 Ras-related protein Rab-21                       | 0 | 0.5 | #DIV/0! |
| P45984 | MK09     | HUMAN - MAPK9 Mitogen-activated protein kinase 9               | 0 | 0.5 | #DIV/0! |
| Q96MC2 | CC1 - C  | HUMAN - Coiled-coil domain-containing protein 164              | 0 | 0.5 | #DIV/0! |
| Q14258 | TRI - TR | HUMAN -E3 ubiquitin/ISG15 ligase TRIM25                        | 0 | 0.5 | #DIV/0! |
| Q96SW2 | CRBN     | HUMAN - CRBN Protein cereblon                                  | 0 | 0.5 | #DIV/0! |
| Q9BZG8 | DPH1     | HUMAN - DPH1 Diphthamide biosynthesis protein 1                | 0 | 0.5 | #DIV/0! |
| Q9BR76 | COR1B    | HUMAN - CORO1B Coronin-1B                                      | 0 | 0.5 | #DIV/0! |

|        |         |                                                                  |   |     |         |
|--------|---------|------------------------------------------------------------------|---|-----|---------|
| Q9UHR4 | BI2L1   | HUMAN - BAIAP2L1 Brain-specific angiogenesis inhibitor 1-asc     | 0 | 0.5 | #DIV/0! |
| P10321 | 1C07    | HUMAN - HLA-C HLA class I histocompatibility antigen, Cw-7 al    | 0 | 0.5 | #DIV/0! |
| F8VZB9 | F8VZB9  | HUMA - HLA-C HLA class I histocompatibility antigen, Cw-14 al    | 0 | 0.5 | #DIV/0! |
| Q9NPD3 | EXOS4   | HUMAN - EXOSC4 Exosome complex component RRP41                   | 0 | 0.5 | #DIV/0! |
| Q9H223 | EHD4    | HUMAN - EHD4 EH domain-containing protein 4                      | 0 | 0.5 | #DIV/0! |
| O43765 | SGTA    | HUMAN - SGTA Small glutamine-rich tetratricopeptide repeat-co    | 0 | 0.5 | #DIV/0! |
| Q14493 | SLBP    | HUMAN - SLBP Histone RNA hairpin-binding protein                 | 0 | 0.5 | #DIV/0! |
| P60228 | EIF3E   | HUMAN - EIF3E Eukaryotic translation initiation factor 3 subunit | 0 | 0.5 | #DIV/0! |
| O60832 | DKC1    | HUMAN - DKC1 H/ACA ribonucleoprotein complex subunit 4           | 0 | 0.5 | #DIV/0! |
| Q96FJ0 | STALP   | HUMAN - STAMBPL1 AMSH-like protease                              | 0 | 0.5 | #DIV/0! |
| Q53H96 | P5CR3   | HUMAN - PYCRL Pyrroline-5-carboxylate reductase 3                | 0 | 0.5 | #DIV/0! |
| O94763 | RMP     | HUMAN - URI1 Unconventional prefoldin RPB5 interactor 1          | 0 | 0.5 | #DIV/0! |
| Q9ULX3 | NOB1    | HUMAN - NOB1 RNA-binding protein NOB1                            | 0 | 0.5 | #DIV/0! |
| Q96I24 | FUBP3   | HUMAN - FUBP3 Far upstream element-binding protein 3             | 0 | 0.5 | #DIV/0! |
| Q68CZ6 | HAUS3   | HUMAN - HAUS3 HAUS augmin-like complex subunit 3                 | 0 | 0.5 | #DIV/0! |
| P61160 | ARP2    | HUMAN - ACTR2 Actin-related protein 2                            | 0 | 0.5 | #DIV/0! |
| Q9H089 | LSG1    | HUMAN - LSG1 Large subunit GTPase 1 homolog                      | 0 | 0.5 | #DIV/0! |
| Q9H6T3 | RPAP3   | HUMAN - RPAP3 RNA polymerase II-associated protein 3             | 0 | 0.5 | #DIV/0! |
| O43524 | FOXO3   | HUMAN - FOXO3 Forkhead box protein O3                            | 0 | 0.5 | #DIV/0! |
| Q6UWX4 | HIPL2   | HUMAN - HHIPL2 HHIP-like protein 2                               | 0 | 0.5 | #DIV/0! |
| Q8TAF3 | WDR48   | HUMAN - WDR48 WD repeat-containing protein 48                    | 0 | 0.5 | #DIV/0! |
| Q8WUX9 | CHMP7   | HUMAN - CHMP7 Charged multivesicular body protein 7              | 0 | 0.5 | #DIV/0! |
| Q9UH65 | SWP70   | HUMAN - SWAP70 Switch-associated protein 70                      | 0 | 0.5 | #DIV/0! |
| O00186 | STXB3   | HUMAN - STXBP3 Syntaxin-binding protein 3                        | 0 | 0.5 | #DIV/0! |
| Q6NT55 | CP4 - C | HUMAN - Cytochrome P450 4F22                                     | 0 | 0.5 | #DIV/0! |
| Q13153 | PAK1    | HUMAN - PAK1 Serine/threonine-protein kinase PAK 1               | 0 | 0.5 | #DIV/0! |
| Q96C86 | DCPS    | HUMAN - DCPS m7GpppX diphosphatase                               | 0 | 0.5 | #DIV/0! |
| P42575 | CASP2   | HUMAN - CASP2 Caspase-2                                          | 0 | 0.5 | #DIV/0! |
| Q9UQ80 | PA2G4   | HUMAN - PA2G4 Proliferation-associated protein 2G4               | 0 | 0.5 | #DIV/0! |
| Q6UXZ4 | UNC - U | HUMAN - Netrin receptor UNC5D                                    | 0 | 0.5 | #DIV/0! |
| Q9H1B7 | I2BPL   | HUMAN - IRF2BPL Interferon regulatory factor 2-binding protein   | 0 | 0.5 | #DIV/0! |



|        |           |                                                                      |   |     |         |
|--------|-----------|----------------------------------------------------------------------|---|-----|---------|
| Q96AC1 | FERM2     | HUMAN - FERMT2 Fermitin family homolog 2                             | 0 | 0.5 | #DIV/0! |
| Q9BRR6 | ADPGK     | HUMAN - ADPGK ADP-dependent glucokinase                              | 0 | 0.5 | #DIV/0! |
| Q96HS1 | PGAM5     | HUMAN - PGAM5 Serine/threonine-protein phosphatase PGAM5             | 0 | 0.5 | #DIV/0! |
| Q9UJX2 | CDC23     | HUMAN - CDC23 Cell division cycle protein 23 homolog                 | 0 | 0.5 | #DIV/0! |
| Q9H0W9 | CK054     | HUMAN - C11orf54 Ester hydrolase C11orf54                            | 0 | 0.5 | #DIV/0! |
| P83436 | COG7      | HUMAN - COG7 Conserved oligomeric Golgi complex subunit 7            | 0 | 0.5 | #DIV/0! |
| P52272 | HNRPM     | HUMAN - HNRNPM Heterogeneous nuclear ribonucleoprotein M             | 0 | 0.5 | #DIV/0! |
| Q9UFC0 | LRWD1     | HUMAN - LRWD1 Leucine-rich repeat and WD repeat-containing protein 1 | 0 | 0.5 | #DIV/0! |
| Q14181 | DPOA2     | HUMAN - POLA2 DNA polymerase alpha subunit B                         | 0 | 0.5 | #DIV/0! |
| Q96RN5 | MED15     | HUMAN - MED15 Mediator of RNA polymerase II transcription subunit 15 | 0 | 0.5 | #DIV/0! |
| Q4J6C6 | PPCEL     | HUMAN - PREPL Prolyl endopeptidase-like                              | 0 | 0.5 | #DIV/0! |
| O75449 | KTNA1     | HUMAN - KATNA1 Katanin p60 ATPase-containing subunit A1              | 0 | 0.5 | #DIV/0! |
| Q9H900 | ZWILC     | HUMAN - ZWILCH Protein zwilch homolog                                | 0 | 0.5 | #DIV/0! |
| Q53EL6 | PDCD4     | HUMAN - PDCD4 Programmed cell death protein 4                        | 0 | 0.5 | #DIV/0! |
| Q8WU79 | SMAP2     | HUMAN - SMAP2 Stromal membrane-associated protein 2                  | 0 | 0.5 | #DIV/0! |
| Q9UK59 | DBR1      | HUMAN - DBR1 Lariat debranching enzyme                               | 0 | 0.5 | #DIV/0! |
| P05787 | K2C8      | HUMAN - KRT8 Keratin, type II cytoskeletal 8                         | 0 | 0.5 | #DIV/0! |
| Q5GLZ8 | HERC4     | HUMAN - HERC4 Probable E3 ubiquitin-protein ligase HERC4             | 0 | 0.5 | #DIV/0! |
| O75475 | PSIP1     | HUMAN - PSIP1 PC4 and SFRS1-interacting protein                      | 0 | 0.5 | #DIV/0! |
| P21399 | ACOC      | HUMAN - ACO1 Cytoplasmic aconitate hydratase                         | 0 | 0.5 | #DIV/0! |
| Q9UJX6 | ANC2      | HUMAN - ANAPC2 Anaphase-promoting complex subunit 2                  | 0 | 0.5 | #DIV/0! |
| Q32MZ4 | LRRF1     | HUMAN - LRRFIP1 Leucine-rich repeat flightless-interacting protein 1 | 0 | 0.5 | #DIV/0! |
| P35611 | ADDA      | HUMAN - ADD1 Alpha-adducin                                           | 0 | 0.5 | #DIV/0! |
| Q6P4I2 | WDR73     | HUMAN - WDR73 WD repeat-containing protein 73                        | 0 | 0.5 | #DIV/0! |
| Q96T21 | SEB - SEB | HUMAN - Selenocysteine insertion sequence-binding protein 2          | 0 | 0.5 | #DIV/0! |
| P29353 | SHC1      | HUMAN - SHC1 SHC-transforming protein 1                              | 0 | 0.5 | #DIV/0! |
| Q96HW7 | INT4      | HUMAN - INTS4 Integrator complex subunit 4                           | 0 | 0.5 | #DIV/0! |
| Q96PE3 | INP4A     | HUMAN - INPP4A Type I inositol 3,4-bisphosphate 4-phosphatase        | 0 | 0.5 | #DIV/0! |
| Q8N8S7 | ENAH      | HUMAN - ENAH Protein enabled homolog                                 | 0 | 0.5 | #DIV/0! |
| O94804 | STK10     | HUMAN - STK10 Serine/threonine-protein kinase 10                     | 0 | 0.5 | #DIV/0! |
| Q9NVU7 | SDA1      | HUMAN - SDAD1 Protein SDA1 homolog                                   | 0 | 0.5 | #DIV/0! |

|        |          |                                                               |   |     |         |
|--------|----------|---------------------------------------------------------------|---|-----|---------|
| Q9BY44 | EIF2A    | HUMAN - EIF2A Eukaryotic translation initiation factor 2A     | 0 | 0.5 | #DIV/0! |
| O60870 | KIN17    | HUMAN - KIN DNA/RNA-binding protein KIN17                     | 0 | 0.5 | #DIV/0! |
| Q8WUA4 | TF3C2    | HUMAN - GTF3C2 General transcription factor 3C polypeptide 2  | 0 | 0.5 | #DIV/0! |
| O95260 | ATE1     | HUMAN - ATE1 Arginyl-tRNA--protein transferase 1              | 0 | 0.5 | #DIV/0! |
| O60282 | KIF5C    | HUMAN - KIF5C Kinesin heavy chain isoform 5C                  | 0 | 0.5 | #DIV/0! |
| O14787 | TNPO2    | HUMAN - TNPO2 Transportin-2                                   | 0 | 0.5 | #DIV/0! |
| Q05086 | UBE3A    | HUMAN - UBE3A Ubiquitin-protein ligase E3A                    | 0 | 0.5 | #DIV/0! |
| Q96HR8 | NAF1     | HUMAN - NAF1 H/ACA ribonucleoprotein complex non-core sub     | 0 | 0.5 | #DIV/0! |
| Q9Y4L1 | HYOU1    | HUMAN - HYOU1 Hypoxia up-regulated protein 1                  | 0 | 0.5 | #DIV/0! |
| Q9BVJ6 | UT14A    | HUMAN - UTP14A U3 small nucleolar RNA-associated protein 1    | 0 | 0.5 | #DIV/0! |
| Q8TDD1 | DDX54    | HUMAN - DDX54 ATP-dependent RNA helicase DDX54                | 0 | 0.5 | #DIV/0! |
| O75914 | PAK3     | HUMAN - PAK3 Serine/threonine-protein kinase PAK 3            | 0 | 0.5 | #DIV/0! |
| P31751 | AKT2     | HUMAN - AKT2 RAC-beta serine/threonine-protein kinase         | 0 | 0.5 | #DIV/0! |
| Q96A65 | EXOC4    | HUMAN - EXOC4 Exocyst complex component 4                     | 0 | 0.5 | #DIV/0! |
| Q7Z6E9 | RBB - RI | HUMAN - E3 ubiquitin-protein ligase RBBP6                     | 0 | 0.5 | #DIV/0! |
| Q96ST3 | SIN3A    | HUMAN - SIN3A Paired amphipathic helix protein Sin3a          | 0 | 0.5 | #DIV/0! |
| P57678 | GEMI4    | HUMAN - GEMIN4 Gem-associated protein 4                       | 0 | 0.5 | #DIV/0! |
| Q659A1 | NAR - N  | HUMAN - NMDA receptor-regulated protein 2                     | 0 | 0.5 | #DIV/0! |
| Q9H2U1 | DHX36    | HUMAN - DHX36 Probable ATP-dependent RNA helicase DHX3        | 0 | 0.5 | #DIV/0! |
| Q08379 | GOGA2    | HUMAN - GOLGA2 Golgin subfamily A member 2                    | 0 | 0.5 | #DIV/0! |
| P42229 | STA5A    | HUMAN - STAT5A Signal transducer and activator of transcrip   | 0 | 0.5 | #DIV/0! |
| Q9C0D4 | Z51 - ZN | HUMAN -Zinc finger protein 518B                               | 0 | 0.5 | #DIV/0! |
| Q38SD2 | LRRK1    | HUMAN - LRRK1 Leucine-rich repeat serine/threonine-protein ki | 0 | 0.5 | #DIV/0! |
| Q6IN85 | P4R3A    | HUMAN - SMEK1 Serine/threonine-protein phosphatase 4 regul    | 0 | 0.5 | #DIV/0! |
| Q5XPI4 | RN123    | HUMAN - RNF123 E3 ubiquitin-protein ligase RNF123             | 0 | 0.5 | #DIV/0! |
| A6NNT2 | CP096    | HUMAN - C16orf96 Putative uncharacterized protein C16orf96    | 0 | 0.5 | #DIV/0! |
| Q15910 | EZH2     | HUMAN - EZH2 Histone-lysine N-methyltransferase EZH2          | 0 | 0.5 | #DIV/0! |
| P09884 | DPOLA    | HUMAN - POLA1 DNA polymerase alpha catalytic subunit          | 0 | 0.5 | #DIV/0! |
| Q96K76 | UBP47    | HUMAN - USP47 Ubiquitin carboxyl-terminal hydrolase 47        | 0 | 0.5 | #DIV/0! |
| Q07157 | ZO1      | HUMAN - TJP1 Tight junction protein ZO-1                      | 0 | 0.5 | #DIV/0! |
| Q9ULG1 | INO80    | HUMAN - INO80 DNA helicase INO80                              | 0 | 0.5 | #DIV/0! |

|        |          |                                                               |   |     |         |
|--------|----------|---------------------------------------------------------------|---|-----|---------|
| Q9ULJ7 | ANR50    | HUMAN - ANKRD50 Ankyrin repeat domain-containing protein 5    | 0 | 0.5 | #DIV/0! |
| Q6F5E8 | LR16C    | HUMAN - RLTPR Leucine-rich repeat-containing protein 16C      | 0 | 0.5 | #DIV/0! |
| Q9HCS7 | SYF1     | HUMAN - XAB2 Pre-mRNA-splicing factor SYF1                    | 0 | 0.5 | #DIV/0! |
| Q96T88 | UHRF1    | HUMAN - UHRF1 E3 ubiquitin-protein ligase UHRF1               | 0 | 0.5 | #DIV/0! |
| Q562E7 | WDR81    | HUMAN - WDR81 WD repeat-containing protein 81                 | 0 | 0.5 | #DIV/0! |
| Q8IZ69 | TRM2A    | HUMAN - TRMT2A tRNA (uracil-5-)-methyltransferase homolog     | 0 | 0.5 | #DIV/0! |
| Q15772 | SPEG     | HUMAN - SPEG Striated muscle preferentially expressed proteir | 0 | 0.5 | #DIV/0! |
| Q8TE73 | DYH - DI | HUMAN - Dynein heavy chain 5, axonemal                        | 0 | 0.5 | #DIV/0! |
| Q96N67 | DOCK7    | HUMAN - DOCK7 Deducator of cytokinesis protein 7              | 0 | 0.5 | #DIV/0! |
| O14686 | MLL - MI | HUMAN -Histone-lysine N-methyltransferase MLL2                | 0 | 0.5 | #DIV/0! |
| Q03164 | MLL1     | HUMAN - MLL Histone-lysine N-methyltransferase MLL            | 0 | 0.5 | #DIV/0! |
| Q8NF91 | SYNE1    | HUMAN - SYNE1 Nesprin-1                                       | 0 | 0.5 | #DIV/0! |
| P49459 | UBE2A    | HUMAN - UBE2A Ubiquitin-conjugating enzyme E2 A               | 0 | 0.5 | #DIV/0! |
| P10412 | H14 - HI | HUMAN - Histone H1.4                                          | 0 | 0.5 | #DIV/0! |
| Q99720 | SGMR1    | HUMAN - SIGMAR1 Sigma non-opioid intracellular receptor 1     | 0 | 0.5 | #DIV/0! |
| Q9NWX4 | CA123    | HUMAN - C1orf123 UPF0587 protein C1orf123                     | 0 | 0.5 | #DIV/0! |
| Q6P5R6 | RL22L    | HUMAN - RPL22L1 60S ribosomal protein L22-like 1              | 0 | 0.5 | #DIV/0! |
| P16402 | H13 - HI | HUMAN - Histone H1.3                                          | 0 | 0.5 | #DIV/0! |
| O75431 | MTX2     | HUMAN - MTX2 Metaxin-2                                        | 0 | 0.5 | #DIV/0! |
| Q8TCD5 | NT5C     | HUMAN - NT5C 5'(3')-deoxyribonucleotidase, cytosolic type     | 0 | 0.5 | #DIV/0! |
| Q9Y676 | RT18B    | HUMAN - MRPS18B 28S ribosomal protein S18b, mitochondrial     | 0 | 0.5 | #DIV/0! |
| Q16836 | HCDH     | HUMAN - HADH Hydroxyacyl-coenzyme A dehydrogenase, mito       | 0 | 0.5 | #DIV/0! |
| P28072 | PSB6     | HUMAN - PSMB6 Proteasome subunit beta type-6                  | 0 | 0.5 | #DIV/0! |
| P61106 | RAB14    | HUMAN - RAB14 Ras-related protein Rab-14                      | 0 | 0.5 | #DIV/0! |
| Q15654 | TRIP6    | HUMAN - TRIP6 Thyroid receptor-interacting protein 6          | 0 | 0.5 | #DIV/0! |
| P61086 | UBE2K    | HUMAN - UBE2K Ubiquitin-conjugating enzyme E2 K               | 0 | 0.5 | #DIV/0! |
| P05386 | RLA1     | HUMAN - RPLP1 60S acidic ribosomal protein P1                 | 0 | 0.5 | #DIV/0! |
| Q969G6 | RIFK     | HUMAN - RFK Riboflavin kinase                                 | 0 | 0.5 | #DIV/0! |
| P78346 | RPP30    | HUMAN - RPP30 Ribonuclease P protein subunit p30              | 0 | 0.5 | #DIV/0! |
| P78406 | RAE1L    | HUMAN - RAE1 mRNA export factor                               | 0 | 0.5 | #DIV/0! |
| Q9HAV7 | GRPE1    | HUMAN - GRPEL1 GrpE protein homolog 1, mitochondrial          | 0 | 0.5 | #DIV/0! |

|        |         |                                                             |   |     |         |
|--------|---------|-------------------------------------------------------------|---|-----|---------|
| Q9UK58 | CCN - C | HUMAN -1 Cyclin-L1                                          | 0 | 0.5 | #DIV/0! |
| P61586 | RHOA    | HUMAN - RHOA Transforming protein RhoA                      | 0 | 0.5 | #DIV/0! |
| Q15056 | IF4H    | HUMAN - EIF4H Eukaryotic translation initiation factor 4H   | 0 | 0.5 | #DIV/0! |
| Q99447 | PCY2    | HUMAN - PCYT2 Ethanolamine-phosphate cytidyltransferase     | 0 | 0.5 | #DIV/0! |
| P48382 | RFX5    | HUMAN - RFX5 DNA-binding protein RFX5                       | 0 | 0.5 | #DIV/0! |
| P11766 | ADHX    | HUMAN - ADH5 Alcohol dehydrogenase class-3                  | 0 | 0.5 | #DIV/0! |
| P68400 | CSK21   | HUMAN - CSNK2A1 Casein kinase II subunit alpha              | 0 | 0.5 | #DIV/0! |
| O75915 | PRAF3   | HUMAN - ARL6IP5 PRA1 family protein 3                       | 0 | 0.5 | #DIV/0! |
| Q14914 | PTGR1   | HUMAN - PTGR1 Prostaglandin reductase 1                     | 0 | 0.5 | #DIV/0! |
| Q9GZZ9 | UBA5    | HUMAN - UBA5 Ubiquitin-like modifier-activating enzyme 5    | 0 | 0.5 | #DIV/0! |
| O43237 | DC1L2   | HUMAN - DYNC1LI2 Cytoplasmic dynein 1 light intermediate ch | 0 | 0.5 | #DIV/0! |
| P30042 | ES1     | HUMAN - C21orf33 ES1 protein homolog, mitochondrial         | 0 | 0.5 | #DIV/0! |
| H7C455 | H7C455  | HUMA - Uncharacterized protein                              | 0 | 0.5 | #DIV/0! |
| P21283 | VATC1   | HUMAN - ATP6V1C1 V-type proton ATPase subunit C 1           | 0 | 0.5 | #DIV/0! |
| Q8N9N7 | LRC57   | HUMAN - LRRC57 Leucine-rich repeat-containing protein 57    | 0 | 0.5 | #DIV/0! |
| Q12972 | PP1R8   | HUMAN - PPP1R8 Nuclear inhibitor of protein phosphatase 1   | 0 | 0.5 | #DIV/0! |
| Q16629 | SRSF7   | HUMAN - SRSF7 Serine/arginine-rich splicing factor 7        | 0 | 0.5 | #DIV/0! |
| O14745 | NHRF1   | HUMAN - SLC9A3R1 Na(+)/H(+) exchange regulatory cofactor N  | 0 | 0.5 | #DIV/0! |
| P34913 | HYES    | HUMAN - EPHX2 Bifunctional epoxide hydrolase 2              | 0 | 0.5 | #DIV/0! |
| P62195 | PRS8    | HUMAN - PSMC5 26S protease regulatory subunit 8             | 0 | 0.5 | #DIV/0! |
| P49585 | PCY1A   | HUMAN - PCYT1A Choline-phosphate cytidyltransferase A       | 0 | 0.5 | #DIV/0! |
| Q99729 | ROAA    | HUMAN - HNRNPAB Heterogeneous nuclear ribonucleoprotein ,   | 0 | 0.5 | #DIV/0! |
| Q7Z4H3 | HDDC2   | HUMAN - HDDC2 HD domain-containing protein 2                | 0 | 0.5 | #DIV/0! |
| P62191 | PRS4    | HUMAN - PSMC1 26S protease regulatory subunit 4             | 0 | 0.5 | #DIV/0! |
| P30419 | NMT1    | HUMAN - NMT1 Glycylpeptide N-tetradecanoyltransferase 1     | 0 | 0.5 | #DIV/0! |
| Q15942 | ZYX     | HUMAN - ZYX Zyxin                                           | 0 | 0.5 | #DIV/0! |
| P61158 | ARP3    | HUMAN - ACTR3 Actin-related protein 3                       | 0 | 0.5 | #DIV/0! |
| O15270 | SPTC2   | HUMAN - SPTLC2 Serine palmitoyltransferase 2                | 0 | 0.5 | #DIV/0! |
| O15460 | P4HA2   | HUMAN - P4HA2 Prolyl 4-hydroxylase subunit alpha-2          | 0 | 0.5 | #DIV/0! |
| Q9Y371 | SHLB1   | HUMAN - SH3GLB1 Endophilin-B1                               | 0 | 0.5 | #DIV/0! |
| Q12852 | M3K12   | HUMAN - MAP3K12 Mitogen-activated protein kinase kinase kin | 0 | 0.5 | #DIV/0! |

|        |       |                                                                 |   |     |         |
|--------|-------|-----------------------------------------------------------------|---|-----|---------|
| P30084 | ECHM  | HUMAN - ECHS1 Enoyl-CoA hydratase, mitochondrial                | 0 | 0.5 | #DIV/0! |
| P15104 | GLNA  | HUMAN - GLUL Glutamine synthetase                               | 0 | 0.5 | #DIV/0! |
| O76075 | DFFB  | HUMAN - DFFB DNA fragmentation factor subunit beta              | 0 | 0.5 | #DIV/0! |
| Q9GZL7 | WDR12 | HUMAN - WDR12 Ribosome biogenesis protein WDR12                 | 0 | 0.5 | #DIV/0! |
| Q9UBQ7 | GRHPR | HUMAN - GRHPR Glyoxylate reductase/hydroxypyruvate reduct       | 0 | 0.5 | #DIV/0! |
| P25789 | PSA4  | HUMAN - PSMA4 Proteasome subunit alpha type-4                   | 0 | 0.5 | #DIV/0! |
| Q9NR19 | ACSA  | HUMAN - ACSS2 Acetyl-coenzyme A synthetase, cytoplasmic         | 0 | 0.5 | #DIV/0! |
| P51570 | GALK1 | HUMAN - GALK1 Galactokinase                                     | 0 | 0.5 | #DIV/0! |
| Q8WXI9 | P66B  | HUMAN - GATAD2B Transcriptional repressor p66-beta              | 0 | 0.5 | #DIV/0! |
| P85298 | RHG08 | HUMAN - ARHGAP8 Rho GTPase-activating protein 8                 | 0 | 0.5 | #DIV/0! |
| O94992 | HEXI1 | HUMAN - HEXIM1 Protein HEXIM1                                   | 0 | 0.5 | #DIV/0! |
| P47755 | CAZA2 | HUMAN - CAPZA2 F-actin-capping protein subunit alpha-2          | 0 | 0.5 | #DIV/0! |
| Q15052 | ARHG6 | HUMAN - ARHGEF6 Rho guanine nucleotide exchange factor 6        | 0 | 0.5 | #DIV/0! |
| Q9NXG2 | THUM1 | HUMAN - THUMPD1 THUMP domain-containing protein 1               | 0 | 0.5 | #DIV/0! |
| Q13492 | PICAL | HUMAN - PICALM Phosphatidylinositol-binding clathrin assembl    | 0 | 0.5 | #DIV/0! |
| O75061 | AUXI  | HUMAN - DNAJC6 Putative tyrosine-protein phosphatase auxilin    | 0 | 0.5 | #DIV/0! |
| P21964 | COMT  | HUMAN - COMT Catechol O-methyltransferase                       | 0 | 0.5 | #DIV/0! |
| P52306 | GDS1  | HUMAN - RAP1GDS1 Rap1 GTPase-GDP dissociation stimulat          | 0 | 0.5 | #DIV/0! |
| O00231 | PSD11 | HUMAN - PSMD11 26S proteasome non-ATPase regulatory sub         | 0 | 0.5 | #DIV/0! |
| O00505 | IMA3  | HUMAN - KPNA3 Importin subunit alpha-3                          | 0 | 0.5 | #DIV/0! |
| Q9NX61 | T161A | HUMAN - TMEM161A Transmembrane protein 161A                     | 0 | 0.5 | #DIV/0! |
| Q96EK5 | KBP   | HUMAN - KIAA1279 KIF1-binding protein                           | 0 | 0.5 | #DIV/0! |
| O15131 | IMA5  | HUMAN - KPNA5 Importin subunit alpha-6                          | 0 | 0.5 | #DIV/0! |
| P52294 | IMA1  | HUMAN - KPNA1 Importin subunit alpha-1                          | 0 | 0.5 | #DIV/0! |
| O60684 | IMA7  | HUMAN - KPNA6 Importin subunit alpha-7                          | 0 | 0.5 | #DIV/0! |
| Q13325 | IFIT5 | HUMAN - IFIT5 Interferon-induced protein with tetratricopeptide | 0 | 0.5 | #DIV/0! |
| Q9UBS8 | RNF14 | HUMAN - RNF14 E3 ubiquitin-protein ligase RNF14                 | 0 | 0.5 | #DIV/0! |
| Q16181 | 7-Sep | HUMAN - SEPT7 Septin-7                                          | 0 | 0.5 | #DIV/0! |
| Q06787 | FMR1  | HUMAN - FMR1 Fragile X mental retardation protein 1             | 0 | 0.5 | #DIV/0! |
| Q9GZS1 | RPA49 | HUMAN - POLR1E DNA-directed RNA polymerase I subunit RP,        | 0 | 0.5 | #DIV/0! |
| Q9Y5T5 | UBP16 | HUMAN - USP16 Ubiquitin carboxyl-terminal hydrolase 16          | 0 | 0.5 | #DIV/0! |

|        |       |                                                                      |   |     |         |
|--------|-------|----------------------------------------------------------------------|---|-----|---------|
| Q9Y4K4 | M4K5  | HUMAN - MAP4K5 Mitogen-activated protein kinase kinase               | 0 | 0.5 | #DIV/0! |
| Q9NV88 | INT9  | HUMAN - INTS9 Integrator complex subunit 9                           | 0 | 0.5 | #DIV/0! |
| O94973 | AP2A2 | HUMAN - AP2A2 AP-2 complex subunit alpha-2                           | 0 | 0.5 | #DIV/0! |
| O75113 | N4BP1 | HUMAN - N4BP1 NEDD4-binding protein 1                                | 0 | 0.5 | #DIV/0! |
| Q9BVQ7 | SPA5L | HUMAN - SPATA5L1 Spermatogenesis-associated protein 5-like           | 0 | 0.5 | #DIV/0! |
| P35241 | RADI  | HUMAN - RDX Radixin                                                  | 0 | 0.5 | #DIV/0! |
| O00425 | IF2B3 | HUMAN - IGF2BP3 Insulin-like growth factor 2 mRNA-binding protein    | 0 | 0.5 | #DIV/0! |
| Q9HA64 | KT3K  | HUMAN - FN3KRP Ketosamine-3-kinase                                   | 0 | 0.5 | #DIV/0! |
| Q9NRZ9 | HELLS | HUMAN - HELLS Lymphoid-specific helicase                             | 0 | 0.5 | #DIV/0! |
| P36551 | HEM6  | HUMAN - CPOX Coproporphyrinogen-III oxidase, mitochondrial           | 0 | 0.5 | #DIV/0! |
| Q9NXV6 | CARF  | HUMAN - CDKN2AIP CDKN2A-interacting protein                          | 0 | 0.5 | #DIV/0! |
| Q93100 | KPBB  | HUMAN - PHKB Phosphorylase b kinase regulatory subunit beta          | 0 | 0.5 | #DIV/0! |
| O76094 | SRP72 | HUMAN - SRP72 Signal recognition particle 72 kDa protein             | 0 | 0.5 | #DIV/0! |
| Q15046 | SYK   | HUMAN - KARS Lysine--tRNA ligase                                     | 0 | 0.5 | #DIV/0! |
| P07947 | YES   | HUMAN - YES1 Tyrosine-protein kinase Yes                             | 0 | 0.5 | #DIV/0! |
| Q8IWY9 | CDAN1 | HUMAN - CDAN1 Codanin-1                                              | 0 | 0.5 | #DIV/0! |
| Q5JTZ9 | SYAM  | HUMAN - AARS2 Alanine--tRNA ligase, mitochondrial                    | 0 | 0.5 | #DIV/0! |
| O14976 | GAK   | HUMAN - GAK Cyclin-G-associated kinase                               | 0 | 0.5 | #DIV/0! |
| O94979 | SC31A | HUMAN - SEC31A Protein transport protein Sec31A                      | 0 | 0.5 | #DIV/0! |
| Q658Y4 | F91A1 | HUMAN - FAM91A1 Protein FAM91A1                                      | 0 | 0.5 | #DIV/0! |
| Q5TAP6 | UT14C | HUMAN - UTP14C U3 small nucleolar RNA-associated protein 1           | 0 | 0.5 | #DIV/0! |
| O75150 | BRE1B | HUMAN - RNF40 E3 ubiquitin-protein ligase BRE1B                      | 0 | 0.5 | #DIV/0! |
| P33991 | MCM4  | HUMAN - MCM4 DNA replication licensing factor MCM4                   | 0 | 0.5 | #DIV/0! |
| Q9H2C0 | GAN   | HUMAN - GAN Gigaxonin                                                | 0 | 0.5 | #DIV/0! |
| Q6P6C2 | ALKB5 | HUMAN - ALKBH5 Probable alpha-ketoglutarate-dependent dioxygenase    | 0 | 0.5 | #DIV/0! |
| Q96D09 | GASP2 | HUMAN - GPRASP2 G-protein coupled receptor-associated sortilin       | 0 | 0.5 | #DIV/0! |
| Q12768 | STRUM | HUMAN - KIAA0196 WASH complex subunit strumpellin                    | 0 | 0.5 | #DIV/0! |
| Q6UB35 | C1TM  | HUMAN - MTHFD1L Monofunctional C1-tetrahydrofolate synthase          | 0 | 0.5 | #DIV/0! |
| Q9Y6W3 | CAN7  | HUMAN - CAPN7 Calpain-7                                              | 0 | 0.5 | #DIV/0! |
| Q99661 | KIF2C | HUMAN - KIF2C Kinesin-like protein KIF2C                             | 0 | 0.5 | #DIV/0! |
| O75529 | TAF5L | HUMAN - TAF5L TAF5-like RNA polymerase II p300/CBP-associated factor | 0 | 0.5 | #DIV/0! |

|        |          |                                            |                                                |   |     |         |
|--------|----------|--------------------------------------------|------------------------------------------------|---|-----|---------|
| Q6IA69 | NADE     | HUMAN - NADSYN1                            | Glutamine-dependent NAD(+) synthetase          | 0 | 0.5 | #DIV/0! |
| P48553 | TPC10    | HUMAN - TRAPPC10                           | Trafficking protein particle complex subun     | 0 | 0.5 | #DIV/0! |
| P46020 | KPB1     | HUMAN - PHKA1                              | Phosphorylase b kinase regulatory subunit alp  | 0 | 0.5 | #DIV/0! |
| Q9Y3T9 | NOC2L    | HUMAN - NOC2L                              | Nucleolar complex protein 2 homolog            | 0 | 0.5 | #DIV/0! |
| Q9BU23 | LMF2     | HUMAN - LMF2                               | Lipase maturation factor 2                     | 0 | 0.5 | #DIV/0! |
| Q9UDY8 | MALT1    | HUMAN - MALT1                              | Mucosa-associated lymphoid tissue lymphomæ     | 0 | 0.5 | #DIV/0! |
| O00116 | ADAS     | HUMAN - AGPS                               | Alkyldihydroxyacetonephosphate synthase, per   | 0 | 0.5 | #DIV/0! |
| Q68E01 | INT3     | HUMAN - INTS3                              | Integrator complex subunit 3                   | 0 | 0.5 | #DIV/0! |
| Q8WTT2 | NOC3L    | HUMAN - NOC3L                              | Nucleolar complex protein 3 homolog            | 0 | 0.5 | #DIV/0! |
| Q9Y2H6 | FND3A    | HUMAN - FNDC3A                             | Fibronectin type-III domain-containing proteii | 0 | 0.5 | #DIV/0! |
| Q6UWE0 | LRS - LF | HUMAN - E3 ubiquitin-protein ligase LRSAM1 |                                                | 0 | 0.5 | #DIV/0! |
| Q9UG01 | IF172    | HUMAN - IFT172                             | Intraflagellar transport protein 172 homolog   | 0 | 0.5 | #DIV/0! |
| P14923 | PLAK     | HUMAN - JUP                                | Junction plakoglobin                           | 0 | 0.5 | #DIV/0! |
| Q9UIG0 | BAZ1B    | HUMAN - BAZ1B                              | Tyrosine-protein kinase BAZ1B                  | 0 | 0.5 | #DIV/0! |
| P30876 | RPB2     | HUMAN - POLR2B                             | DNA-directed RNA polymerase II subunit RF      | 0 | 0.5 | #DIV/0! |
| Q6AI08 | HEAT6    | HUMAN - HEATR6                             | HEAT repeat-containing protein 6               | 0 | 0.5 | #DIV/0! |
| O00139 | KIF2A    | HUMAN - KIF2A                              | Kinesin-like protein KIF2A                     | 0 | 0.5 | #DIV/0! |
| E9PPU0 | E9PPU0   | HUMA - EPPK1                               | Epiplakin                                      | 0 | 0.5 | #DIV/0! |
| Q13395 | TARB1    | HUMAN - TARBP1                             | Probable methyltransferase TARBP1              | 0 | 0.5 | #DIV/0! |
| P48634 | PRC2A    | HUMAN - PRRC2A                             | Protein PRRC2A                                 | 0 | 0.5 | #DIV/0! |
| Q99590 | SCA - S  | HUMAN - Protein SCAF11                     |                                                | 0 | 0.5 | #DIV/0! |
| Q10570 | CPSF1    | HUMAN - CPSF1                              | Cleavage and polyadenylation specificity facto | 0 | 0.5 | #DIV/0! |
| O95071 | UBR5     | HUMAN - UBR5                               | E3 ubiquitin-protein ligase UBR5               | 0 | 0.5 | #DIV/0! |
| Q7Z4S6 | KI21A    | HUMAN - KIF21A                             | Kinesin-like protein KIF21A                    | 0 | 0.5 | #DIV/0! |
| O00159 | MYO1C    | HUMAN - MYO1C                              | Unconventional myosin-1c                       | 0 | 0.5 | #DIV/0! |
| O15020 | SPTN2    | HUMAN - SPTBN2                             | Spectrin beta chain, non-erythrocytic 2        | 0 | 0.5 | #DIV/0! |
| Q9Y3P9 | RBGP1    | HUMAN - RABGAP1                            | Rab GTPase-activating protein 1                | 0 | 0.5 | #DIV/0! |
| O15015 | ZN6 - ZN | HUMAN - Zinc finger protein 646            |                                                | 0 | 0.5 | #DIV/0! |
| Q8NFP9 | NBEA     | HUMAN - NBEA                               | Neurobeachin                                   | 0 | 0.5 | #DIV/0! |
| Q8NF50 | DOCK8    | HUMAN - DOCK8                              | Dedicator of cytokinesis protein 8             | 0 | 0.5 | #DIV/0! |
| Q7KZ85 | SPT6H    | HUMAN - SUPT6H                             | Transcription elongation factor SPT6           | 0 | 0.5 | #DIV/0! |

|        |           |                                                                    |   |     |         |
|--------|-----------|--------------------------------------------------------------------|---|-----|---------|
| Q8IY37 | DHX37     | HUMAN - DHX37 Probable ATP-dependent RNA helicase DHX3             | 0 | 0.5 | #DIV/0! |
| P32019 | I5P2      | HUMAN - INPP5B Type II inositol 1,4,5-trisphosphate 5-phosphatase  | 0 | 0.5 | #DIV/0! |
| P21359 | NF1       | HUMAN - NF1 Neurofibromin                                          | 0 | 0.5 | #DIV/0! |
| Q6ZS30 | NBEL1     | HUMAN - NBEAL1 Neurobeachin-like protein 1                         | 0 | 0.5 | #DIV/0! |
| O75165 | DJC13     | HUMAN - DNAJC13 DnaJ homolog subfamily C member 13                 | 0 | 0.5 | #DIV/0! |
| Q9H4A3 | WNK1      | HUMAN - WNK1 Serine/threonine-protein kinase WNK1                  | 0 | 0.5 | #DIV/0! |
| Q8NI27 | THOC2     | HUMAN - THOC2 THO complex subunit 2                                | 0 | 0.5 | #DIV/0! |
| Q8NCM8 | DYHC2     | HUMAN - DYNC2H1 Cytoplasmic dynein 2 heavy chain 1                 | 0 | 0.5 | #DIV/0! |
| B5ME49 | B5ME49    | HUMA - MUC16 Mucin-16                                              | 0 | 0.5 | #DIV/0! |
| P28161 | GSTM2     | HUMAN - GSTM2 Glutathione S-transferase Mu 2                       | 0 | 0.5 | #DIV/0! |
| P15927 | RFA2      | HUMAN - RPA2 Replication protein A 32 kDa subunit                  | 0 | 0.5 | #DIV/0! |
| P48739 | PIPNB     | HUMAN - PITPNB Phosphatidylinositol transfer protein beta isoform  | 0 | 0.5 | #DIV/0! |
| Q09028 | RBBP4     | HUMAN - RBBP4 Histone-binding protein RBBP4                        | 0 | 0.5 | #DIV/0! |
| Q9UKB1 | FBW1B     | HUMAN - FBXW11 F-box/WD repeat-containing protein 11               | 0 | 0.5 | #DIV/0! |
| P26927 | HGFL      | HUMAN - MST1 Hepatocyte growth factor-like protein                 | 0 | 0.5 | #DIV/0! |
| O94810 | RGS11     | HUMAN - RGS11 Regulator of G-protein signaling 11                  | 0 | 0.5 | #DIV/0! |
| Q02246 | CNTN2     | HUMAN - CNTN2 Contactin-2                                          | 0 | 0.5 | #DIV/0! |
| P33121 | ACSL1     | HUMAN - ACSL1 Long-chain-fatty-acid--CoA ligase 1                  | 0 | 0.5 | #DIV/0! |
| Q14247 | SRC8      | HUMAN - CTTN Src substrate cortactin                               | 0 | 0.5 | #DIV/0! |
| O75828 | CBR3      | HUMAN - CBR3 Carbonyl reductase                                    | 0 | 0.5 | #DIV/0! |
| P16152 | CBR1      | HUMAN - CBR1 Carbonyl reductase                                    | 0 | 0.5 | #DIV/0! |
| Q13769 | THOC5     | HUMAN - THOC5 THO complex subunit 5 homolog                        | 0 | 0.5 | #DIV/0! |
| Q14738 | 2A5D      | HUMAN - PPP2R5D Serine/threonine-protein phosphatase 2A 5          | 0 | 0.5 | #DIV/0! |
| Q12906 | ILF3      | HUMAN - ILF3 Interleukin enhancer-binding factor 3                 | 0 | 0.5 | #DIV/0! |
| P13667 | PDIA4     | HUMAN - PDIA4 Protein disulfide-isomerase A4                       | 0 | 0.5 | #DIV/0! |
| Q14141 | 6-Sep     | HUMAN - SEPT6 Septin-6                                             | 0 | 0.5 | #DIV/0! |
| Q9NVA2 | 11-Sep    | HUMAN - SEPT11 Septin-11                                           | 0 | 0.5 | #DIV/0! |
| Q9ULI4 | KI2 - KIF | HUMAN -Kinesin-like protein KIF26A                                 | 0 | 0.5 | #DIV/0! |
| Q92558 | WASF1     | HUMAN - WASF1 Wiskott-Aldrich syndrome protein family member 1     | 0 | 0.5 | #DIV/0! |
| Q5VTR2 | BRE1A     | HUMAN - RNF20 E3 ubiquitin-protein ligase BRE1A                    | 0 | 0.5 | #DIV/0! |
| P54646 | AAPK2     | HUMAN - PRKAA2 5'-AMP-activated protein kinase catalytic subunit 2 | 0 | 0.5 | #DIV/0! |



|        |           |                                                               |           |        |         |
|--------|-----------|---------------------------------------------------------------|-----------|--------|---------|
| Q9Y617 | SERC      | HUMAN - PSAT1 Phosphoserine aminotransferase                  | 0         | 0.5    | #DIV/0! |
| Q9H9Y6 | RPA2      | HUMAN - POLR1B DNA-directed RNA polymerase I subunit RP,      | 0         | 0.5    | #DIV/0! |
| Q05682 | CALD1     | HUMAN - CALD1 Caldesmon                                       | 0         | 0.5    | #DIV/0! |
| O14727 | APAF      | HUMAN - APAF1 Apoptotic protease-activating factor 1          | 0         | 0.5    | #DIV/0! |
| P35606 | COPB2     | HUMAN - COPB2 Coatomer subunit beta'                          | 0         | 0.5    | #DIV/0! |
| Q9HCM1 | K1551     | HUMAN - KIAA1551 Uncharacterized protein KIAA1551             | 0         | 0.5    | #DIV/0! |
| Q9NQC3 | RTN4      | HUMAN - RTN4 Reticulon-4                                      | 0         | 0.5    | #DIV/0! |
| Q8N3P4 | VPS8      | HUMAN - VPS8 Vacuolar protein sorting-associated protein 8 hc | 0         | 0.5    | #DIV/0! |
| P42167 | LAP2B     | HUMAN - TMPO Lamina-associated polypeptide 2, isoforms bet    | 0         | 0.5    | #DIV/0! |
| Q13107 | UBP4      | HUMAN - USP4 Ubiquitin carboxyl-terminal hydrolase 4          | 0         | 0.5    | #DIV/0! |
| Q9Y2J2 | E41L3     | HUMAN - EPB41L3 Band 4.1-like protein 3                       | 0         | 0.5    | #DIV/0! |
| Q92817 | EVP - E\  | HUMAN - Envoplakin                                            | 0         | 0.5    | #DIV/0! |
| Q9UKN7 | MYO - M   | HUMAN - Unconventional myosin-XV                              | 0         | 0.5    | #DIV/0! |
| Q6KC79 | NIPBL     | HUMAN - NIPBL Nipped-B-like protein                           | 0         | 0.5    | #DIV/0! |
| Q03001 | DYS - D\  | HUMAN - Dystonin                                              | 0         | 0.5    | #DIV/0! |
| Q5CZC0 | FSI - FSI | HUMAN - Fibrous sheath-interacting protein 2                  | 0         | 0.5    | #DIV/0! |
| P07814 | SYEP      | HUMAN - EPRS Bifunctional glutamate/proline--tRNA ligase      | 1         | 68.5   | 68.5    |
| O15067 | PUR4      | HUMAN - PFAS Phosphoribosylformylglycinamide synthase         | 0.6666667 | 34.5   | 51.75   |
| P49321 | NASP      | HUMAN - NASP Nuclear autoantigenic sperm protein              | 0.6666667 | 33     | 49.5    |
| P68036 | UB2L3     | HUMAN - UBE2L3 Ubiquitin-conjugating enzyme E2 L3             | 0.6666667 | 32.75  | 49.125  |
| P41250 | SYG       | HUMAN - GARS Glycine--tRNA ligase                             | 0.6666667 | 32     | 48      |
| Q99873 | ANM1      | HUMAN - PRMT1 Protein arginine N-methyltransferase 1          | 0.6666667 | 25     | 37.5    |
| Q16658 | FSCN1     | HUMAN - FSCN1 Fascin                                          | 0.6666667 | 25     | 37.5    |
| P61978 | HNRPK     | HUMAN - HNRNPK Heterogeneous nuclear ribonucleoprotein K      | 1         | 36.75  | 36.75   |
| O14980 | XPO1      | HUMAN - XPO1 Exportin-1                                       | 1         | 36.5   | 36.5    |
| Q15181 | IPYR      | HUMAN - PPA1 Inorganic pyrophosphatase                        | 1         | 31     | 31      |
| P22234 | PUR6      | HUMAN - PAICS Multifunctional protein ADE2                    | 0.6666667 | 20.25  | 30.375  |
| P48147 | PPCE      | HUMAN - PREP Prolyl endopeptidase                             | 0.6666667 | 20.25  | 30.375  |
| P55060 | XPO2      | HUMAN - CSE1L Exportin-2                                      | 0.6666667 | 18     | 27      |
| P13639 | EF2       | HUMAN - EEF2 Elongation factor 2                              | 8.3333333 | 201.25 | 24.15   |
| P22061 | PIMT      | HUMAN - PCMT1 Protein-L-isoaspartate(D-aspartate) O-methylt   | 2.3333333 | 54.25  | 23.25   |

|        |       |                                                               |           |        |          |
|--------|-------|---------------------------------------------------------------|-----------|--------|----------|
| P06748 | NPM   | HUMAN - NPM1 Nucleophosmin                                    | 1         | 23     | 23       |
| P12268 | IMDH2 | HUMAN - IMPDH2 Inosine-5'-monophosphate dehydrogenase 2       | 0.6666667 | 13.75  | 20.625   |
| P13797 | PLST  | HUMAN - PLS3 Plastin-3                                        | 1.3333333 | 27.5   | 20.625   |
| Q00610 | CLH1  | HUMAN - CLTC Clathrin heavy chain 1                           | 1.6666667 | 33.5   | 20.1     |
| P78527 | PRKDC | HUMAN - PRKDC DNA-dependent protein kinase catalytic subu     | 2.3333333 | 46.75  | 20.03571 |
| P27348 | 1433T | HUMAN - YWHAQ 14-3-3 protein theta                            | 0.6666667 | 13.25  | 19.875   |
| P53396 | ACLY  | HUMAN - ACLY ATP-citrate synthase                             | 2         | 39.5   | 19.75    |
| P26641 | EF1G  | HUMAN - EEF1G Elongation factor 1-gamma                       | 3         | 58.25  | 19.41667 |
| Q9P258 | RCC2  | HUMAN - RCC2 Protein RCC2                                     | 1.3333333 | 25.25  | 18.9375  |
| P22102 | PUR2  | HUMAN - GART Trifunctional purine biosynthetic protein adenos | 5         | 78.75  | 15.75    |
| Q99829 | CPNE1 | HUMAN - CPNE1 Copine-1                                        | 0.6666667 | 10.5   | 15.75    |
| P78371 | TCPB  | HUMAN - CCT2 T-complex protein 1 subunit beta                 | 4.3333333 | 66.5   | 15.34615 |
| P49327 | FAS   | HUMAN - FASN Fatty acid synthase                              | 11        | 165.25 | 15.02273 |
| P23526 | SAHH  | HUMAN - AHCY Adenosylhomocysteinase                           | 1.3333333 | 20     | 15       |
| Q14204 | DYHC1 | HUMAN - DYNC1H1 Cytoplasmic dynein 1 heavy chain 1            | 1.3333333 | 19.5   | 14.625   |
| P26599 | PTBP1 | HUMAN - PTBP1 Polypyrimidine tract-binding protein 1          | 1.6666667 | 24     | 14.4     |
| P26639 | SYTC  | HUMAN - TARS Threonine--tRNA ligase, cytoplasmic              | 1         | 13.25  | 13.25    |
| P08238 | HS90B | HUMAN - HSP90AB1 Heat shock protein HSP 90-beta               | 10.666667 | 137.25 | 12.86719 |
| O00571 | DDX3X | HUMAN - DDX3X ATP-dependent RNA helicase DDX3X                | 1         | 12.75  | 12.75    |
| P17987 | TCPA  | HUMAN - TCP1 T-complex protein 1 subunit alpha                | 2.6666667 | 33.75  | 12.65625 |
| O00410 | IPO5  | HUMAN - IPO5 Importin-5                                       | 1.6666667 | 21     | 12.6     |
| Q8IYD1 | ERF3B | HUMAN - GSPT2 Eukaryotic peptide chain release factor GTP-b   | 1         | 12.5   | 12.5     |
| P23528 | COF1  | HUMAN - CFL1 Cofilin-1                                        | 4.6666667 | 56.75  | 12.16071 |
| Q5TFE4 | NT5D1 | HUMAN - NT5DC1 5'-nucleotidase domain-containing protein 1    | 0.6666667 | 8      | 12       |
| P40227 | TCPZ  | HUMAN - CCT6A T-complex protein 1 subunit zeta                | 1         | 11     | 11       |
| P32119 | PRDX2 | HUMAN - PRDX2 Peroxiredoxin-2                                 | 2.3333333 | 24.25  | 10.39286 |
| O43175 | SERA  | HUMAN - PHGDH D-3-phosphoglycerate dehydrogenase              | 1.3333333 | 13.75  | 10.3125  |
| P53992 | SC24C | HUMAN - SEC24C Protein transport protein Sec24C               | 0.6666667 | 6.5    | 9.75     |
| P51991 | ROA3  | HUMAN - HNRNPA3 Heterogeneous nuclear ribonucleoprotein /     | 1         | 9.25   | 9.25     |
| Q92616 | GCN1L | HUMAN - GCN1L1 Translational activator GCN1                   | 2.3333333 | 21.5   | 9.214286 |
| Q06830 | PRDX1 | HUMAN - PRDX1 Peroxiredoxin-1                                 | 2.6666667 | 24.5   | 9.1875   |

|        |       |                                                                    |           |       |          |
|--------|-------|--------------------------------------------------------------------|-----------|-------|----------|
| P22314 | UBA1  | HUMAN - UBA1 Ubiquitin-like modifier-activating enzyme 1           | 6.6666667 | 57.25 | 8.5875   |
| P14618 | KPYM  | HUMAN - PKM Pyruvate kinase isozymes M1/M2                         | 6.3333333 | 53.5  | 8.447368 |
| Q02543 | RL18A | HUMAN - RPL18A 60S ribosomal protein L18a                          | 2         | 16.25 | 8.125    |
| Q92499 | DDX1  | HUMAN - DDX1 ATP-dependent RNA helicase DDX1                       | 1.3333333 | 10.75 | 8.0625   |
| Q9P2J5 | SYLC  | HUMAN - LARS Leucine--tRNA ligase, cytoplasmic                     | 1         | 8     | 8        |
| O00178 | GTPB1 | HUMAN - GTPBP1 GTP-binding protein 1                               | 0.6666667 | 5.25  | 7.875    |
| P09936 | UCHL1 | HUMAN - UCHL1 Ubiquitin carboxyl-terminal hydrolase isozyme        | 0.6666667 | 4.75  | 7.125    |
| P00492 | HPRT  | HUMAN - HPRT1 Hypoxanthine-guanine phosphoribosyltransfer          | 1         | 7     | 7        |
| P52597 | HNRPF | HUMAN - HNRNPF Heterogeneous nuclear ribonucleoprotein F           | 1.6666667 | 11.5  | 6.9      |
| P07900 | HS90A | HUMAN - HSP90AA1 Heat shock protein HSP 90-alpha                   | 20.666667 | 140.5 | 6.798387 |
| P30041 | PRDX6 | HUMAN - PRDX6 Peroxiredoxin-6                                      | 6         | 38    | 6.333333 |
| P47897 | SYQ   | HUMAN - QARS Glutamine--tRNA ligase                                | 1.6666667 | 10.5  | 6.3      |
| P06744 | G6PI  | HUMAN - GPI Glucose-6-phosphate isomerase                          | 1.3333333 | 8     | 6        |
| P60891 | PRPS1 | HUMAN - PRPS1 Ribose-phosphate pyrophosphokinase 1                 | 1         | 6     | 6        |
| O75369 | FLNB  | HUMAN - FLNB Filamin-B                                             | 1.6666667 | 9.75  | 5.85     |
| P21333 | FLNA  | HUMAN - FLNA Filamin-A                                             | 1.6666667 | 9.75  | 5.85     |
| P31150 | GDIA  | HUMAN - GDI1 Rab GDP dissociation inhibitor alpha                  | 0.6666667 | 3.75  | 5.625    |
| P55209 | NP1L1 | HUMAN - NAP1L1 Nucleosome assembly protein 1-like 1                | 0.6666667 | 3.75  | 5.625    |
| P62910 | RL32  | HUMAN - RPL32 60S ribosomal protein L32                            | 1         | 5.25  | 5.25     |
| P09429 | HMGB1 | HUMAN - HMGB1 High mobility group protein B1                       | 0.6666667 | 3.5   | 5.25     |
| P11802 | CDK4  | HUMAN - CDK4 Cyclin-dependent kinase 4                             | 0.6666667 | 3.5   | 5.25     |
| Q01518 | CAP1  | HUMAN - CAP1 Adenylyl cyclase-associated protein 1                 | 0.6666667 | 3.5   | 5.25     |
| P14866 | HNRPL | HUMAN - HNRNPL Heterogeneous nuclear ribonucleoprotein L           | 5         | 25.5  | 5.1      |
| Q05639 | EF1A2 | HUMAN - EEF1A2 Elongation factor 1-alpha 2                         | 12.333333 | 60.5  | 4.905405 |
| P12956 | XRCC6 | HUMAN - XRCC6 X-ray repair cross-complementing protein 6           | 2.6666667 | 13    | 4.875    |
| P11413 | G6PD  | HUMAN - G6PD Glucose-6-phosphate 1-dehydrogenase                   | 0.6666667 | 3.25  | 4.875    |
| P25787 | PSA2  | HUMAN - PSMA2 Proteasome subunit alpha type-2                      | 1         | 4.75  | 4.75     |
| P13010 | XRCC5 | HUMAN - XRCC5 X-ray repair cross-complementing protein 5           | 6.3333333 | 29.5  | 4.657895 |
| Q6IS14 | IF5AL | HUMAN - EIF5AL1 Eukaryotic translation initiation factor 5A-1-like | 5.6666667 | 25.75 | 4.544118 |
| Q15185 | TEBP  | HUMAN - PTGES3 Prostaglandin E synthase 3                          | 1.3333333 | 6     | 4.5      |
| P50991 | TCPD  | HUMAN - CCT4 T-complex protein 1 subunit delta                     | 1         | 4.5   | 4.5      |

|        |        |                                                                 |            |       |          |
|--------|--------|-----------------------------------------------------------------|------------|-------|----------|
| P30085 | KCY    | HUMAN - CMPK1 UMP-CMP kinase                                    | 1          | 4.5   | 4.5      |
| Q9NVS9 | PNPO   | HUMAN - PNPO Pyridoxine-5'-phosphate oxidase                    | 0.6666667  | 3     | 4.5      |
| P46783 | RS10   | HUMAN - RPS10 40S ribosomal protein S10                         | 1          | 4.5   | 4.5      |
| P36578 | RL4    | HUMAN - RPL4 60S ribosomal protein L4                           | 0.6666667  | 3     | 4.5      |
| P68104 | EF1A1  | HUMAN - EEF1A1 Elongation factor 1-alpha 1                      | 18.3333333 | 79.75 | 4.35     |
| P27708 | PYR1   | HUMAN - CAD CAD protein                                         | 2.6666667  | 11.5  | 4.3125   |
| A2RTX5 | SYTC2  | HUMAN - TARSL2 Probable threonine--tRNA ligase 2, cytoplasmic   | 1          | 4.25  | 4.25     |
| O95433 | AHSA1  | HUMAN - AHSA1 Activator of 90 kDa heat shock protein ATPase     | 1          | 4.25  | 4.25     |
| P62899 | RL31   | HUMAN - RPL31 60S ribosomal protein L31                         | 0.6666667  | 2.75  | 4.125    |
| P23246 | SFPQ   | HUMAN - SFPQ Splicing factor, proline- and glutamine-rich       | 0.6666667  | 2.75  | 4.125    |
| P12814 | ACTN1  | HUMAN - ACTN1 Alpha-actinin-1                                   | 1.3333333  | 5.25  | 3.9375   |
| P60842 | IF4A1  | HUMAN - EIF4A1 Eukaryotic initiation factor 4A-I                | 2          | 7.5   | 3.75     |
| P63010 | AP2B1  | HUMAN - AP2B1 AP-2 complex subunit beta                         | 0.6666667  | 2.5   | 3.75     |
| Q15393 | SF3B3  | HUMAN - SF3B3 Splicing factor 3B subunit 3                      | 0.6666667  | 2.5   | 3.75     |
| P62258 | 1433E  | HUMAN - YWHAE 14-3-3 protein epsilon                            | 4          | 14.75 | 3.6875   |
| P11142 | HSP7C  | HUMAN - HSPA8 Heat shock cognate 71 kDa protein                 | 3          | 11    | 3.666667 |
| P49368 | TCPG   | HUMAN - CCT3 T-complex protein 1 subunit gamma                  | 1.6666667  | 6     | 3.6      |
| P09211 | GSTP1  | HUMAN - GSTP1 Glutathione S-transferase P                       | 1.6666667  | 6     | 3.6      |
| P04075 | ALDOA  | HUMAN - ALDOA Fructose-bisphosphate aldolase A                  | 3          | 10    | 3.333333 |
| P29401 | TKT    | HUMAN - TKT Transketolase                                       | 1          | 3.25  | 3.25     |
| Q16630 | CPSF6  | HUMAN - CPSF6 Cleavage and polyadenylation specificity factor 6 | 1          | 3.25  | 3.25     |
| P00558 | PGK1   | HUMAN - PGK1 Phosphoglycerate kinase 1                          | 1.6666667  | 5.25  | 3.15     |
| P30086 | PEBP1  | HUMAN - PEBP1 Phosphatidylethanolamine-binding protein 1        | 2.3333333  | 7.25  | 3.107143 |
| P27635 | RL10   | HUMAN - RPL10 60S ribosomal protein L10                         | 4.6666667  | 14    | 3        |
| P62701 | RS4X   | HUMAN - RPS4X 40S ribosomal protein S4, X isoform               | 1.3333333  | 4     | 3        |
| P10809 | CH60   | HUMAN - HSPD1 60 kDa heat shock protein, mitochondrial          | 1          | 3     | 3        |
| P14625 | ENPL   | HUMAN - HSP90B1 Endoplasmic reticulum protein                   | 0.6666667  | 2     | 3        |
| Q14697 | GANAB  | HUMAN - GANAB Neutral alpha-glucosidase AB                      | 2.6666667  | 7.5   | 2.8125   |
| E7EMT2 | E7EMT2 | HUMAN - Uncharacterized protein                                 | 3          | 8.25  | 2.75     |
| P48643 | TCPE   | HUMAN - CCT5 T-complex protein 1 subunit epsilon                | 6          | 16    | 2.666667 |
| P00338 | LDHA   | HUMAN - LDHA L-lactate dehydrogenase A chain                    | 2          | 5.25  | 2.625    |

|        |          |                                                                 |            |       |          |
|--------|----------|-----------------------------------------------------------------|------------|-------|----------|
| O43707 | ACTN4    | HUMAN - ACTN4 Alpha-actinin-4                                   | 0.6666667  | 1.75  | 2.625    |
| O00151 | PDL1     | HUMAN - PDLIM1 PDZ and LIM domain protein 1                     | 0.6666667  | 1.75  | 2.625    |
| P04406 | G3P      | HUMAN - GAPDH Glyceraldehyde-3-phosphate dehydrogenase          | 30.666667  | 77.25 | 2.519022 |
| P25205 | MCM3     | HUMAN - MCM3 DNA replication licensing factor MCM3              | 4          | 10    | 2.5      |
| P61981 | 1433G    | HUMAN - YWHAG 14-3-3 protein gamma                              | 1          | 2.5   | 2.5      |
| Q9H2U2 | IPYR2    | HUMAN - PPA2 Inorganic pyrophosphatase 2, mitochondrial         | 1          | 2.5   | 2.5      |
| O75533 | SF3B1    | HUMAN - SF3B1 Splicing factor 3B subunit 1                      | 1          | 2.5   | 2.5      |
| P15531 | NDKA     | HUMAN - NME1 Nucleoside diphosphate kinase A                    | 7.3333333  | 18.25 | 2.488636 |
| P05455 | LA       | HUMAN - SSB Lupus La protein                                    | 3          | 7.25  | 2.416667 |
| P63104 | 1433Z    | HUMAN - YWHAZ 14-3-3 protein zeta/delta                         | 3.3333333  | 7.5   | 2.25     |
| P02538 | K2C6A    | HUMAN - KRT6A Keratin, type II cytoskeletal 6A                  | 1          | 2.25  | 2.25     |
| Q13526 | PIN1     | HUMAN - PIN1 Peptidyl-prolyl cis-trans isomerase NIMA-interacti | 0.6666667  | 1.5   | 2.25     |
| Q14103 | HNRPD    | HUMAN - HNRNPD Heterogeneous nuclear ribonucleoprotein D        | 0.6666667  | 1.5   | 2.25     |
| P18621 | RL17     | HUMAN - RPL17 60S ribosomal protein L17                         | 1.3333333  | 3     | 2.25     |
| J3QL51 | J3QL51   | HUMAN - RPL17-C18ORF32 Protein RPL17-C18ORF32                   | 1.3333333  | 3     | 2.25     |
| Q15084 | PDIA6    | HUMAN - PDIA6 Protein disulfide-isomerase A6                    | 0.6666667  | 1.5   | 2.25     |
| P16401 | H15 - HI | HUMAN- Histone H1.5                                             | 0.6666667  | 1.5   | 2.25     |
| P18669 | PGAM1    | HUMAN - PGAM1 Phosphoglycerate mutase 1                         | 8          | 17.5  | 2.1875   |
| P62841 | RS15     | HUMAN - RPS15 40S ribosomal protein S15                         | 1.6666667  | 3.5   | 2.1      |
| Q12905 | ILF2     | HUMAN - ILF2 Interleukin enhancer-binding factor 2              | 1.6666667  | 3.5   | 2.1      |
| P32969 | RL9      | HUMAN - RPL9P9 60S ribosomal protein L9                         | 2.6666667  | 5.5   | 2.0625   |
| P62937 | PPIA     | HUMAN - PPIA Peptidyl-prolyl cis-trans isomerase A              | 7.6666667  | 15.5  | 2.021739 |
| P62829 | RL23     | HUMAN - RPL23 60S ribosomal protein L23                         | 1          | 2     | 2        |
| P22626 | ROA2     | HUMAN - HNRNPA2B1 Heterogeneous nuclear ribonucleoprote         | 1          | 2     | 2        |
| O00154 | BACH     | HUMAN - ACOT7 Cytosolic acyl coenzyme A thioester hydrolase     | 1          | 2     | 2        |
| P07437 | TBB5     | HUMAN - TUBB Tubulin beta chain                                 | 14.3333333 | 28.5  | 1.988372 |
| P19338 | NUCL     | HUMAN - NCL Nucleolin                                           | 11.3333333 | 22.5  | 1.985294 |
| P68371 | TBB4B    | HUMAN - TUBB4B Tubulin beta-4B chain                            | 12.666667  | 24.75 | 1.953947 |
| Q9ULC4 | MCTS1    | HUMAN - MCTS1 Malignant T-cell-amplified sequence 1             | 1.6666667  | 3.25  | 1.95     |
| P46782 | RS5      | HUMAN - RPS5 40S ribosomal protein S5                           | 1.6666667  | 3.25  | 1.95     |
| P20290 | BTF3     | HUMAN - BTF3 Transcription factor BTF3                          | 1.6666667  | 3.25  | 1.95     |

|        |        |                                                                        |            |       |          |
|--------|--------|------------------------------------------------------------------------|------------|-------|----------|
| Q02790 | FKBP4  | HUMAN - FKBP4 Peptidyl-prolyl cis-trans isomerase FKBP4                | 1.6666667  | 3.25  | 1.95     |
| P40429 | RL13A  | HUMAN - RPL13A 60S ribosomal protein L13a                              | 5.6666667  | 10.75 | 1.897059 |
| O43598 | RCL    | HUMAN - RCL Deoxyribonucleoside 5'-monophosphate N-glycosyltransferase | 1.3333333  | 2.5   | 1.875    |
| P08107 | HSP71  | HUMAN - HSPA1B Heat shock 70 kDa protein 1A/1B                         | 53         | 94.75 | 1.787736 |
| P12277 | KCRB   | HUMAN - CKB Creatine kinase B-type                                     | 50.3333333 | 89    | 1.768212 |
| P0CG48 | UBC    | HUMAN - UBC Polyubiquitin-C                                            | 2          | 3.5   | 1.75     |
| P62987 | RL40   | HUMAN - UBA52 Ubiquitin-60S ribosomal protein L40                      | 2          | 3.5   | 1.75     |
| P62979 | RS27A  | HUMAN - RPS27A Ubiquitin-40S ribosomal protein S27a                    | 2          | 3.5   | 1.75     |
| P15259 | PGAM2  | HUMAN - PGAM2 Phosphoglycerate mutase 2                                | 2.6666667  | 4.5   | 1.6875   |
| P50395 | GDIB   | HUMAN - GDI2 Rab GDP dissociation inhibitor beta                       | 2.6666667  | 4.5   | 1.6875   |
| P62314 | SMD1   | HUMAN - SNRPD1 Small nuclear ribonucleoprotein Sm D1                   | 3.3333333  | 5.5   | 1.65     |
| O15042 | SR140  | HUMAN - U2SURP U2 snRNP-associated SURP motif-containing protein       | 3          | 4.5   | 1.5      |
| P62861 | RS30   | HUMAN - FAU 40S ribosomal protein S30                                  | 0.6666667  | 1     | 1.5      |
| P07237 | PDIA1  | HUMAN - P4HB Protein disulfide-isomerase                               | 1          | 1.5   | 1.5      |
| P68366 | TBA4A  | HUMAN - TUBA4A Tubulin alpha-4A chain                                  | 44.6666667 | 65.25 | 1.460821 |
| P18124 | RL7    | HUMAN - RPL7 60S ribosomal protein L7                                  | 3.6666667  | 5     | 1.363636 |
| P60709 | ACTB   | HUMAN - ACTB Actin, cytoplasmic 1                                      | 32.3333333 | 43.75 | 1.353093 |
| P09651 | ROA1   | HUMAN - HNRNPA1 Heterogeneous nuclear ribonucleoprotein A1             | 4.6666667  | 6.25  | 1.339286 |
| P48637 | GSHB   | HUMAN - GSS Glutathione synthetase                                     | 2.6666667  | 3.5   | 1.3125   |
| P08779 | K1C16  | HUMAN - KRT16 Keratin, type I cytoskeletal 16                          | 1.3333333  | 1.75  | 1.3125   |
| P00918 | CAH2   | HUMAN - CA2 Carbonic anhydrase 2                                       | 16.3333333 | 20.75 | 1.270408 |
| P15880 | RS2    | HUMAN - RPS2 40S ribosomal protein S2                                  | 8.6666667  | 11    | 1.269231 |
| P62136 | PP1A   | HUMAN - PPP1CA Serine/threonine-protein phosphatase PP1-alpha          | 2          | 2.5   | 1.25     |
| J3QRK5 | J3QRK5 | HUMAN - UBBP4 Protein UBBP4                                            | 2          | 2.5   | 1.25     |
| P46779 | RL28   | HUMAN - RPL28 60S ribosomal protein L28                                | 1          | 1.25  | 1.25     |
| P23284 | PPIB   | HUMAN - PPIB Peptidyl-prolyl cis-trans isomerase B                     | 2          | 2.5   | 1.25     |
| O75223 | GGCT   | HUMAN - GGCT Gamma-glutamylcyclotransferase                            | 1.6666667  | 2     | 1.2      |
| P63279 | UBC9   | HUMAN - UBE2I SUMO-conjugating enzyme UBC9                             | 3.3333333  | 4     | 1.2      |
| J3QS99 | J3QS99 | HUMAN - Uncharacterized protein                                        | 2.3333333  | 2.75  | 1.178571 |
| P62263 | RS14   | HUMAN - RPS14 40S ribosomal protein S14                                | 0.6666667  | 0.75  | 1.125    |
| Q9NRX4 | PHP14  | HUMAN - PHPT1 14 kDa phosphohistidine phosphatase                      | 1.3333333  | 1.5   | 1.125    |

|        |       |                                                                 |           |       |          |
|--------|-------|-----------------------------------------------------------------|-----------|-------|----------|
| P40925 | MDHC  | HUMAN - MDH1 Malate dehydrogenase, cytoplasmic                  | 2         | 2.25  | 1.125    |
| P62269 | RS18  | HUMAN - RPS18 40S ribosomal protein S18                         | 6.3333333 | 7     | 1.105263 |
| P63173 | RL38  | HUMAN - RPL38 60S ribosomal protein L38                         | 8         | 8.75  | 1.09375  |
| P84085 | ARF5  | HUMAN - ARF5 ADP-ribosylation factor 5                          | 2.3333333 | 2.5   | 1.071429 |
| P08758 | ANXA5 | HUMAN - ANXA5 Annexin A5                                        | 1.6666667 | 1.75  | 1.05     |
| P11498 | PYC   | HUMAN - PC Pyruvate carboxylase, mitochondrial                  | 43        | 45    | 1.046512 |
| P06733 | ENOA  | HUMAN - ENO1 Alpha-enolase                                      | 24.666667 | 25.75 | 1.043919 |
| Q07020 | RL18  | HUMAN - RPL18 60S ribosomal protein L18                         | 2.6666667 | 2.75  | 1.03125  |
| P13645 | K1C10 | HUMAN - KRT10 Keratin, type I cytoskeletal 10                   | 28.666667 | 29.5  | 1.02907  |
| P62081 | RS7   | HUMAN - RPS7 40S ribosomal protein S7                           | 11.666667 | 12    | 1.028571 |
| P07195 | LDHB  | HUMAN - LDHB L-lactate dehydrogenase B chain                    | 10        | 10.25 | 1.025    |
| P62266 | RS23  | HUMAN - RPS23 40S ribosomal protein S23                         | 6.6666667 | 6.75  | 1.0125   |
| P30044 | PRDX5 | HUMAN - PRDX5 Peroxiredoxin-5, mitochondrial                    | 1         | 1     | 1        |
| P00491 | PNPH  | HUMAN - PNP Purine nucleoside phosphorylase                     | 2.3333333 | 2.25  | 0.964286 |
| P46781 | RS9   | HUMAN - RPS9 40S ribosomal protein S9                           | 8.6666667 | 8.25  | 0.951923 |
| P84098 | RL19  | HUMAN - RPL19 60S ribosomal protein L19                         | 11        | 10.25 | 0.931818 |
| Q9Y237 | PIN4  | HUMAN - PIN4 Peptidyl-prolyl cis-trans isomerase NIMA-interacti | 1.6666667 | 1.5   | 0.9      |
| P11586 | C1TC  | HUMAN - MTHFD1 C-1-tetrahydrofolate synthase, cytoplasmic       | 1.6666667 | 1.5   | 0.9      |
| Q9GZV4 | IF5A2 | HUMAN - EIF5A2 Eukaryotic translation initiation factor 5A-2    | 5.6666667 | 5     | 0.882353 |
| P62249 | RS16  | HUMAN - RPS16 40S ribosomal protein S16                         | 4.3333333 | 3.75  | 0.865385 |
| P23396 | RS3   | HUMAN - RPS3 40S ribosomal protein S3                           | 5.3333333 | 4.5   | 0.84375  |
| P62750 | RL23A | HUMAN - RPL23A 60S ribosomal protein L23a                       | 3         | 2.5   | 0.833333 |
| P62826 | RAN   | HUMAN - RAN GTP-binding nuclear protein Ran                     | 16.333333 | 13    | 0.795918 |
| P60174 | TPIS  | HUMAN - TPI1 Triosephosphate isomerase                          | 7         | 5.5   | 0.785714 |
| P22392 | NDKB  | HUMAN - NME2 Nucleoside diphosphate kinase B                    | 25.666667 | 19.25 | 0.75     |
| P35244 | RFA3  | HUMAN - RPA3 Replication protein A 14 kDa subunit               | 2         | 1.5   | 0.75     |
| P0CW22 | RS17L | HUMAN - RPS17L 40S ribosomal protein S17-like                   | 3.3333333 | 2.5   | 0.75     |
| P62906 | RL10A | HUMAN - RPL10A 60S ribosomal protein L10a                       | 3.3333333 | 2.5   | 0.75     |
| P62917 | RL8   | HUMAN - RPL8 60S ribosomal protein L8                           | 1.3333333 | 1     | 0.75     |
| P49720 | PSB3  | HUMAN - PSMB3 Proteasome subunit beta type-3                    | 1         | 0.75  | 0.75     |
| Q9BWD1 | THIC  | HUMAN - ACAT2 Acetyl-CoA acetyltransferase, cytosolic           | 1.6666667 | 1.25  | 0.75     |

|        |       |                                                             |           |      |          |
|--------|-------|-------------------------------------------------------------|-----------|------|----------|
| P31939 | PUR9  | HUMAN - ATIC Bifunctional purine biosynthesis protein PURH  | 2.3333333 | 1.75 | 0.75     |
| Q12873 | CHD3  | HUMAN - CHD3 Chromodomain-helicase-DNA-binding protein 3    | 0.6666667 | 0.5  | 0.75     |
| P40926 | MDHM  | HUMAN - MDH2 Malate dehydrogenase, mitochondrial            | 1.6666667 | 1.25 | 0.75     |
| Q99598 | TSNAX | HUMAN - TSNAX Translin-associated protein X                 | 0.6666667 | 0.5  | 0.75     |
| P24752 | THIL  | HUMAN - ACAT1 Acetyl-CoA acetyltransferase, mitochondrial   | 0.6666667 | 0.5  | 0.75     |
| Q5VT06 | CE350 | HUMAN - CEP350 Centrosome-associated protein 350            | 0.6666667 | 0.5  | 0.75     |
| P07737 | PROF1 | HUMAN - PFN1 Profilin-1                                     | 0.6666667 | 0.5  | 0.75     |
| P68133 | ACTS  | HUMAN - ACTA1 Actin, alpha skeletal muscle                  | 1.3333333 | 1    | 0.75     |
| P62736 | ACTA  | HUMAN - ACTA2 Actin, aortic smooth muscle                   | 1.3333333 | 1    | 0.75     |
| Q96RQ3 | MCCA  | HUMAN - MCCC1 Methylcrotonoyl-CoA carboxylase subunit alpl  | 34        | 24.5 | 0.720588 |
| P63244 | GBLP  | HUMAN - GNB2L1 Guanine nucleotide-binding protein subunit b | 9.6666667 | 6.75 | 0.698276 |
| P62277 | RS13  | HUMAN - RPS13 40S ribosomal protein S13                     | 13.666667 | 9.5  | 0.695122 |
| P46778 | RL21  | HUMAN - RPL21 60S ribosomal protein L21                     | 15.333333 | 10.5 | 0.684783 |
| P46777 | RL5   | HUMAN - RPL5 60S ribosomal protein L5                       | 3.6666667 | 2.25 | 0.613636 |
| Q02878 | RL6   | HUMAN - RPL6 60S ribosomal protein L6                       | 10.333333 | 6.25 | 0.604839 |
| Q7L7L0 | H2A3  | HUMAN - HIST3H2A Histone H2A type 3                         | 4.6666667 | 2.75 | 0.589286 |
| P62244 | RS15A | HUMAN - RPS15A 40S ribosomal protein S15a                   | 26.333333 | 15.5 | 0.588608 |
| P50454 | SERPH | HUMAN - SERPINH1 Serpin H1                                  | 1.3333333 | 0.75 | 0.5625   |
| P62424 | RL7A  | HUMAN - RPL7A 60S ribosomal protein L7a                     | 13        | 7    | 0.538462 |
| P42766 | RL35  | HUMAN - RPL35 60S ribosomal protein L35                     | 2.3333333 | 1.25 | 0.535714 |
| P35908 | K22E  | HUMAN - KRT2 Keratin, type II cytoskeletal 2 epidermal      | 22.666667 | 12   | 0.529412 |
| P05165 | PCCA  | HUMAN - PCCA Propionyl-CoA carboxylase alpha chain, mitoch  | 27.333333 | 14   | 0.512195 |
| P39023 | RL3   | HUMAN - RPL3 60S ribosomal protein L3                       | 13.333333 | 6.75 | 0.50625  |
| Q9NR31 | SAR1A | HUMAN - SAR1A GTP-binding protein SAR1a                     | 1         | 0.5  | 0.5      |
| P26373 | RL13  | HUMAN - RPL13 60S ribosomal protein L13                     | 1         | 0.5  | 0.5      |
| Q9BVA1 | TBB2B | HUMAN - TUBB2B Tubulin beta-2B chain                        | 21.333333 | 10.5 | 0.492188 |
| P13647 | K2C5  | HUMAN - KRT5 Keratin, type II cytoskeletal 5                | 2.6666667 | 1.25 | 0.46875  |
| P61313 | RL15  | HUMAN - RPL15 60S ribosomal protein L15                     | 45        | 20   | 0.444444 |
| P84077 | ARF1  | HUMAN - ARF1 ADP-ribosylation factor 1                      | 2.3333333 | 1    | 0.428571 |
| P61204 | ARF3  | HUMAN - ARF3 ADP-ribosylation factor 3                      | 2.3333333 | 1    | 0.428571 |
| P61353 | RL27  | HUMAN - RPL27 60S ribosomal protein L27                     | 5.3333333 | 2.25 | 0.421875 |



|        |          |                                                                  |            |       |          |
|--------|----------|------------------------------------------------------------------|------------|-------|----------|
| P99999 | CYC      | HUMAN - CYCS Cytochrome c                                        | 3          | 1.25  | 0.416667 |
| Q96L21 | RL10L    | HUMAN - RPL10L 60S ribosomal protein L10-like                    | 3.6666667  | 1.5   | 0.409091 |
| P62847 | RS24     | HUMAN - RPS24 40S ribosomal protein S24                          | 17.3333333 | 7     | 0.403846 |
| P04264 | K2C1     | HUMAN - KRT1 Keratin, type II cytoskeletal 1                     | 83.6666667 | 32.75 | 0.391434 |
| P20618 | PSB1     | HUMAN - PSMB1 Proteasome subunit beta type-1                     | 2          | 0.75  | 0.375    |
| P35527 | K1C9     | HUMAN - KRT9 Keratin, type I cytoskeletal 9                      | 51.3333333 | 18    | 0.350649 |
| Q86YZ3 | HORN     | HUMAN - HRNR Hornerin                                            | 1.6666667  | 0.5   | 0.3      |
| P62241 | RS8      | HUMAN - RPS8 40S ribosomal protein S8                            | 4.6666667  | 1.25  | 0.267857 |
| Q04837 | SSBP     | HUMAN - SSBP1 Single-stranded DNA-binding protein, mitocho       | 4.6666667  | 1.25  | 0.267857 |
| Q9Y3U8 | RL36     | HUMAN - RPL36 60S ribosomal protein L36                          | 7          | 1.75  | 0.25     |
| Q13283 | G3BP1    | HUMAN - G3BP1 Ras GTPase-activating protein-binding protein      | 2.3333333  | 0.5   | 0.214286 |
| Q13085 | ACACA    | HUMAN - ACACA Acetyl-CoA carboxylase 1                           | 334        | 55    | 0.164671 |
| P53999 | TCP4     | HUMAN - SUB1 Activated RNA polymerase II transcriptional coa     | 0.6666667  | 0     | 0        |
| P63172 | DYLT1    | HUMAN - DYNLT1 Dynein light chain Tctex-type 1                   | 0.6666667  | 0     | 0        |
| P18085 | ARF4     | HUMAN - ARF4 ADP-ribosylation factor 4                           | 0.6666667  | 0     | 0        |
| Q8TAT6 | NPL4     | HUMAN - NPLOC4 Nuclear protein localization protein 4 homolo     | 0.6666667  | 0     | 0        |
| O43684 | BUB - BI | HUMAN - Mitotic checkpoint protein BUB3                          | 1.6666667  | 0     | 0        |
| O00763 | ACACB    | HUMAN - ACACB Acetyl-CoA carboxylase 2                           | 36.6666667 | 0     | 0        |
| P14174 | MIF      | HUMAN - MIF Macrophage migration inhibitory factor               | 0.6666667  | 0     | 0        |
| P62304 | RUXE     | HUMAN - SNRPE Small nuclear ribonucleoprotein E                  | 1          | 0     | 0        |
| O14602 | IF1AY    | HUMAN - EIF1AY Eukaryotic translation initiation factor 1A, Y-ch | 1          | 0     | 0        |
| P25325 | THTM     | HUMAN - MPST 3-mercaptopyruvate sulfurtransferase                | 0.6666667  | 0     | 0        |
| P28070 | PSB4     | HUMAN - PSMB4 Proteasome subunit beta type-4                     | 1          | 0     | 0        |
| P13804 | ETFA     | HUMAN - ETFA Electron transfer flavoprotein subunit alpha, mit   | 1          | 0     | 0        |
| Q9Y281 | COF2     | HUMAN - CFL2 Cofilin-2                                           | 4.6666667  | 0     | 0        |
| Q5XKE5 | K2C79    | HUMAN - KRT79 Keratin, type II cytoskeletal 79                   | 1.3333333  | 0     | 0        |
| P50213 | IDH3A    | HUMAN - IDH3A Isocitrate dehydrogenase                           | 0.6666667  | 0     | 0        |
| P22090 | RS4Y1    | HUMAN - RPS4Y1 40S ribosomal protein S4, Y isoform 1             | 1.3333333  | 0     | 0        |
| Q9BQI9 | NRIP2    | HUMAN - NRIP2 Nuclear receptor-interacting protein 2             | 1          | 0     | 0        |
| P00505 | AATM     | HUMAN - GOT2 Aspartate aminotransferase, mitochondrial           | 0.6666667  | 0     | 0        |
| Q9BTA9 | WAC - W  | HUMAN - WW domain-containing adapter protein with coiled-cc      | 1          | 0     | 0        |

|        |          |                                                             |           |   |   |
|--------|----------|-------------------------------------------------------------|-----------|---|---|
| P11908 | PRPS2    | HUMAN - PRPS2 Ribose-phosphate pyrophosphokinase 2          | 1         | 0 | 0 |
| P21108 | PRPS3    | HUMAN - PRPS1L1 Ribose-phosphate pyrophosphokinase 3        | 1         | 0 | 0 |
| Q9BPW8 | NIPS1    | HUMAN - NIPSNAP1 Protein NipSnap homolog 1                  | 1         | 0 | 0 |
| Q15428 | SF3A2    | HUMAN - SF3A2 Splicing factor 3A subunit 2                  | 0.6666667 | 0 | 0 |
| Q96EE3 | SEH1     | HUMAN - SEH1L Nucleoporin SEH1                              | 1         | 0 | 0 |
| Q92820 | GGH      | HUMAN - GGH Gamma-glutamyl hydrolase                        | 2         | 0 | 0 |
| P31937 | 3HIDH    | HUMAN - HIBADH 3-hydroxyisobutyrate dehydrogenase, mitoch   | 0.6666667 | 0 | 0 |
| P53675 | CLH2     | HUMAN - CLTCL1 Clathrin heavy chain 2                       | 1         | 0 | 0 |
| Q6PJT7 | ZC3HE    | HUMAN - ZC3H14 Zinc finger CCCH domain-containing protein   | 0.6666667 | 0 | 0 |
| P15924 | DESP     | HUMAN - DSP Desmoplakin                                     | 0.6666667 | 0 | 0 |
| Q03001 | DYST     | HUMAN - DST Dystonin                                        | 0.6666667 | 0 | 0 |
| Q09666 | AHN - AI | HUMAN - Neuroblast differentiation-associated protein AHNAK | 0.6666667 | 0 | 0 |
| O60361 | NDK8     | HUMAN - NME2P1 Putative nucleoside diphosphate kinase       | 4.3333333 | 0 | 0 |
| P30050 | RL12     | HUMAN - RPL12 60S ribosomal protein L12                     | 1         | 0 | 0 |
| Q6S8J3 | POTEE    | HUMAN - POTEE POTE ankyrin domain family member E           | 1.3333333 |   |   |
